# Supplementary material for: Gene Frequency Distributions Reject a Neutral Model of Genome Evolution
Source: PubMed Central journal article supplement — Genome Biol Evol. 2013 Jan 11;5(1):233–42. doi: 10.1093/gbe/evt002 (PMC3595032; doi:10.1093/gbe/evt002), 2013-01-11
Supplement: supp_evt002_lobkovsky_steady_fixed_sizesupp_v2.pdf [file supp_evt002_lobkovsky_steady_fixed_sizesupp_v2.pdf]

## 1 Starness

The chosen groups vary in starness and surprisingly exhibit a non-uniform dependence on the mean branch length. Figure S1 illustrates the finding that the starness generally increases with evolutionary distance. This may be due to the tendency for the existence of a large number of closely related sequenced organisms which make for low starness trees.

## 2 Computing the expected gene frequencies

Figure S2 illustrates the computational steps involved in computing the contribution of a particular pattern of keep/replace events on the branches of a tree to the total gene frequency histogram including the computation of the probability of occurrence of the pattern.

## 3 Stochastic population model with additive per-gene fitness effects

Figure S3 illustrates the evolutionary model based on a Moran process with selection in which the replicating individuals are chosen with the probability proportional to the sum of the fitness contributions of their constituent genes. The individual that is replaced is chosen at random.

## 4 Distribution of gene replacement rates in the stochastic population model

Figure S4 shows the effect of increasing selection strength reflected by the ratio of the population size to the genome size on the distribution of gene replacement rates. When the genome size is large compared to the population size, genes are fixed in an essentially neutral manner through drift which results in a sharply peaked distribution of replacement rates. Under high selection each decade in replacement rate contributes a roughly equal weight into the distribution. For example, there are roughly the same number of genes with replacement rates between  $10^{-4}$  and  $10^{-3}$  as there are genes with replacement rates between  $10^{-3}$  and  $10^{-2}$ .

## 5 Stochastic population model with fluctuating genome size

To test the fixed genome size assumption made in the rest of the manuscript, we explore a population model with a fluctuating genome size. As before the organism's fitness is the sum of the fitness contributions of its constituent genes.

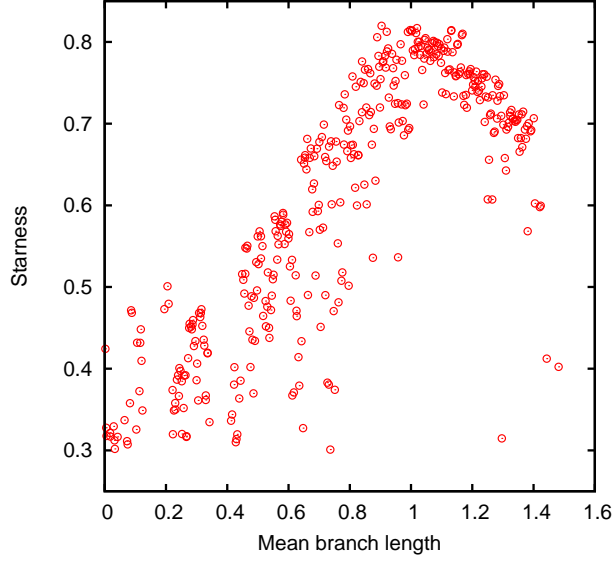

Figure S1: Starness of the chosen groups as a function of the mean branch length.

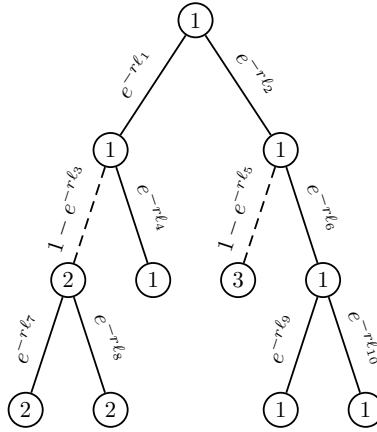

Figure S2: The schematic of the computation of the contribution to the gene frequency histogram of a particular pattern of replacements of a gene with replacement rate  $r$ . The gene was kept on branches drawn as solid lines and replaced on dashed branches. The probability of occurrence of this pattern  $P = e^{-rL}(1 - e^{-r\ell_3})(1 - e^{-r\ell_5})$  is the product of factors indicated on the branches. Here  $L = \ell_1 + \ell_2 + \ell_4 + \ell_6 + \ell_7 + \ell_8 + \ell_9 + \ell_{10}$  is the sum of the lengths of branches on which replacement did not occur. The contribution of this pattern to the total commonality plot is the product of  $P$  and gene frequencies  $c_k$  ( $c_1 = 1/6$ ,  $c_2 = 1/3$ ,  $c_3 = 1/2$ ,  $c_4 = c_5 = c_6 = 0$ ) that result from it.

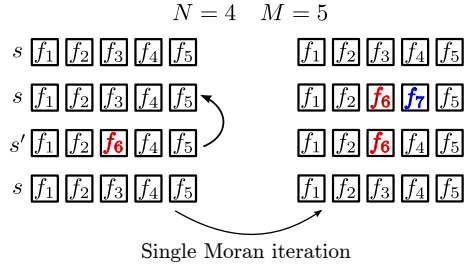

Figure S3: The iteration of the Moran process with selection consists of selecting an individual with the probability proportional to its fitness. In this figure, the mutant with the fitness  $s' = f_1 + f_2 + f_4 + f_5 + f_6$  is chosen with probability  $s'/(s' + 3s)$  where  $s = f_1 + f_2 + f_3 + f_4 + f_5$ . The chosen individual undergoes the mutation process and replaces an organism chosen at random. The mutation process in the figure replaced gene  $f_4$  with a new gene  $f_7$  drawn from an exponential distribution with unit mean.

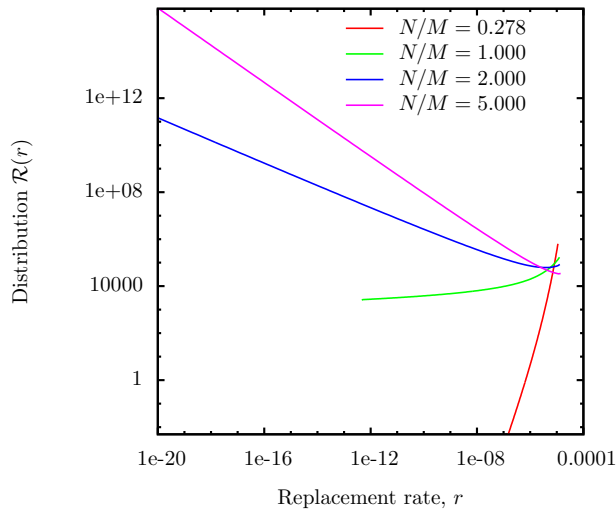

Figure S4: Steady state distribution of gene replacement rates derived from the stochastic population model.

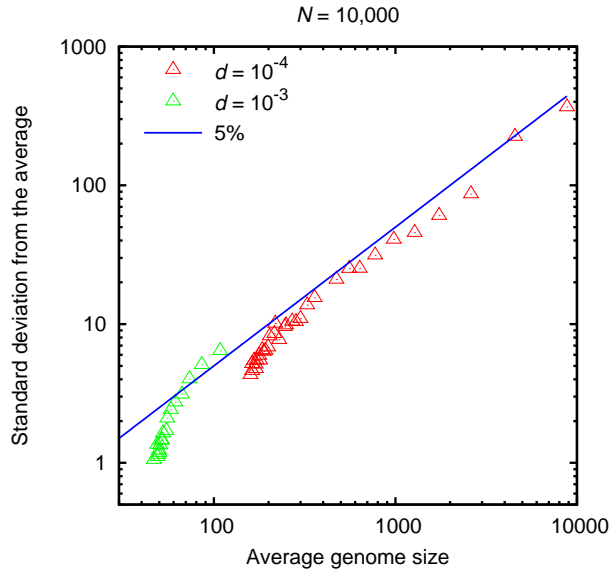

Figure S5: Standard deviation of the genome size from the average in steady state for a fixed population size and two values of the deletion probability.

Each gene is identified only by its fitness contribution. The fixed population size Wright-Fisher dynamics with selection are implemented. In each generation each surviving genome is subjected to two mutation steps: 1) random genes are deleted with a small per-gene probability  $d$ ; 2) new genes are added to the genome with a smaller per-gene innovation probability. Each new gene's fitness contribution is drawn from an exponential distribution with unit mean.

The steady state genome size is set by the duplication, deletion, selection balance. We vary the steady state genome size by almost two orders of magnitude by varying the deletion and innovation probabilities while fixing the population size. Figure S5 displays the standard deviation of the genome size fluctuations about the mean. These fluctuations are at most a few percent of the steady state genome size for the full range of sizes studied (the solid line is the 5% of the genome size).

## 6 Non-overlapping groups of closely related organisms

To address the issues that stem from the overlapping content of the chosen groups we select 17 groups with distinct species content and the average tip-to-root distance less than 0.5. The fits to the non-overlapping groups exhibit the same patterns that were found in the complete dataset.

Table 1: Model fits to 16 non-overlapping groups of closely related prokaryotes

| Group | Mean branch length | Model A |       |       | Model B   |           |               | Model C |       |                 | Model D |      |       |        |
|-------|--------------------|---------|-------|-------|-----------|-----------|---------------|---------|-------|-----------------|---------|------|-------|--------|
|       |                    | Rate    | AIC   | AIC   | Fast rate | Slow rate | Slow fraction | AIC     | Rate  | Shape parameter | AIC     | Rate | N/M   | AIC    |
| 1     | 0.002              | 75.86   | -0.76 | -0.76 | 429.34    | 14.76     | 0.80          | -14.9   | 706.5 | 0.102           | -12.51  | 1.10 | 11.79 | -16.37 |
| 2     | 0.005              | 38.69   | -6.24 | -6.24 | 307.94    | 13.98     | 0.85          | -15.4   | 858.7 | 0.004           | -23.21  | 1.00 | 14.12 | -17.35 |
| 10    | 0.065              | 2.75    | -1.82 | -1.82 | 27.93     | 0.61      | 0.78          | -13.6   | 417.7 | 0.000           | -18.79  | 0.84 | 14.77 | -19.05 |
| 14    | 0.086              | 1.82    | -3.13 | -3.13 | 9.14      | 0.28      | 0.71          | -22.2   | 30.4  | 0.111           | -22.16  | 0.38 | 9.62  | -26.88 |
| 16    | 0.103              | 2.72    | -7.17 | -7.17 | 10.05     | 0.64      | 0.65          | -14.0   | 15.5  | 0.294           | -19.64  | 0.91 | 6.03  | -18.28 |
| 17    | 0.106              | 2.25    | -3.24 | -3.24 | 7.58      | 0.22      | 0.59          | -12.0   | 27.1  | 0.217           | -12.49  | 1.35 | 6.49  | -14.28 |
| 23    | 0.195              | 1.09    | -0.32 | -0.32 | 4.42      | 0.10      | 0.62          | -27.4   | 19.4  | 0.167           | -17.47  | 0.43 | 7.88  | -25.66 |
| 31    | 0.236              | 1.05    | -4.05 | -4.05 | 4.28      | 0.20      | 0.63          | -15.2   | 11.3  | 0.232           | -21.36  | 0.77 | 6.79  | -19.96 |
| 35    | 0.248              | 1.10    | -4.41 | -4.41 | 6.74      | 0.37      | 0.66          | -29.4   | 16.2  | 0.235           | -31.45  | 0.36 | 6.49  | -27.50 |
| 37    | 0.252              | 1.45    | -3.23 | -3.23 | 7.88      | 0.36      | 0.66          | -12.5   | 17.8  | 0.211           | -15.10  | 1.42 | 6.94  | -13.81 |
| 62    | 0.330              | 1.00    | -2.88 | -2.88 | 4.36      | 0.22      | 0.59          | -13.0   | 14.4  | 0.245           | -18.36  | 1.05 | 6.11  | -16.82 |
| 70    | 0.424              | 0.72    | -4.80 | -4.80 | 2.22      | 0.09      | 0.55          | -13.7   | 7.4   | 0.285           | -21.33  | 0.71 | 6.02  | -20.76 |
| 77    | 0.452              | 0.59    | -1.58 | -1.58 | 1.96      | 0.06      | 0.50          | -24.4   | 6.6   | 0.365           | -22.76  | 0.17 | 5.23  | -34.88 |
| 88    | 0.485              | 0.87    | -0.54 | -0.54 | 2.98      | 0.09      | 0.53          | -27.2   | 10.7  | 0.315           | -20.48  | 0.27 | 5.68  | -30.24 |
| 91    | 0.495              | 0.61    | -0.13 | -0.13 | 2.01      | 0.08      | 0.52          | -25.8   | 5.4   | 0.381           | -18.39  | 0.38 | 5.14  | -27.10 |
| 93    | 0.499              | 0.47    | -2.20 | -2.20 | 1.69      | 0.06      | 0.53          | -18.5   | 6.4   | 0.323           | -26.22  | 0.13 | 5.46  | -37.45 |

## 7 List of species in chosen group

# 1

331111 *Escherichia coli* E24377A  
344610 *Escherichia coli* 53638  
364106 *Escherichia coli* UTI89  
409438 *Escherichia coli* SE11  
444451 *Escherichia coli* O157:H7 str. EC4196  
444452 *Escherichia coli* O157:H7 str. EC4113  
585056 *Escherichia coli* UMN026  
585395 *Escherichia coli* O103:H2 str. 12009  
585397 *Escherichia coli* ED1a  
701177 *Escherichia coli* O55:H7 str. CB9615

# 2

37762 *Escherichia coli* B  
198214 *Shigella flexneri* 2a str. 301  
300268 *Shigella boydii* Sb227  
316407 *Escherichia coli* str. K-12 substr. W3110  
331112 *Escherichia coli* HS  
358709 *Escherichia coli* 101-1  
502347 *Escherichia albertii* TW07627  
585034 *Escherichia coli* IAI1  
585054 *Escherichia fergusonii* ATCC 35469  
866768 *Escherichia coli* 'BL21-Gold(DE3)pLysS AG'

# 3

41514 *Salmonella enterica* subsp. *arizonae* serovar 62:z4,z23:-  
321314 *Salmonella enterica* subsp. *enterica* serovar Choleraesuis str. SC-B67  
439847 *Salmonella enterica* subsp. *enterica* serovar Saintpaul str. SARA29  
439851 *Salmonella enterica* subsp. *enterica* serovar Dublin str. CT\_02021853  
440534 *Salmonella enterica* subsp. *enterica* serovar 4,[5],12:i:- str. CVM23701  
454165 *Salmonella enterica* subsp. *enterica* serovar Schwarzengrund str. SL480  
454166 *Salmonella enterica* subsp. *enterica* serovar Agona str. SL483  
465516 *Salmonella enterica* subsp. *enterica* serovar Hadar str. RI\_05P066  
476213 *Salmonella enterica* subsp. *enterica* serovar Paratyphi C strain RKS4594  
497974 *Salmonella enterica* subsp. *enterica* serovar Typhi str. E02-1180

# 4

290338 *Citrobacter koseri* ATCC BAA-895  
331111 *Escherichia coli* E24377A  
344610 *Escherichia coli* 53638  
409438 *Escherichia coli* SE11

439855 *Escherichia coli* SMS-3-5  
444451 *Escherichia coli* O157:H7 str. EC4196  
454167 *Salmonella enterica* subsp. *enterica* serovar Javiana str. GA\_MM04042433  
585056 *Escherichia coli* UMN026  
585397 *Escherichia coli* ED1a  
637910 *Citrobacter rodentium* ICC168

# 5

290338 *Citrobacter koseri* ATCC BAA-895  
331111 *Escherichia coli* E24377A  
405955 *Escherichia coli* APEC 01  
409438 *Escherichia coli* SE11  
423368 *Salmonella enterica* subsp. *enterica* serovar Newport str. SL254  
439855 *Escherichia coli* SMS-3-5  
454167 *Salmonella enterica* subsp. *enterica* serovar Javiana str. GA\_MM04042433  
585055 *Escherichia coli* 55989  
585056 *Escherichia coli* UMN026  
637910 *Citrobacter rodentium* ICC168

# 6

290338 *Citrobacter koseri* ATCC BAA-895  
331111 *Escherichia coli* E24377A  
344610 *Escherichia coli* 53638  
409438 *Escherichia coli* SE11  
444451 *Escherichia coli* O157:H7 str. EC4196  
454167 *Salmonella enterica* subsp. *enterica* serovar Javiana str. GA\_MM04042433  
585056 *Escherichia coli* UMN026  
585397 *Escherichia coli* ED1a  
637910 *Citrobacter rodentium* ICC168  
640131 *Klebsiella variicola* At-22

# 7

37762 *Escherichia coli* B  
41514 *Salmonella enterica* subsp. *arizonae* serovar 62:z4,z23:-  
198214 *Shigella flexneri* 2a str. 301  
300267 *Shigella dysenteriae* Sd197  
340197 *Escherichia coli* F11  
344609 *Shigella boydii* CDC 3083-94  
454165 *Salmonella enterica* subsp. *enterica* serovar Schwarzengrund str. SL480  
454231 *Salmonella enterica* subsp. *enterica* serovar Kentucky str. CDC 191  
500639 *Enterobacter cancerogenus* ATCC 35316  
502347 *Escherichia albertii* TW07627

# 8

41514 *Salmonella enterica* subsp. *arizonae* serovar 62:z4,z23:-  
198214 *Shigella flexneri* 2a str. 301  
300267 *Shigella dysenteriae* Sd197  
321314 *Salmonella enterica* subsp. *enterica* serovar Choleraesuis str. SC-B67  
340184 *Escherichia coli* B7A  
340197 *Escherichia coli* F11  
344609 *Shigella boydii* CDC 3083-94  
454164 *Salmonella enterica* subsp. *enterica* serovar Heidelberg str. SL486  
497974 *Salmonella enterica* subsp. *enterica* serovar Typhi str. E02-1180  
500639 *Enterobacter cancerogenus* ATCC 35316

# 9

37762 *Escherichia coli* B  
41514 *Salmonella enterica* subsp. *arizonae* serovar 62:z4,z23:-  
198214 *Shigella flexneri* 2a str. 301  
290339 *Cronobacter sakazakii* ATCC BAA-894  
300267 *Shigella dysenteriae* Sd197  
340197 *Escherichia coli* F11  
344609 *Shigella boydii* CDC 3083-94  
454231 *Salmonella enterica* subsp. *enterica* serovar Kentucky str. CDC 191  
500639 *Enterobacter cancerogenus* ATCC 35316  
502347 *Escherichia albertii* TW07627

# 10

216591 *Burkholderia cenocepacia* J2315  
320373 *Burkholderia pseudomallei* 668  
331272 *Burkholderia cenocepacia* HI2424  
396596 *Burkholderia ambifaria* IOP40-10  
396597 *Burkholderia ambifaria* MEX-5  
398527 *Burkholderia phytofirmans* PsJN  
406425 *Burkholderia cenocepacia* MC0-3  
441163 *Burkholderia oklahomensis* E0147  
441166 *Burkholderia ubonensis* Bu  
640511 *Burkholderia* sp. CCGE1002

# 11

37762 *Escherichia coli* B  
290339 *Cronobacter sakazakii* ATCC BAA-894  
300268 *Shigella boydii* Sb227  
399742 *Enterobacter* sp. 638  
496064 *Salmonella enterica* subsp. *enterica* serovar Typhi str. E98-3139



502347 *Escherichia albertii* TW07627  
550537 *Salmonella enterica* subsp. *enterica* serovar *Enteritidis* str. P125109  
585054 *Escherichia fergusonii* ATCC 35469  
693216 *Cronobacter turicensis* z3032  
706191 *Pantoea ananatis* LMG 20103

# 12

37762 *Escherichia coli* B  
300268 *Shigella boydii* Sb227  
399742 *Enterobacter* sp. 638  
454231 *Salmonella enterica* subsp. *enterica* serovar *Kentucky* str. CDC 191  
496064 *Salmonella enterica* subsp. *enterica* serovar *Typhi* str. E98-3139  
502347 *Escherichia albertii* TW07627  
550537 *Salmonella enterica* subsp. *enterica* serovar *Enteritidis* str. P125109  
585054 *Escherichia fergusonii* ATCC 35469  
693216 *Cronobacter turicensis* z3032  
706191 *Pantoea ananatis* LMG 20103

# 13

214092 *Yersinia pestis* C092  
349966 *Yersinia frederiksenii* ATCC 33641  
360099 *Yersinia pestis* biovar *Antiqua* str. E1979001  
393305 *Yersinia enterocolitica* subsp. *enterocolitica* 8081  
404218 *Yersinia pestis* biovar *Antiqua* str. UG05-0454  
481805 *Escherichia coli* ATCC 8739  
502800 *Yersinia pseudotuberculosis* YPIII  
561229 *Dickeya zeae* Ech1591  
590409 *Dickeya dadantii* Ech586  
693216 *Cronobacter turicensis* z3032

# 14

214092 *Yersinia pestis* C092  
349966 *Yersinia frederiksenii* ATCC 33641  
393305 *Yersinia enterocolitica* subsp. *enterocolitica* 8081  
481805 *Escherichia coli* ATCC 8739  
550537 *Salmonella enterica* subsp. *enterica* serovar *Enteritidis* str. P125109  
558270 *Pectobacterium carotovorum* subsp. *carotovorum* WPP14  
561229 *Dickeya zeae* Ech1591  
590409 *Dickeya dadantii* Ech586  
693216 *Cronobacter turicensis* z3032  
706191 *Pantoea ananatis* LMG 20103

# 15

349966 *Yersinia frederiksenii* ATCC 33641  
358709 *Escherichia coli* 101-1  
399742 *Enterobacter* sp. 638  
404216 *Yersinia pestis* biovar *Mediaevalis* str. K1973002  
550537 *Salmonella enterica* subsp. *enterica* serovar *Enteritidis* str. P125109  
558270 *Pectobacterium carotovorum* subsp. *carotovorum* WPP14  
561229 *Dickeya zeae* Ech1591  
590409 *Dickeya dadantii* Ech586  
693216 *Cronobacter turicensis* z3032  
706191 *Pantoea ananatis* LMG 20103

# 16

208435 *Streptococcus agalactiae* 2603V/R  
342617 *Streptococcus agalactiae* CJB111  
391295 *Streptococcus suis* 05ZYH33  
391296 *Streptococcus suis* 98HAH33  
487214 *Streptococcus pneumoniae* Hungary19A-6  
488221 *Streptococcus pneumoniae* 70585  
488222 *Streptococcus pneumoniae* JJA  
512566 *Streptococcus pneumoniae* G54  
516950 *Streptococcus pneumoniae* CGSP14  
637909 *Streptococcus gallolyticus* UCN34

# 17

205921 *Streptococcus agalactiae* A909  
210007 *Streptococcus mutans* UA159  
299768 *Streptococcus thermophilus* CNRZ1066  
365659 *Streptococcus mitis* B6  
370554 *Streptococcus pyogenes* MGAS10750  
373153 *Streptococcus pneumoniae* D39  
453363 *Streptococcus pneumoniae* SP195  
453366 *Streptococcus pneumoniae* MLV-016  
561276 *Streptococcus pneumoniae* ATCC 700669  
568814 *Streptococcus suis* BM407

# 18

37762 *Escherichia coli* B  
218491 *Pectobacterium atrosepticum* SCRI1043  
290339 *Cronobacter sakazakii* ATCC BAA-894  
291112 *Photobacterium asymbiotica*  
300269 *Shigella sonnei* Ss046  
360102 *Yersinia pestis* Antiqua

406818 *Xenorhabdus bovienii* SS-2004  
502347 *Escherichia albertii* TW07627  
561231 *Pectobacterium wasabiae* WPP163  
585034 *Escherichia coli* IAI1

# 19

290339 *Cronobacter sakazakii* ATCC BAA-894  
291112 *Photobacterium asymbiotica*  
360102 *Yersinia pestis* Antiqua  
399742 *Enterobacter* sp. 638  
406818 *Xenorhabdus bovienii* SS-2004  
454231 *Salmonella enterica* subsp. *enterica* serovar Kentucky str. CDC 191  
558270 *Pectobacterium carotovorum* subsp. *carotovorum* WPP14  
561231 *Pectobacterium wasabiae* WPP163  
706191 *Pantoea ananatis* LMG 20103  
866768 *Escherichia coli* 'BL21-Gold(DE3)pLysS AG'

# 20

214092 *Yersinia pestis* C092  
349966 *Yersinia frederiksenii* ATCC 33641  
406818 *Xenorhabdus bovienii* SS-2004  
481805 *Escherichia coli* ATCC 8739  
550537 *Salmonella enterica* subsp. *enterica* serovar Enteritidis str. P125109  
558270 *Pectobacterium carotovorum* subsp. *carotovorum* WPP14  
561229 *Dickeya zeae* Ech1591  
590409 *Dickeya dadantii* Ech586  
693216 *Cronobacter turicensis* z3032  
706191 *Pantoea ananatis* LMG 20103

# 21

349966 *Yersinia frederiksenii* ATCC 33641  
358709 *Escherichia coli* 101-1  
360102 *Yersinia pestis* Antiqua  
399742 *Enterobacter* sp. 638  
406818 *Xenorhabdus bovienii* SS-2004  
550537 *Salmonella enterica* subsp. *enterica* serovar Enteritidis str. P125109  
558270 *Pectobacterium carotovorum* subsp. *carotovorum* WPP14  
585054 *Escherichia fergusonii* ATCC 35469  
693216 *Cronobacter turicensis* z3032  
706191 *Pantoea ananatis* LMG 20103

# 22

41514 *Salmonella enterica* subsp. *arizonae* serovar 62:z4,z23:-  
198628 *Dickeya dadantii* 3937  
243265 *Photobacterium luminescens* subsp. *laumondii* TT01  
300267 *Shigella dysenteriae* Sd197  
321314 *Salmonella enterica* subsp. *enterica* serovar *Choleraesuis* str. SC-B67  
340184 *Escherichia coli* B7A  
344609 *Shigella boydii* CDC 3083-94  
454165 *Salmonella enterica* subsp. *enterica* serovar *Schwarzengrund* str. SL480  
500639 *Enterobacter cancerogenus* ATCC 35316  
521000 *Providencia rettgeri* DSM 1131

# 23

246200 *Ruegeria pomeroyi* DSS-3  
252305 *Oceanicola batsensis* HTCC2597  
272943 *Rhodobacter sphaeroides* 2.4.1  
290400 *Jannaschia* sp. CCS1  
349101 *Rhodobacter sphaeroides* ATCC 17029  
349102 *Rhodobacter sphaeroides* ATCC 17025  
351016 *Roseobacter* sp. AzwK-3b  
375451 *Roseobacter denitrificans* OCh 114  
391624 *Oceanibulbus indolifex* HEL-45  
398580 *Dinoroseobacter shibae* DFL 12

# 24

246200 *Ruegeria pomeroyi* DSS-3  
252305 *Oceanicola batsensis* HTCC2597  
272943 *Rhodobacter sphaeroides* 2.4.1  
290400 *Jannaschia* sp. CCS1  
349101 *Rhodobacter sphaeroides* ATCC 17029  
351016 *Roseobacter* sp. AzwK-3b  
375451 *Roseobacter denitrificans* OCh 114  
391613 *Roseovarius* sp. TM1035  
391624 *Oceanibulbus indolifex* HEL-45  
398580 *Dinoroseobacter shibae* DFL 12

# 25

246200 *Ruegeria pomeroyi* DSS-3  
252305 *Oceanicola batsensis* HTCC2597  
272943 *Rhodobacter sphaeroides* 2.4.1  
349101 *Rhodobacter sphaeroides* ATCC 17029  
351016 *Roseobacter* sp. AzwK-3b  
375451 *Roseobacter denitrificans* OCh 114  
391613 *Roseovarius* sp. TM1035

391619 *Phaeobacter gallaeciensis* DSM 17395  
391624 *Oceanibulbus indolifex* HEL-45  
398580 *Dinoroseobacter shibae* DFL 12

# 26

121723 *Photobacterium* sp. SKA34  
150340 *Vibrio* sp. Ex25  
198628 *Dickeya dadantii* 3937  
216895 *Vibrio vulnificus* CMCP6  
218491 *Pectobacterium atrosepticum* SCRI1043  
290339 *Cronobacter sakazakii* ATCC BAA-894  
291112 *Photorhabdus asymbiotica*  
314290 *Vibrio* sp. MED222  
404217 *Yersinia pestis* biovar *Orientalis* str. MG05-1020  
502347 *Escherichia albertii* TW07627

# 27

41514 *Salmonella enterica* subsp. *arizonae* serovar 62:z4,z23:-  
121723 *Photobacterium* sp. SKA34  
150340 *Vibrio* sp. Ex25  
198628 *Dickeya dadantii* 3937  
243265 *Photorhabdus luminescens* subsp. *laumondii* TT01  
300267 *Shigella dysenteriae* Sd197  
314290 *Vibrio* sp. MED222  
314292 *Photobacterium angustum* S14  
439843 *Salmonella enterica* subsp. *enterica* serovar *Schwarzengrund* str. CVM19633  
500639 *Enterobacter cancerogenus* ATCC 35316

# 28

121723 *Photobacterium* sp. SKA34  
150340 *Vibrio* sp. Ex25  
198628 *Dickeya dadantii* 3937  
216895 *Vibrio vulnificus* CMCP6  
218491 *Pectobacterium atrosepticum* SCRI1043  
243265 *Photorhabdus luminescens* subsp. *laumondii* TT01  
300267 *Shigella dysenteriae* Sd197  
314290 *Vibrio* sp. MED222  
439847 *Salmonella enterica* subsp. *enterica* serovar *Saintpaul* str. SARA29  
500639 *Enterobacter cancerogenus* ATCC 35316

# 29

216895 *Vibrio vulnificus* CMCP6

218491 *Pectobacterium atrosepticum* SCRI1043  
290339 *Cronobacter sakazakii* ATCC BAA-894  
291112 *Photobacterium asymbiotica*  
360102 *Yersinia pestis* Antiqua  
406818 *Xenorhabdus bovienii* SS-2004  
410291 *Vibrio harveyi* HY01  
561231 *Pectobacterium wasabiae* WPP163  
575788 *Vibrio splendidus* LGP32  
585034 *Escherichia coli* IAI1

# 30

41514 *Salmonella enterica* subsp. *arizonae* serovar 62:z4,z23:-  
121723 *Photobacterium* sp. SKA34  
150340 *Vibrio* sp. Ex25  
198628 *Dickeya dadantii* 3937  
243265 *Photobacterium luminescens* subsp. *laumondii* TT01  
300267 *Shigella dysenteriae* Sd197  
314290 *Vibrio* sp. MED222  
439847 *Salmonella enterica* subsp. *enterica* serovar Saintpaul str. SARA29  
500639 *Enterobacter cancerogenus* ATCC 35316  
521000 *Providencia rettgeri* DSM 1131

# 31

243277 *Vibrio cholerae* O1 biovar El Tor str. N16961  
312309 *Vibrio fischeri* ES114  
314289 *Vibrio* sp. AND4  
316275 *Aliivibrio salmonicida* LFI1238  
349965 *Yersinia intermedia* ATCC 29909  
417397 *Vibrio cholerae* 623-39  
500637 *Providencia rustigianii* DSM 4541  
550538 *Salmonella enterica* subsp. *enterica* serovar Gallinarum str. 287/91  
579405 *Dickeya dadantii* Ech703  
634503 *Edwardsiella ictaluri* 93-146

# 32

37762 *Escherichia coli* B  
121723 *Photobacterium* sp. SKA34  
150340 *Vibrio* sp. Ex25  
216895 *Vibrio vulnificus* CMCP6  
218491 *Pectobacterium atrosepticum* SCRI1043  
290339 *Cronobacter sakazakii* ATCC BAA-894  
291112 *Photobacterium asymbiotica*  
360102 *Yersinia pestis* Antiqua

382245 *Aeromonas salmonicida* subsp. *salmonicida* A449  
575788 *Vibrio splendidus* LGP32

# 33

198215 *Shigella flexneri* 2a str. 2457T  
214092 *Yersinia pestis* C092  
314289 *Vibrio* sp. AND4  
316275 *Aliivibrio salmonicida* LFI1238  
349965 *Yersinia intermedia* ATCC 29909  
393305 *Yersinia enterocolitica* subsp. *enterocolitica* 8081  
417399 *Vibrio cholerae* NCTC 8457  
520999 *Providencia alcalifaciens* DSM 30120  
550538 *Salmonella enterica* subsp. *enterica* serovar *Gallinarum* str. 287/91  
579405 *Dickeya dadantii* Ech703

# 34

121723 *Photobacterium* sp. SKA34  
198628 *Dickeya dadantii* 3937  
216895 *Vibrio vulnificus* CMCP6  
218491 *Pectobacterium atrosepticum* SCRI1043  
290339 *Cronobacter sakazakii* ATCC BAA-894  
291112 *Photobacterium asymbiotica*  
314290 *Vibrio* sp. MED222  
382245 *Aeromonas salmonicida* subsp. *salmonicida* A449  
404217 *Yersinia pestis* biovar *Orientalis* str. MG05-1020  
502347 *Escherichia albertii* TW07627

# 35

216895 *Vibrio vulnificus* CMCP6  
218491 *Pectobacterium atrosepticum* SCRI1043  
290339 *Cronobacter sakazakii* ATCC BAA-894  
291112 *Photobacterium asymbiotica*  
360102 *Yersinia pestis* Antiqua  
382245 *Aeromonas salmonicida* subsp. *salmonicida* A449  
406818 *Xenorhabdus bovienii* SS-2004  
410291 *Vibrio harveyi* HY01  
561231 *Pectobacterium wasabiae* WPP163  
575788 *Vibrio splendidus* LGP32

# 36

290339 *Cronobacter sakazakii* ATCC BAA-894  
291112 *Photobacterium asymbiotica*

360102 *Yersinia pestis* Antiqua  
382245 *Aeromonas salmonicida* subsp. *salmonicida* A449  
406818 *Xenorhabdus bovienii* SS-2004  
410291 *Vibrio harveyi* HY01  
558270 *Pectobacterium carotovorum* subsp. *carotovorum* WPP14  
561231 *Pectobacterium wasabiae* WPP163  
575788 *Vibrio splendidus* LGP32  
706191 *Pantoea ananatis* LMG 20103

# 37

349967 *Yersinia mollaretii* ATCC 43969  
349968 *Yersinia bercovieri* ATCC 43970  
417400 *Vibrio cholerae* B33  
465817 *Erwinia tasmaniensis* Et1/99  
498217 *Edwardsiella tarda* EIB202  
529507 *Proteus mirabilis* HI4320  
579112 *Vibrio cholerae* M66-2  
634499 *Erwinia pyrifoliae* Ep1/96  
637386 *Yersinia pestis* Z176003  
665029 *Erwinia amylovora* CFBP1430

# 38

214092 *Yersinia pestis* C092  
349966 *Yersinia frederiksenii* ATCC 33641  
380703 *Aeromonas hydrophila* subsp. *hydrophila* ATCC 7966  
388396 *Vibrio fischeri* MJ11  
393305 *Yersinia enterocolitica* subsp. *enterocolitica* 8081  
481805 *Escherichia coli* ATCC 8739  
520999 *Providencia alcalifaciens* DSM 30120  
561229 *Dickeya zeae* Ech1591  
590409 *Dickeya dadantii* Ech586  
693216 *Cronobacter turicensis* z3032

# 39

214092 *Yersinia pestis* C092  
314289 *Vibrio* sp. AND4  
373384 *Shigella flexneri* 5 str. 8401  
380703 *Aeromonas hydrophila* subsp. *hydrophila* ATCC 7966  
388396 *Vibrio fischeri* MJ11  
393305 *Yersinia enterocolitica* subsp. *enterocolitica* 8081  
417399 *Vibrio cholerae* NCTC 8457  
520999 *Providencia alcalifaciens* DSM 30120  
550538 *Salmonella enterica* subsp. *enterica* serovar *Gallinarum* str. 287/91



579405 *Dickeya dadantii* Ech703

# 40

349966 *Yersinia frederiksenii* ATCC 33641  
380703 *Aeromonas hydrophila* subsp. *hydrophila* ATCC 7966  
406818 *Xenorhabdus bovienii* SS-2004  
410291 *Vibrio harveyi* HY01  
481805 *Escherichia coli* ATCC 8739  
550537 *Salmonella enterica* subsp. *enterica* serovar *Enteritidis* str. P125109  
558270 *Pectobacterium carotovorum* subsp. *carotovorum* WPP14  
561229 *Dickeya zeae* Ech1591  
693216 *Cronobacter turicensis* z3032  
706191 *Pantoea ananatis* LMG 20103

# 41

349966 *Yersinia frederiksenii* ATCC 33641  
380703 *Aeromonas hydrophila* subsp. *hydrophila* ATCC 7966  
399742 *Enterobacter* sp. 638  
406818 *Xenorhabdus bovienii* SS-2004  
481805 *Escherichia coli* ATCC 8739  
550537 *Salmonella enterica* subsp. *enterica* serovar *Enteritidis* str. P125109  
558270 *Pectobacterium carotovorum* subsp. *carotovorum* WPP14  
561229 *Dickeya zeae* Ech1591  
693216 *Cronobacter turicensis* z3032  
706191 *Pantoea ananatis* LMG 20103

# 42

349966 *Yersinia frederiksenii* ATCC 33641  
380703 *Aeromonas hydrophila* subsp. *hydrophila* ATCC 7966  
399742 *Enterobacter* sp. 638  
406818 *Xenorhabdus bovienii* SS-2004  
481805 *Escherichia coli* ATCC 8739  
550537 *Salmonella enterica* subsp. *enterica* serovar *Enteritidis* str. P125109  
558270 *Pectobacterium carotovorum* subsp. *carotovorum* WPP14  
590409 *Dickeya dadantii* Ech586  
693216 *Cronobacter turicensis* z3032  
706191 *Pantoea ananatis* LMG 20103

# 43

60480 *Shewanella* sp. MR-4  
314289 *Vibrio* sp. AND4  
316275 *Aliivibrio salmonicida* LFI1238

318161 *Shewanella denitrificans* OS217  
323850 *Shewanella loihica* PV-4  
349967 *Yersinia mollaretii* ATCC 43969  
500637 *Providencia rustigianii* DSM 4541  
550540 *Ferrimonas balearica* DSM 9799  
593588 *Vibrio cholerae* MJ-1236  
634503 *Edwardsiella ictaluri* 93-146

# 44

121723 *Photobacterium* sp. SKA34  
216895 *Vibrio vulnificus* CMCP6  
218491 *Pectobacterium atrosepticum* SCRI1043  
290339 *Cronobacter sakazakii* ATCC BAA-894  
291112 *Photobacterium* sp. asymbiotica  
325240 *Shewanella baltica* OS155  
360102 *Yersinia pestis* Antiqua  
382245 *Aeromonas salmonicida* subsp. *salmonicida* A449  
425104 *Shewanella sediminis* HAW-EB3  
575788 *Vibrio splendidus* LGP32

# 45

121723 *Photobacterium* sp. SKA34  
216895 *Vibrio vulnificus* CMCP6  
218491 *Pectobacterium atrosepticum* SCRI1043  
290339 *Cronobacter sakazakii* ATCC BAA-894  
291112 *Photobacterium* sp. asymbiotica  
325240 *Shewanella baltica* OS155  
360102 *Yersinia pestis* Antiqua  
382245 *Aeromonas salmonicida* subsp. *salmonicida* A449  
575788 *Vibrio splendidus* LGP32  
637905 *Shewanella violacea* DSS12

# 46

218491 *Pectobacterium atrosepticum* SCRI1043  
290339 *Cronobacter sakazakii* ATCC BAA-894  
291112 *Photobacterium* sp. asymbiotica  
325240 *Shewanella baltica* OS155  
382245 *Aeromonas salmonicida* subsp. *salmonicida* A449  
404217 *Yersinia pestis* biovar *Orientalis* str. MG05-1020  
410291 *Vibrio harveyi* HY01  
458817 *Shewanella halifaxensis* HAW-EB4  
575788 *Vibrio splendidus* LGP32  
637905 *Shewanella violacea* DSS12

# 47

216895 *Vibrio vulnificus* CMCP6  
218491 *Pectobacterium atrosepticum* SCRI1043  
290339 *Cronobacter sakazakii* ATCC BAA-894  
291112 *Photobacterium damela* strain 395  
325240 *Shewanella baltica* OS155  
360102 *Yersinia pestis* Antiqua  
382245 *Aeromonas salmonicida* subsp. *salmonicida* A449  
410291 *Vibrio harveyi* HY01  
575788 *Vibrio splendidus* LGP32  
637905 *Shewanella violacea* DSS12

# 48

218491 *Pectobacterium atrosepticum* SCRI1043  
290339 *Cronobacter sakazakii* ATCC BAA-894  
291112 *Photobacterium damela* strain 395  
382245 *Aeromonas salmonicida* subsp. *salmonicida* A449  
402882 *Shewanella baltica* OS185  
404215 *Yersinia pestis* biovar *Antiqua* str. B42003004  
406818 *Xenorhabdus bovienii* SS-2004  
410291 *Vibrio harveyi* HY01  
458817 *Shewanella halifaxensis* HAW-EB4  
637905 *Shewanella violacea* DSS12

# 49

290339 *Cronobacter sakazakii* ATCC BAA-894  
291112 *Photobacterium damela* strain 395  
314608 *Shewanella benthica* KT99  
382245 *Aeromonas salmonicida* subsp. *salmonicida* A449  
402882 *Shewanella baltica* OS185  
404214 *Yersinia pestis* biovar *Orientalis* str. F1991016  
406818 *Xenorhabdus bovienii* SS-2004  
410291 *Vibrio harveyi* HY01  
458817 *Shewanella halifaxensis* HAW-EB4  
558270 *Pectobacterium carotovorum* subsp. *carotovorum* WPP14

# 50

243277 *Vibrio cholerae* O1 biovar *El Tor* str. N16961  
314289 *Vibrio* sp. AND4  
316275 *Aliivibrio salmonicida* LFI1238  
323850 *Shewanella loihica* PV-4

349965 *Yersinia intermedia* ATCC 29909  
500637 *Providencia rustigianii* DSM 4541  
550538 *Salmonella enterica* subsp. *enterica* serovar *Gallinarum* str. 287/91  
550540 *Ferrimonas balearica* DSM 9799  
579405 *Dickeya dadantii* Ech703  
634503 *Edwardsiella ictaluri* 93-146

# 51

60480 *Shewanella* sp. MR-4  
156578 *Alteromonadales* bacterium TW-7  
314289 *Vibrio* sp. AND4  
316275 *Aliivibrio salmonicida* LFI1238  
318161 *Shewanella denitrificans* OS217  
323850 *Shewanella loihica* PV-4  
349967 *Yersinia mollaretii* ATCC 43969  
500637 *Providencia rustigianii* DSM 4541  
550540 *Ferrimonas balearica* DSM 9799  
634503 *Edwardsiella ictaluri* 93-146

# 52

60480 *Shewanella* sp. MR-4  
198215 *Shigella flexneri* 2a str. 2457T  
314289 *Vibrio* sp. AND4  
316275 *Aliivibrio salmonicida* LFI1238  
318167 *Shewanella frigidimarina* NCIMB 400  
386656 *Yersinia pestis* *Pestoides* F  
417399 *Vibrio cholerae* NCTC 8457  
520999 *Providencia alcalifaciens* DSM 30120  
550538 *Salmonella enterica* subsp. *enterica* serovar *Gallinarum* str. 287/91  
579405 *Dickeya dadantii* Ech703

# 53

94122 *Shewanella* sp. ANA-3  
314608 *Shewanella benthica* KT99  
349966 *Yersinia frederiksenii* ATCC 33641  
406818 *Xenorhabdus bovienii* SS-2004  
410291 *Vibrio harveyi* HY01  
458817 *Shewanella halifaxensis* HAW-EB4  
558270 *Pectobacterium carotovorum* subsp. *carotovorum* WPP14  
561229 *Dickeya zeae* Ech1591  
693216 *Cronobacter turicensis* z3032  
706191 *Pantoea ananatis* LMG 20103

# 54

318161 *Shewanella denitrificans* OS217  
326297 *Shewanella amazonensis* SB2B  
349968 *Yersinia bercovieri* ATCC 43970  
465817 *Erwinia tasmaniensis* Et1/99  
498217 *Edwardsiella tarda* EIB202  
529507 *Proteus mirabilis* HI4320  
579112 *Vibrio cholerae* M66-2  
634499 *Erwinia pyrifoliae* Ep1/96  
637386 *Yersinia pestis* Z176003  
665029 *Erwinia amylovora* CFBP1430

# 55

87626 *Pseudoalteromonas tunicata* D2  
121723 *Photobacterium* sp. SKA34  
216895 *Vibrio vulnificus* CMCP6  
218491 *Pectobacterium atrosepticum* SCRI1043  
290339 *Cronobacter sakazakii* ATCC BAA-894  
291112 *Photobacterium asymbiotica*  
325240 *Shewanella baltica* OS155  
382245 *Aeromonas salmonicida* subsp. *salmonicida* A449  
404217 *Yersinia pestis* biovar *Orientalis* str. MG05-1020  
637905 *Shewanella violacea* DSS12

# 56

87626 *Pseudoalteromonas tunicata* D2  
218491 *Pectobacterium atrosepticum* SCRI1043  
290339 *Cronobacter sakazakii* ATCC BAA-894  
291112 *Photobacterium asymbiotica*  
325240 *Shewanella baltica* OS155  
360102 *Yersinia pestis* Antiqua  
382245 *Aeromonas salmonicida* subsp. *salmonicida* A449  
410291 *Vibrio harveyi* HY01  
575788 *Vibrio splendidus* LGP32  
637905 *Shewanella violacea* DSS12

# 57

218491 *Pectobacterium atrosepticum* SCRI1043  
290339 *Cronobacter sakazakii* ATCC BAA-894  
342610 *Pseudoalteromonas atlantica* T6c  
382245 *Aeromonas salmonicida* subsp. *salmonicida* A449  
402882 *Shewanella baltica* OS185

404215 *Yersinia pestis* biovar Antiqua str. B42003004  
406818 *Xenorhabdus bovienii* SS-2004  
410291 *Vibrio harveyi* HY01  
458817 *Shewanella halifaxensis* HAW-EB4  
637905 *Shewanella violacea* DSS12

# 58

290339 *Cronobacter sakazakii* ATCC BAA-894  
314608 *Shewanella benthica* KT99  
342610 *Pseudoalteromonas atlantica* T6c  
360099 *Yersinia pestis* biovar Antiqua str. E1979001  
382245 *Aeromonas salmonicida* subsp. *salmonicida* A449  
402882 *Shewanella baltica* OS185  
406818 *Xenorhabdus bovienii* SS-2004  
410291 *Vibrio harveyi* HY01  
458817 *Shewanella halifaxensis* HAW-EB4  
558270 *Pectobacterium carotovorum* subsp. *carotovorum* WPP14

# 59

60481 *Shewanella* sp. MR-7  
214092 *Yersinia pestis* C092  
314275 *Alteromonas macleodii* str. 'Deep ecotype'  
318167 *Shewanella frigidimarina* NCIMB 400  
380703 *Aeromonas hydrophila* subsp. *hydrophila* ATCC 7966  
388396 *Vibrio fischeri* MJ11  
417399 *Vibrio cholerae* NCTC 8457  
520999 *Providencia alcalifaciens* DSM 30120  
550538 *Salmonella enterica* subsp. *enterica* serovar Gallinarum str. 287/91  
579405 *Dickeya dadantii* Ech703

# 60

290339 *Cronobacter sakazakii* ATCC BAA-894  
291112 *Photobacterium asymbiotica*  
314608 *Shewanella benthica* KT99  
342610 *Pseudoalteromonas atlantica* T6c  
360102 *Yersinia pestis* Antiqua  
402882 *Shewanella baltica* OS185  
406818 *Xenorhabdus bovienii* SS-2004  
410291 *Vibrio harveyi* HY01  
458817 *Shewanella halifaxensis* HAW-EB4  
558270 *Pectobacterium carotovorum* subsp. *carotovorum* WPP14

# 61

94122 *Shewanella* sp. ANA-3  
314608 *Shewanella benthica* KT99  
342610 *Pseudoalteromonas atlantica* T6c  
349966 *Yersinia frederiksenii* ATCC 33641  
406818 *Xenorhabdus bovienii* SS-2004  
410291 *Vibrio harveyi* HY01  
458817 *Shewanella halifaxensis* HAW-EB4  
558270 *Pectobacterium carotovorum* subsp. *carotovorum* WPP14  
561229 *Dickeya zeae* Ech1591  
693216 *Cronobacter turicensis* z3032

# 62

167879 *Colwellia psychrerythraea* 34H  
196600 *Vibrio vulnificus* YJ016  
223926 *Vibrio parahaemolyticus* RIMD 2210633  
225849 *Shewanella piezotolerans* WP3  
290338 *Citrobacter koseri* ATCC BAA-895  
375450 *Yersinia pestis* FV-1  
392500 *Shewanella woodyi* ATCC 51908  
399741 *Serratia proteamaculans* 568  
585035 *Escherichia coli* S88  
640131 *Klebsiella variicola* At-22

# 63

167879 *Colwellia psychrerythraea* 34H  
196600 *Vibrio vulnificus* YJ016  
223926 *Vibrio parahaemolyticus* RIMD 2210633  
225849 *Shewanella piezotolerans* WP3  
290338 *Citrobacter koseri* ATCC BAA-895  
375450 *Yersinia pestis* FV-1  
392500 *Shewanella woodyi* ATCC 51908  
399741 *Serratia proteamaculans* 568  
585035 *Escherichia coli* S88  
637910 *Citrobacter rodentium* ICC168

# 64

314608 *Shewanella benthica* KT99  
342610 *Pseudoalteromonas atlantica* T6c  
404216 *Yersinia pestis* biovar *Mediaevalis* str. K1973002  
406818 *Xenorhabdus bovienii* SS-2004  
410291 *Vibrio harveyi* HY01  
458817 *Shewanella halifaxensis* HAW-EB4

558270 *Pectobacterium carotovorum* subsp. *carotovorum* WPP14  
561229 *Dickeya zeae* Ech1591  
693216 *Cronobacter turicensis* z3032  
706191 *Pantoea ananatis* LMG 20103

# 65

314608 *Shewanella benthica* KT99  
342610 *Pseudoalteromonas atlantica* T6c  
349966 *Yersinia frederiksenii* ATCC 33641  
406818 *Xenorhabdus bovienii* SS-2004  
410291 *Vibrio harveyi* HY01  
458817 *Shewanella halifaxensis* HAW-EB4  
558270 *Pectobacterium carotovorum* subsp. *carotovorum* WPP14  
561229 *Dickeya zeae* Ech1591  
693216 *Cronobacter turicensis* z3032  
706191 *Pantoea ananatis* LMG 20103

# 66

167879 *Colwellia psychrerythraea* 34H  
196600 *Vibrio vulnificus* YJ016  
225849 *Shewanella piezotolerans* WP3  
290338 *Citrobacter koseri* ATCC BAA-895  
399741 *Serratia proteamaculans* 568  
409438 *Escherichia coli* SE11  
444451 *Escherichia coli* O157:H7 str. EC4196  
454167 *Salmonella enterica* subsp. *enterica* serovar *Javiana* str. GA\_MM04042433  
637910 *Citrobacter rodentium* ICC168  
640131 *Klebsiella variicola* At-22

# 67

205921 *Streptococcus agalactiae* A909  
210007 *Streptococcus mutans* UA159  
299768 *Streptococcus thermophilus* CNRZ1066  
349123 *Lactobacillus reuteri* 100-23  
362948 *Lactobacillus salivarius* UCC118  
365659 *Streptococcus mitis* B6  
370552 *Streptococcus pyogenes* MGAS10270  
453363 *Streptococcus pneumoniae* SP195  
553482 *Streptococcus equi* subsp. *equi* 4047  
568814 *Streptococcus suis* BM407

# 68



198466 *Streptococcus pyogenes* MGAS315  
210007 *Streptococcus mutans* UA159  
264199 *Streptococcus thermophilus* LMG 18311  
293653 *Streptococcus pyogenes* MGAS5005  
314315 *Lactobacillus sakei* subsp. *sakei* 23K  
319701 *Streptococcus pyogenes* MGAS6180  
453363 *Streptococcus pneumoniae* SP195  
552526 *Streptococcus equi* subsp. *zooepidemicus* MGCS10565  
557436 *Lactobacillus reuteri* DSM 20016  
568813 *Streptococcus suis* SC84

# 69

40041 *Streptococcus equi* subsp. *zooepidemicus*  
198466 *Streptococcus pyogenes* MGAS315  
264199 *Streptococcus thermophilus* LMG 18311  
272621 *Lactobacillus acidophilus* NCFM  
293653 *Streptococcus pyogenes* MGAS5005  
314315 *Lactobacillus sakei* subsp. *sakei* 23K  
453363 *Streptococcus pneumoniae* SP195  
511691 *Streptococcus mutans* NN2025  
557436 *Lactobacillus reuteri* DSM 20016  
568813 *Streptococcus suis* SC84

# 70

40041 *Streptococcus equi* subsp. *zooepidemicus*  
264199 *Streptococcus thermophilus* LMG 18311  
272621 *Lactobacillus acidophilus* NCFM  
286636 *Streptococcus pyogenes* MGAS10394  
314315 *Lactobacillus sakei* subsp. *sakei* 23K  
334390 *Lactobacillus fermentum* IFO 3956  
453364 *Streptococcus pneumoniae* CDC0288-04  
511691 *Streptococcus mutans* NN2025  
557436 *Lactobacillus reuteri* DSM 20016  
568813 *Streptococcus suis* SC84

# 71

170187 *Streptococcus pneumoniae* TIGR4  
171101 *Streptococcus pneumoniae* R6  
203120 *Leuconostoc mesenteroides* subsp. *mesenteroides* ATCC 8293  
211110 *Streptococcus agalactiae* NEM316  
362948 *Lactobacillus salivarius* UCC118  
365659 *Streptococcus mitis* B6  
453362 *Streptococcus pneumoniae* CDC1873-00

467705 *Streptococcus gordonii* str. Challis substr. CH1  
486410 *Streptococcus dysgalactiae* subsp. *equisimilis* GGS\_124  
748671 *Lactobacillus crispatus* ST1

# 72

203120 *Leuconostoc mesenteroides* subsp. *mesenteroides* ATCC 8293  
205921 *Streptococcus agalactiae* A909  
362948 *Lactobacillus salivarius* UCC118  
365659 *Streptococcus mitis* B6  
453365 *Streptococcus pneumoniae* CDC3059-06  
467705 *Streptococcus gordonii* str. Challis substr. CH1  
488223 *Streptococcus pneumoniae* P1031  
553482 *Streptococcus equi* subsp. *equi* 4047  
561276 *Streptococcus pneumoniae* ATCC 700669  
748671 *Lactobacillus crispatus* ST1

# 73

203120 *Leuconostoc mesenteroides* subsp. *mesenteroides* ATCC 8293  
205921 *Streptococcus agalactiae* A909  
362948 *Lactobacillus salivarius* UCC118  
365659 *Streptococcus mitis* B6  
453362 *Streptococcus pneumoniae* CDC1873-00  
453365 *Streptococcus pneumoniae* CDC3059-06  
467705 *Streptococcus gordonii* str. Challis substr. CH1  
486410 *Streptococcus dysgalactiae* subsp. *equisimilis* GGS\_124  
553482 *Streptococcus equi* subsp. *equi* 4047  
748671 *Lactobacillus crispatus* ST1

# 74

203120 *Leuconostoc mesenteroides* subsp. *mesenteroides* ATCC 8293  
205921 *Streptococcus agalactiae* A909  
349123 *Lactobacillus reuteri* 100-23  
362948 *Lactobacillus salivarius* UCC118  
365659 *Streptococcus mitis* B6  
370552 *Streptococcus pyogenes* MGAS10270  
467705 *Streptococcus gordonii* str. Challis substr. CH1  
553482 *Streptococcus equi* subsp. *equi* 4047  
561276 *Streptococcus pneumoniae* ATCC 700669  
748671 *Lactobacillus crispatus* ST1

# 75

203120 *Leuconostoc mesenteroides* subsp. *mesenteroides* ATCC 8293

205921 *Streptococcus agalactiae* A909  
210007 *Streptococcus mutans* UA159  
349123 *Lactobacillus reuteri* 100-23  
362948 *Lactobacillus salivarius* UCC118  
370552 *Streptococcus pyogenes* MGAS10270  
453363 *Streptococcus pneumoniae* SP195  
553482 *Streptococcus equi* subsp. *equi* 4047  
568814 *Streptococcus suis* BM407  
748671 *Lactobacillus crispatus* ST1

# 76

203122 *Saccharophagus degradans* 2-40  
314275 *Alteromonas macleodii* str. 'Deep ecotype'  
314285 *Congregibacter litoralis* KT71  
314289 *Vibrio* sp. AND4  
318167 *Shewanella frigidimarina* NCIMB 400  
377628 *Yersinia pestis* Nepal516  
379731 *Pseudomonas stutzeri* A1501  
380703 *Aeromonas hydrophila* subsp. *hydrophila* ATCC 7966  
388396 *Vibrio fischeri* MJ11  
443152 *Marinobacter algicola* DG893

# 77

203122 *Saccharophagus degradans* 2-40  
314275 *Alteromonas macleodii* str. 'Deep ecotype'  
314285 *Congregibacter litoralis* KT71  
318167 *Shewanella frigidimarina* NCIMB 400  
377628 *Yersinia pestis* Nepal516  
379731 *Pseudomonas stutzeri* A1501  
380703 *Aeromonas hydrophila* subsp. *hydrophila* ATCC 7966  
388396 *Vibrio fischeri* MJ11  
443152 *Marinobacter algicola* DG893  
520999 *Providencia alcalifaciens* DSM 30120

# 78

156578 *Alteromonadales bacterium* TW-7  
314285 *Congregibacter litoralis* KT71  
314289 *Vibrio* sp. AND4  
316275 *Aliivibrio salmonicida* LFI1238  
318161 *Shewanella denitrificans* OS217  
323850 *Shewanella loihica* PV-4  
405416 *Acinetobacter baumannii* ACICU  
498211 *Cellvibrio japonicus* Ueda107

550540 *Ferrimonas balearica* DSM 9799  
634503 *Edwardsiella ictaluri* 93-146

# 79

314283 *Reinekea blandensis* MED297  
314608 *Shewanella benthica* KT99  
342610 *Pseudoalteromonas atlantica* T6c  
360099 *Yersinia pestis* biovar Antiqua str. E1979001  
377629 *Teredinibacter turnerae* T7901  
379731 *Pseudomonas stutzeri* A1501  
380703 *Aeromonas hydrophila* subsp. *hydrophila* ATCC 7966  
406818 *Xenorhabdus bovienii* SS-2004  
443152 *Marinobacter algicola* DG893  
558270 *Pectobacterium carotovorum* subsp. *carotovorum* WPP14

# 80

314283 *Reinekea blandensis* MED297  
314608 *Shewanella benthica* KT99  
342610 *Pseudoalteromonas atlantica* T6c  
360099 *Yersinia pestis* biovar Antiqua str. E1979001  
377629 *Teredinibacter turnerae* T7901  
379731 *Pseudomonas stutzeri* A1501  
380703 *Aeromonas hydrophila* subsp. *hydrophila* ATCC 7966  
406818 *Xenorhabdus bovienii* SS-2004  
410291 *Vibrio harveyi* HY01  
443152 *Marinobacter algicola* DG893

# 81

314283 *Reinekea blandensis* MED297  
342610 *Pseudoalteromonas atlantica* T6c  
351348 *Marinobacter aquaeolei* VT8  
377629 *Teredinibacter turnerae* T7901  
382245 *Aeromonas salmonicida* subsp. *salmonicida* A449  
400668 *Marinomonas* sp. MWYL1  
406818 *Xenorhabdus bovienii* SS-2004  
410291 *Vibrio harveyi* HY01  
502801 *Yersinia pseudotuberculosis* PB1/+  
637905 *Shewanella violacea* DSS12

# 82

314283 *Reinekea blandensis* MED297  
314608 *Shewanella benthica* KT99

342610 *Pseudoalteromonas atlantica* T6c  
351348 *Marinobacter aquaeolei* VT8  
377629 *Teredinibacter turnerae* T7901  
382245 *Aeromonas salmonicida* subsp. *salmonicida* A449  
400668 *Marinomonas* sp. MWYL1  
406818 *Xenorhabdus bovienii* SS-2004  
410291 *Vibrio harveyi* HY01  
502801 *Yersinia pseudotuberculosis* PB1/+

# 83

156578 *Alteromonadales bacterium* TW-7  
207954 *Neptuniibacter caesariensis*  
318161 *Shewanella denitrificans* OS217  
498211 *Cellvibrio japonicus* Ueda107  
509173 *Acinetobacter baumannii* AYE  
529507 *Proteus mirabilis* HI4320  
550540 *Ferrimonas balearica* DSM 9799  
579112 *Vibrio cholerae* M66-2  
634499 *Erwinia pyrifoliae* Ep1/96  
637386 *Yersinia pestis* Z176003

# 84

218491 *Pectobacterium atrosepticum* SCRI1043  
291112 *Photorhabdus asymbiotica*  
325240 *Shewanella baltica* OS155  
342610 *Pseudoalteromonas atlantica* T6c  
349747 *Yersinia pseudotuberculosis* IP 31758  
351348 *Marinobacter aquaeolei* VT8  
382245 *Aeromonas salmonicida* subsp. *salmonicida* A449  
400668 *Marinomonas* sp. MWYL1  
410291 *Vibrio harveyi* HY01  
637905 *Shewanella violacea* DSS12

# 85

246200 *Ruegeria pomeroyi* DSS-3  
252305 *Oceanicola batsensis* HTCC2597  
272943 *Rhodobacter sphaeroides* 2.4.1  
290400 *Jannaschia* sp. CCS1  
314253 *Nitrobacter* sp. Nb-311A  
323097 *Nitrobacter hamburgensis* X14  
351016 *Roseobacter* sp. AzwK-3b  
391624 *Oceanibulbus indolifex* HEL-45  
398580 *Dinoroseobacter shibae* DFL 12

411684 *Hoeflea phototrophica* DFL-43

# 86

290339 *Cronobacter sakazakii* ATCC BAA-894  
314283 *Reinekea blandensis* MED297  
314608 *Shewanella benthica* KT99  
342610 *Pseudoalteromonas atlantica* T6c  
351348 *Marinobacter aquaeolei* VT8  
377629 *Teredinibacter turnerae* T7901  
402882 *Shewanella baltica* OS185  
404214 *Yersinia pestis* biovar *Orientalis* str. F1991016  
406818 *Xenorhabdus bovienii* SS-2004  
410291 *Vibrio harveyi* HY01

# 87

207954 *Neptuniibacter caesariensis*  
318161 *Shewanella denitrificans* OS217  
326297 *Shewanella amazonensis* SB2B  
349967 *Yersinia mollaretii* ATCC 43969  
498211 *Cellvibrio japonicus* Ueda107  
498217 *Edwardsiella tarda* EIB202  
509173 *Acinetobacter baumannii* AYE  
529507 *Proteus mirabilis* HI4320  
579112 *Vibrio cholerae* M66-2  
634499 *Erwinia pyrifoliae* Ep1/96

# 88

87626 *Pseudoalteromonas tunicata* D2  
121723 *Photobacterium* sp. SKA34  
150340 *Vibrio* sp. Ex25  
198628 *Dickeya dadantii* 3937  
243265 *Photorhabdus luminescens* subsp. *laumondii* TT01  
344609 *Shigella boydii* CDC 3083-94  
399599 *Shewanella baltica* OS195  
399739 *Pseudomonas mendocina* ymp  
425104 *Shewanella sediminis* HAW-EB3  
521000 *Providencia rettgeri* DSM 1131

# 89

314283 *Reinekea blandensis* MED297  
314608 *Shewanella benthica* KT99  
342610 *Pseudoalteromonas atlantica* T6c

351348 *Marinobacter aquaeolei* VT8  
377629 *Teredinibacter turnerae* T7901  
404216 *Yersinia pestis* biovar *Mediaevalis* str. K1973002  
406818 *Xenorhabdus bovienii* SS-2004  
410291 *Vibrio harveyi* HY01  
558270 *Pectobacterium carotovorum* subsp. *carotovorum* WPP14  
693216 *Cronobacter turicensis* z3032

# 90

246200 *Ruegeria pomeroyi* DSS-3  
252305 *Oceanicola batsensis* HTCC2597  
272943 *Rhodobacter sphaeroides* 2.4.1  
290400 *Jannaschia* sp. CCS1  
314253 *Nitrobacter* sp. Nb-311A  
351016 *Roseobacter* sp. AzwK-3b  
375451 *Roseobacter denitrificans* OCh 114  
391613 *Roseovarius* sp. TM1035  
398580 *Dinoroseobacter shibae* DFL 12  
509190 *Caulobacter segnis* ATCC 21756

# 91

279238 *Novosphingobium aromaticivorans* DSM 12444  
292414 *Ruegeria* sp. TM1040  
314231 *Fulvimarina pelagi* HTCC2506  
314256 *Oceanicola granulosus* HTCC2516  
314266 *Sphingomonas* sp. SKA58  
395963 *Beijerinckia indica* subsp. *indica* ATCC 9039  
395965 *Methylocella silvestris* BL2  
450851 *Phenylobacterium zucineum* HLK1  
504832 *Oligotropha carboxidovorans* OM5  
565050 *Caulobacter crescentus* NA1000

# 92

190650 *Caulobacter crescentus* CB15  
292414 *Ruegeria* sp. TM1040  
314231 *Fulvimarina pelagi* HTCC2506  
314256 *Oceanicola granulosus* HTCC2516  
314266 *Sphingomonas* sp. SKA58  
395963 *Beijerinckia indica* subsp. *indica* ATCC 9039  
395965 *Methylocella silvestris* BL2  
450851 *Phenylobacterium zucineum* HLK1  
504832 *Oligotropha carboxidovorans* OM5  
565050 *Caulobacter crescentus* NA1000

# 93

62977 *Acinetobacter* sp. ADP1  
204773 *Herminiimonas arsenicoxydans*  
207949 *Bermanella marisrubri*  
290398 *Chromohalobacter salexigens* DSM 3043  
360910 *Bordetella avium* 197N  
391597 *Limnobacter* sp. MED105  
396588 *Thioalkalivibrio sulfidophilus* HL-EbGr7  
400667 *Acinetobacter baumannii* ATCC 17978  
557598 *Laribacter hongkongensis* HLHK9  
572477 *Allochromatium vinosum* DSM 180

# 94

269796 *Rhodospirillum rubrum* ATCC 11170  
279238 *Novosphingobium aromaticivorans* DSM 12444  
292414 *Ruegeria* sp. TM1040  
314266 *Sphingomonas* sp. SKA58  
314267 *Sulfitobacter* sp. NAS-14.1  
395965 *Methylocella silvestris* BL2  
414684 *Rhodospirillum centenum* SW  
450851 *Phenylobacterium zucineum* HLK1  
504832 *Oligotropha carboxidovorans* OM5  
565050 *Caulobacter crescentus* NA1000

# 95

62977 *Acinetobacter* sp. ADP1  
204773 *Herminiimonas arsenicoxydans*  
207949 *Bermanella marisrubri*  
290398 *Chromohalobacter salexigens* DSM 3043  
391597 *Limnobacter* sp. MED105  
396588 *Thioalkalivibrio sulfidophilus* HL-EbGr7  
400667 *Acinetobacter baumannii* ATCC 17978  
400673 *Legionella pneumophila* str. Corby  
557598 *Laribacter hongkongensis* HLHK9  
572477 *Allochromatium vinosum* DSM 180

# 96

62977 *Acinetobacter* sp. ADP1  
204773 *Herminiimonas arsenicoxydans*  
207949 *Bermanella marisrubri*  
290398 *Chromohalobacter salexigens* DSM 3043



297246 *Legionella pneumophila* str. Paris  
391597 *Limnobacter* sp. MED105  
396588 *Thioalkalivibrio sulfidophilus* HL-EbGr7  
400673 *Legionella pneumophila* str. Corby  
557598 *Laribacter hongkongensis* HLHK9  
572477 *Allochromatium vinosum* DSM 180

# 97

190650 *Caulobacter crescentus* CB15  
269796 *Rhodospirillum rubrum* ATCC 11170  
292414 *Ruegeria* sp. TM1040  
314231 *Fulvimarina pelagi* HTCC2506  
314256 *Oceanicola granulosus* HTCC2516  
314266 *Sphingomonas* sp. SKA58  
395963 *Beijerinckia indica* subsp. *indica* ATCC 9039  
395965 *Methylocella silvestris* BL2  
450851 *Phenylobacterium zucineum* HLK1  
504832 *Oligotropha carboxidovorans* OM5

# 98

269796 *Rhodospirillum rubrum* ATCC 11170  
279238 *Novosphingobium aromaticivorans* DSM 12444  
292414 *Ruegeria* sp. TM1040  
314231 *Fulvimarina pelagi* HTCC2506  
314256 *Oceanicola granulosus* HTCC2516  
314266 *Sphingomonas* sp. SKA58  
395963 *Beijerinckia indica* subsp. *indica* ATCC 9039  
450851 *Phenylobacterium zucineum* HLK1  
504832 *Oligotropha carboxidovorans* OM5  
565050 *Caulobacter crescentus* NA1000

# 99

156578 *Alteromonadales bacterium* TW-7  
207954 *Neptuniibacter caesariensis*  
312309 *Vibrio fischeri* ES114  
318161 *Shewanella denitrificans* OS217  
472759 *Nitrosococcus halophilus* Nc4  
498211 *Cellvibrio japonicus* Ueda107  
509173 *Acinetobacter baumannii* AYE  
550540 *Ferrimonas balearica* DSM 9799  
634503 *Edwardsiella ictaluri* 93-146  
637386 *Yersinia pestis* Z176003

# 100

156578 *Alteromonadales bacterium* TW-7  
314285 *Congregibacter litoralis* KT71  
314289 *Vibrio* sp. AND4  
316275 *Aliivibrio salmonicida* LFI1238  
318161 *Shewanella denitrificans* OS217  
405416 *Acinetobacter baumannii* ACICU  
472759 *Nitrosococcus halophilus* Nc4  
498211 *Cellvibrio japonicus* Ueda107  
550540 *Ferrimonas balearica* DSM 9799  
634503 *Edwardsiella ictaluri* 93-146

# 101

60480 *Shewanella* sp. MR-4  
156578 *Alteromonadales bacterium* TW-7  
314285 *Congregibacter litoralis* KT71  
314289 *Vibrio* sp. AND4  
316275 *Aliivibrio salmonicida* LFI1238  
323850 *Shewanella loihica* PV-4  
472759 *Nitrosococcus halophilus* Nc4  
480119 *Acinetobacter baumannii* AB0057  
550540 *Ferrimonas balearica* DSM 9799  
634503 *Edwardsiella ictaluri* 93-146

# 102

262698 *Brucella abortus* bv. 1 str. 9-941  
314225 *Erythrobacter litoralis* HTCC2594  
314232 *Loktanella vestfoldensis* SKA53  
314254 *Oceanicaulis* sp. HTCC2633  
323098 *Nitrobacter winogradskyi* Nb-255  
359391 *Brucella melitensis* biovar Abortus 2308  
394221 *Maricaulis maris* MCS10  
430066 *Brucella abortus* S19  
546272 *Brucella melitensis* ATCC 23457  
634452 *Acetobacter pasteurianus* IFO 3283-01

# 103

224914 *Brucella melitensis* bv. 1 str. 16M  
237727 *Erythrobacter* sp. NAP1  
262698 *Brucella abortus* bv. 1 str. 9-941  
314232 *Loktanella vestfoldensis* SKA53  
317655 *Sphingopyxis alaskensis* RB2256

323098 *Nitrobacter winogradskyi* Nb-255  
394221 *Maricaulis maris* MCS10  
546272 *Brucella melitensis* ATCC 23457  
582402 *Hirschia baltica* ATCC 49814  
634452 *Acetobacter pasteurianus* IFO 3283-01

# 104

354 *Azotobacter vinelandii*  
58051 *Moritella* sp. PE36  
270374 *Marinobacter* sp. ELB17  
314277 *Marinomonas* sp. MED121  
314288 *Vibrio alginolyticus* 12G01  
375450 *Yersinia pestis* FV-1  
392500 *Shewanella woodyi* ATCC 51908  
521000 *Providencia rettgeri* DSM 1131  
585057 *Escherichia coli* IAI39  
870187 *Thiothrix nivea* DSM 5205

# 105

87626 *Pseudoalteromonas tunicata* D2  
121723 *Photobacterium* sp. SKA34  
198628 *Dickeya dadantii* 3937  
216895 *Vibrio vulnificus* CMCP6  
300269 *Shigella sonnei* Ss046  
382245 *Aeromonas salmonicida* subsp. *salmonicida* A449  
399739 *Pseudomonas mendocina* ymp  
400668 *Marinomonas* sp. MWYL1  
425104 *Shewanella sediminis* HAW-EB3  
870187 *Thiothrix nivea* DSM 5205

# 106

203122 *Saccharophagus degradans* 2-40  
291331 *Xanthomonas oryzae* pv. *oryzae* KACC 10331  
314275 *Alteromonas macleodii* str. 'Deep ecotype'  
318167 *Shewanella frigidimarina* NCIMB 400  
349746 *Yersinia pestis* Angola  
379731 *Pseudomonas stutzeri* A1501  
380703 *Aeromonas hydrophila* subsp. *hydrophila* ATCC 7966  
388396 *Vibrio fischeri* MJ11  
391008 *Stenotrophomonas maltophilia* R551-3  
443152 *Marinobacter algicola* DG893

# 107

354 *Azotobacter vinelandii*  
58051 *Moritella* sp. PE36  
270374 *Marinobacter* sp. ELB17  
314277 *Marinomonas* sp. MED121  
314288 *Vibrio alginolyticus* 12G01  
316273 *Xanthomonas campestris* pv. *vesicatoria* str. 85-10  
399599 *Shewanella baltica* OS195  
405955 *Escherichia coli* APEC 01  
521000 *Providencia rettgeri* DSM 1131  
870187 *Thiothrix nivea* DSM 5205

# 108

62977 *Acinetobacter* sp. ADP1  
204773 *Herminiimonas arsenicoxydans*  
207949 *Bermanella marisrubri*  
290398 *Chromohalobacter salexigens* DSM 3043  
345075 *Vibrio cholerae* V51  
360910 *Bordetella avium* 197N  
391597 *Limnobacter* sp. MED105  
396588 *Thioalkalivibrio sulfidophilus* HL-EbGr7  
400667 *Acinetobacter baumannii* ATCC 17978  
661367 *Legionella longbeachae* NSW150

# 109

76114 *Aromatoleum aromaticum* EbN1  
87626 *Pseudoalteromonas tunicata* D2  
216895 *Vibrio vulnificus* CMCP6  
362663 *Escherichia coli* 536  
399739 *Pseudomonas mendocina* ymp  
425104 *Shewanella sediminis* HAW-EB3  
509169 *Xanthomonas campestris* pv. *campestris* str. B100  
522306 *Candidatus Accumulibacter phosphatis* clade IIA str. UW-1  
564066 *Ralstonia solanacearum* IPO1609  
870187 *Thiothrix nivea* DSM 5205

# 110

87626 *Pseudoalteromonas tunicata* D2  
243365 *Chromobacterium violaceum* ATCC 12472  
314290 *Vibrio* sp. MED222  
338969 *Rhodospirillum rubrum* T118  
342109 *Xanthomonas oryzae* pv. *oryzae* MAFF 311018  
399739 *Pseudomonas mendocina* ymp

400668 *Marinomonas* sp. MWYL1  
425104 *Shewanella sediminis* HAW-EB3  
522306 *Candidatus Accumulibacter phosphatis* clade IIA str. UW-1  
564066 *Ralstonia solanacearum* IP01609

# 111

87626 *Pseudoalteromonas tunicata* D2  
150340 *Vibrio* sp. Ex25  
243365 *Chromobacterium violaceum* ATCC 12472  
338969 *Rhodoferrax ferrireducens* T118  
342109 *Xanthomonas oryzae* pv. *oryzae* MAFF 311018  
399739 *Pseudomonas mendocina* ymp  
400668 *Marinomonas* sp. MWYL1  
425104 *Shewanella sediminis* HAW-EB3  
522306 *Candidatus Accumulibacter phosphatis* clade IIA str. UW-1  
564066 *Ralstonia solanacearum* IP01609

# 112

87626 *Pseudoalteromonas tunicata* D2  
190486 *Xanthomonas axonopodis* pv. *citri* str. 306  
243365 *Chromobacterium violaceum* ATCC 12472  
291112 *Photorhabdus asymbiotica*  
338969 *Rhodoferrax ferrireducens* T118  
399739 *Pseudomonas mendocina* ymp  
400668 *Marinomonas* sp. MWYL1  
425104 *Shewanella sediminis* HAW-EB3  
522306 *Candidatus Accumulibacter phosphatis* clade IIA str. UW-1  
564066 *Ralstonia solanacearum* IP01609

# 113

159087 *Dechloromonas aromatica* RCB  
232721 *Acidovorax* sp. JS42  
257311 *Bordetella parapertussis* 12822  
291331 *Xanthomonas oryzae* pv. *oryzae* KACC 10331  
314275 *Alteromonas macleodii* str. 'Deep ecotype'  
318167 *Shewanella frigidimarina* NCIMB 400  
360099 *Yersinia pestis* biovar *Antiqua* str. E1979001  
379731 *Pseudomonas stutzeri* A1501  
443152 *Marinobacter algicola* DG893  
536230 *Burkholderia pseudomallei* MSHR346

# 114

87626 *Pseudoalteromonas tunicata* D2  
150340 *Vibrio* sp. Ex25  
243365 *Chromobacterium violaceum* ATCC 12472  
338969 *Rhodospirillum rubrum* T118  
342109 *Xanthomonas oryzae* pv. *oryzae* MAFF 311018  
382245 *Aeromonas salmonicida* subsp. *salmonicida* A449  
400668 *Marinomonas* sp. MWYL1  
425104 *Shewanella sediminis* HAW-EB3  
522306 *Candidatus Accumulibacter phosphatis* clade IIA str. UW-1  
564066 *Ralstonia solanacearum* IP01609

# 115

159087 *Dechloromonas aromatica* RCB  
203122 *Saccharophagus degradans* 2-40  
232721 *Acidovorax* sp. JS42  
291331 *Xanthomonas oryzae* pv. *oryzae* KACC 10331  
314275 *Alteromonas macleodii* str. 'Deep ecotype'  
318167 *Shewanella frigidimarina* NCIMB 400  
377628 *Yersinia pestis* Nepal516  
379731 *Pseudomonas stutzeri* A1501  
443152 *Marinobacter algicola* DG893  
536230 *Burkholderia pseudomallei* MSHR346

# 116

243365 *Chromobacterium violaceum* ATCC 12472  
291112 *Photobacterium asymbiotica*  
338969 *Rhodospirillum rubrum* T118  
342109 *Xanthomonas oryzae* pv. *oryzae* MAFF 311018  
342110 *Ralstonia solanacearum* UW551  
342610 *Pseudoalteromonas atlantica* T6c  
351348 *Marinobacter aquaeolei* VT8  
377629 *Teredinibacter turnerae* T7901  
400668 *Marinomonas* sp. MWYL1  
637905 *Shewanella violacea* DSS12

# 117

159087 *Dechloromonas aromatica* RCB  
232721 *Acidovorax* sp. JS42  
291331 *Xanthomonas oryzae* pv. *oryzae* KACC 10331  
314283 *Reinekea blandensis* MED297  
314608 *Shewanella benthica* KT99  
377629 *Teredinibacter turnerae* T7901  
379731 *Pseudomonas stutzeri* A1501

443152 *Marinobacter algicola* DG893  
502800 *Yersinia pseudotuberculosis* YPIII  
536230 *Burkholderia pseudomallei* MSHR346

# 118

354 *Azotobacter vinelandii*  
243265 *Photobacterium luminescens* subsp. *laumondii* TT01  
270374 *Marinobacter* sp. ELB17  
314277 *Marinomonas* sp. MED121  
314288 *Vibrio alginolyticus* 12G01  
316273 *Xanthomonas campestris* pv. *vesicatoria* str. 85-10  
334803 *Burkholderia mallei* JHU  
392500 *Shewanella woodyi* ATCC 51908  
688245 *Comamonas testosteroni* CNB-2  
870187 *Thiothrix nivea* DSM 5205

# 119

243365 *Chromobacterium violaceum* ATCC 12472  
314283 *Reinekea blandensis* MED297  
314608 *Shewanella benthica* KT99  
338969 *Rhodospirillum rubrum* T118  
342109 *Xanthomonas oryzae* pv. *oryzae* MAFF 311018  
342610 *Pseudoalteromonas atlantica* T6c  
351348 *Marinobacter aquaeolei* VT8  
377629 *Teredinibacter turnerae* T7901  
400668 *Marinomonas* sp. MWYL1  
561230 *Pectobacterium carotovorum* subsp. *carotovorum* PC1

# 120

243365 *Chromobacterium violaceum* ATCC 12472  
314283 *Reinekea blandensis* MED297  
314608 *Shewanella benthica* KT99  
338969 *Rhodospirillum rubrum* T118  
342109 *Xanthomonas oryzae* pv. *oryzae* MAFF 311018  
342610 *Pseudoalteromonas atlantica* T6c  
351348 *Marinobacter aquaeolei* VT8  
377629 *Teredinibacter turnerae* T7901  
400668 *Marinomonas* sp. MWYL1  
561231 *Pectobacterium wasabiae* WPP163

# 121

58051 *Moritella* sp. PE36

314277 *Marinomonas* sp. MED121  
314288 *Vibrio alginolyticus* 12G01  
316273 *Xanthomonas campestris* pv. *vesicatoria* str. 85-10  
334803 *Burkholderia mallei* JHU  
399599 *Shewanella baltica* OS195  
399739 *Pseudomonas mendocina* ymp  
585057 *Escherichia coli* IAI39  
688245 *Comamonas testosteroni* CNB-2  
870187 *Thiothrix nivea* DSM 5205

# 122

243365 *Chromobacterium violaceum* ATCC 12472  
314283 *Reinekea blandensis* MED297  
314608 *Shewanella benthica* KT99  
342109 *Xanthomonas oryzae* pv. *oryzae* MAFF 311018  
349747 *Yersinia pseudotuberculosis* IP 31758  
351348 *Marinobacter aquaeolei* VT8  
377629 *Teredinibacter turnerae* T7901  
395495 *Leptothrix cholodnii* SP-6  
410291 *Vibrio harveyi* HY01  
536230 *Burkholderia pseudomallei* MSHR346

# 123

159087 *Dechloromonas aromatica* RCB  
232721 *Acidovorax* sp. JS42  
291331 *Xanthomonas oryzae* pv. *oryzae* KACC 10331  
314283 *Reinekea blandensis* MED297  
314608 *Shewanella benthica* KT99  
351348 *Marinobacter aquaeolei* VT8  
377629 *Teredinibacter turnerae* T7901  
410291 *Vibrio harveyi* HY01  
502801 *Yersinia pseudotuberculosis* PB1/+  
536230 *Burkholderia pseudomallei* MSHR346

# 124

243365 *Chromobacterium violaceum* ATCC 12472  
314283 *Reinekea blandensis* MED297  
314608 *Shewanella benthica* KT99  
338969 *Rhodiferax ferrireducens* T118  
342109 *Xanthomonas oryzae* pv. *oryzae* MAFF 311018  
342610 *Pseudoalteromonas atlantica* T6c  
351348 *Marinobacter aquaeolei* VT8  
377629 *Teredinibacter turnerae* T7901



410291 *Vibrio harveyi* HY01  
558270 *Pectobacterium carotovorum* subsp. *carotovorum* WPP14

# 125

167879 *Colwellia psychrerythraea* 34H  
196600 *Vibrio vulnificus* YJ016  
205918 *Pseudomonas syringae* pv. *syringae* B728a  
270374 *Marinobacter* sp. ELB17  
334802 *Burkholderia mallei* FMH  
340100 *Bordetella petrii* DSM 12804  
360094 *Xanthomonas oryzae* pv. *oryzae* PX099A  
365044 *Polaromonas naphthalenivorans* CJ2  
392500 *Shewanella woodyi* ATCC 51908  
399741 *Serratia proteamaculans* 568

# 126

257311 *Bordetella parapertussis* 12822  
314283 *Reinekea blandensis* MED297  
314608 *Shewanella benthica* KT99  
342109 *Xanthomonas oryzae* pv. *oryzae* MAFF 311018  
349747 *Yersinia pseudotuberculosis* IP 31758  
351348 *Marinobacter aquaeolei* VT8  
377629 *Teredinibacter turnerae* T7901  
395495 *Leptothrix cholodnii* SP-6  
410291 *Vibrio harveyi* HY01  
536230 *Burkholderia pseudomallei* MSHR346

# 127

58051 *Moritella* sp. PE36  
314277 *Marinomonas* sp. MED121  
314288 *Vibrio alginolyticus* 12G01  
316273 *Xanthomonas campestris* pv. *vesicatoria* str. 85-10  
334803 *Burkholderia mallei* JHU  
362663 *Escherichia coli* 536  
399599 *Shewanella baltica* OS195  
521000 *Providencia rettgeri* DSM 1131  
688245 *Comamonas testosteroni* CNB-2  
870187 *Thiothrix nivea* DSM 5205

# 128

257313 *Bordetella pertussis* Tohama I  
314278 *Nitrococcus mobilis* Nb-231

326442 *Pseudoalteromonas haloplanktis* TAC125  
357804 *Psychromonas ingrahamii* 37  
360910 *Bordetella avium* 197N  
412967 *Vibrio cholerae* MAK 757  
417398 *Vibrio cholerae* MZO-2  
535289 *Acidovorax ebreus* TPSY  
557600 *Acinetobacter baumannii* AB307-0294  
661367 *Legionella longbeachae* NSW150

# 129

167879 *Colwellia psychrerythraea* 34H  
196600 *Vibrio vulnificus* YJ016  
205918 *Pseudomonas syringae* pv. *syringae* B728a  
243160 *Burkholderia mallei* ATCC 23344  
340100 *Bordetella petrii* DSM 12804  
360094 *Xanthomonas oryzae* pv. *oryzae* PX099A  
365044 *Polaromonas naphthalenivorans* CJ2  
391735 *Verminephrobacter eiseniae* EF01-2  
392500 *Shewanella woodyi* ATCC 51908  
399741 *Serratia proteamaculans* 568

# 130

205922 *Pseudomonas fluorescens* Pf0-1  
296591 *Polaromonas* sp. JS666  
298386 *Photobacterium profundum* SS9  
314280 *Photobacterium profundum* 3TCK  
350704 *Pseudomonas aeruginosa* C3719  
360118 *Burkholderia pseudomallei* 406e  
399795 *Comamonas testosteroni* KF-1  
419109 *Vibrio parahaemolyticus* AQ3810  
444450 *Escherichia coli* O157:H7 str. EC4115  
546231 *Pseudomonas syringae* pv. *tomato* T1

# 131

160488 *Pseudomonas putida* KT2440  
199310 *Escherichia coli* CFT073  
296591 *Polaromonas* sp. JS666  
314291 *Vibrio splendidus* 12B01  
331109 *Burkholderia pseudomallei* 1655  
350701 *Burkholderia dolosa* AU0158  
391591 *Vibrio shilonii* AK1  
399795 *Comamonas testosteroni* KF-1  
428406 *Ralstonia pickettii* 12D

484021 *Klebsiella pneumoniae* subsp. *pneumoniae* NTUH-K2044

# 132

257313 *Bordetella pertussis* Tohama I  
314278 *Nitrococcus mobilis* Nb-231  
326442 *Pseudoalteromonas haloplanktis* TAC125  
357804 *Psychromonas ingrahamii* 37  
412967 *Vibrio cholerae* MAK 757  
417398 *Vibrio cholerae* MZO-2  
535289 *Acidovorax ebreus* TPSY  
557600 *Acinetobacter baumannii* AB307-0294  
661367 *Legionella longbeachae* NSW150  
716540 *Erwinia amylovora* ATCC 49946

# 133

122586 *Neisseria meningitidis* MC58  
183190 *Xylella fastidiosa* Temecula1  
259536 *Psychrobacter arcticus* 273-4  
312153 *Polynucleobacter necessarius* subsp. *asymbioticus* QLW-P1DMWA-1  
339671 *Actinobacillus succinogenes* 130Z  
374833 *Neisseria meningitidis* 053442  
405440 *Xylella fastidiosa* M12  
434271 *Actinobacillus pleuropneumoniae* serovar 3 str. JL03  
434922 *Coxiella burnetii* Dugway 5J108-111  
557723 *Haemophilus parasuis* SH0165

# 134

257313 *Bordetella pertussis* Tohama I  
314278 *Nitrococcus mobilis* Nb-231  
326442 *Pseudoalteromonas haloplanktis* TAC125  
349968 *Yersinia bercovieri* ATCC 43970  
357804 *Psychromonas ingrahamii* 37  
412967 *Vibrio cholerae* MAK 757  
498217 *Edwardsiella tarda* EIB202  
535289 *Acidovorax ebreus* TPSY  
557600 *Acinetobacter baumannii* AB307-0294  
716540 *Erwinia amylovora* ATCC 49946

# 135

207954 *Neptuniibacter caesariensis*  
326297 *Shewanella amazonensis* SB2B  
357804 *Psychromonas ingrahamii* 37

375286 *Janthinobacterium* sp. Marseille  
498217 *Edwardsiella tarda* EIB202  
509173 *Acinetobacter baumannii* AYE  
529507 *Proteus mirabilis* HI4320  
579112 *Vibrio cholerae* M66-2  
637386 *Yersinia pestis* Z176003  
716540 *Erwinia amylovora* ATCC 49946

# 136

207954 *Neptuniibacter caesariensis*  
326297 *Shewanella amazonensis* SB2B  
349968 *Yersinia bercovieri* ATCC 43970  
375286 *Janthinobacterium* sp. Marseille  
498217 *Edwardsiella tarda* EIB202  
509173 *Acinetobacter baumannii* AYE  
529507 *Proteus mirabilis* HI4320  
579112 *Vibrio cholerae* M66-2  
634499 *Erwinia pyrifoliae* Ep1/96  
637386 *Yersinia pestis* Z176003

# 137

195103 *Clostridium perfringens* ATCC 13124  
370438 *Pelotomaculum thermopropionicum* SI  
393130 *Listeria monocytogenes* J0161  
411489 *Clostridium* sp. L2-50  
451640 *Catenibacterium mitsuokai* DSM 15897  
457570 *Natronaerobius thermophilus* JW/NM-WN-LF  
492476 *Clostridium thermocellum* JW20  
498761 *Heliobacterium modesticaldum* Ice1  
572544 *Ilyobacter polytropus* DSM 2926  
697281 *Mahella australiensis* 50-1 BON

# 138

314278 *Nitrococcus mobilis* Nb-231  
326442 *Pseudoalteromonas haloplanktis* TAC125  
349968 *Yersinia bercovieri* ATCC 43970  
357804 *Psychromonas ingrahamii* 37  
412967 *Vibrio cholerae* MAK 757  
465817 *Erwinia tasmaniensis* Et1/99  
498217 *Edwardsiella tarda* EIB202  
535289 *Acidovorax ebreus* TPSY  
557600 *Acinetobacter baumannii* AB307-0294  
716540 *Erwinia amylovora* ATCC 49946

# 139

122587 *Neisseria meningitidis* Z2491  
228400 *Haemophilus somnus* 2336  
242231 *Neisseria gonorrhoeae* FA 1090  
272831 *Neisseria meningitidis* FAM18  
351581 *Francisella tularensis* subsp. *holarctica* FSC200  
360115 *Coxiella burnetii* RSA 331  
374928 *Haemophilus influenzae* PittAA  
374932 *Haemophilus influenzae* PittHH  
375177 *Haemophilus influenzae* 3655  
484022 *Francisella philomiragia* subsp. *philomiragia* ATCC 25017

# 140

28187 *Acetohalobium arabaticum*  
373903 *Halothermothrix orenii* H 168  
386415 *Clostridium novyi* NT  
393132 *Listeria monocytogenes* L028  
399726 *Thermoanaerobacter* sp. X514  
428127 *Eubacterium dolichum* DSM 3991  
445971 *Anaerofustis stercorihominis* DSM 17244  
644966 *Thermaerobacter marianensis* DSM 12885  
656914 *Desulfonispota thiosulfatigenes* DSM 11270  
714315 *Leptotrichia goodfellowii* DSM 19756

# 141

28187 *Acetohalobium arabaticum*  
212717 *Clostridium tetani* E88  
373903 *Halothermothrix orenii* H 168  
393132 *Listeria monocytogenes* L028  
399726 *Thermoanaerobacter* sp. X514  
428127 *Eubacterium dolichum* DSM 3991  
445971 *Anaerofustis stercorihominis* DSM 17244  
546271 *Selenomonas sputigena* ATCC 35185  
656914 *Desulfonispota thiosulfatigenes* DSM 11270  
867903 *Thermaerobacter subterraneus* DSM 13965

# 142

195103 *Clostridium perfringens* ATCC 13124  
267409 *Listeria monocytogenes* serotype 1/2a str. F6854  
350688 *Alkaliphilus oremlandii* OhILAs  
370438 *Pelotomaculum thermopropionicum* SI

411489 *Clostridium* sp. L2-50  
451640 *Catenibacterium mitsuokai* DSM 15897  
457570 *Natranaerobius thermophilus* JW/NM-WN-LF  
492476 *Clostridium thermocellum* JW20  
572544 *Ilyobacter polytropus* DSM 2926  
697281 *Mahella australiensis* 50-1 BON

# 143

28187 *Acetohalobium arabaticum*  
212717 *Clostridium tetani* E88  
264732 *Moorella thermoacetica* ATCC 39073  
393132 *Listeria monocytogenes* L028  
399726 *Thermoanaerobacter* sp. X514  
428126 *Clostridium spiroforme* DSM 1552  
428127 *Eubacterium dolichum* DSM 3991  
546271 *Selenomonas sputigena* ATCC 35185  
656914 *Desulfonispota thiosulfatigenes* DSM 11270  
867903 *Thermaerobacter subterraneus* DSM 13965

# 144

370438 *Pelotomaculum thermopropionicum* SI  
411489 *Clostridium* sp. L2-50  
451640 *Catenibacterium mitsuokai* DSM 15897  
451756 *Clostridium perfringens* CPE str. F4969  
457570 *Natranaerobius thermophilus* JW/NM-WN-LF  
498761 *Heliobacterium modesticaldum* Ice1  
543302 *Alicyclobacillus acidocaldarius* LAA1  
572544 *Ilyobacter polytropus* DSM 2926  
637381 *Listeria monocytogenes* 08-5923  
697281 *Mahella australiensis* 50-1 BON

# 145

183190 *Xylella fastidiosa* Temecula1  
228400 *Haemophilus somnus* 2336  
242231 *Neisseria gonorrhoeae* FA 1090  
272843 *Pasteurella multocida* subsp. *multocida* str. Pm70  
312153 *Polynucleobacter necessarius* subsp. *asymbioticus* QLW-P1DMWA-1  
351581 *Francisella tularensis* subsp. *holarctica* FSC200  
374933 *Haemophilus influenzae* PittII  
434271 *Actinobacillus pleuropneumoniae* serovar 3 str. JL03  
434922 *Coxiella burnetii* Dugway 5J108-111  
557723 *Haemophilus parasuis* SH0165

# 146

169963 *Listeria monocytogenes* EGD-e  
195103 *Clostridium perfringens* ATCC 13124  
265669 *Listeria monocytogenes* serotype 4b str. F2365  
350688 *Alkaliphilus oremlandii* OhILAs  
370438 *Pelotomaculum thermopropionicum* SI  
411489 *Clostridium* sp. L2-50  
457570 *Natranaerobius thermophilus* JW/NM-WN-LF  
491915 *Anoxybacillus flavithermus* WK1  
572544 *Ilyobacter polytropus* DSM 2926  
697281 *Mahella australiensis* 50-1 BON

# 147

195103 *Clostridium perfringens* ATCC 13124  
262543 *Exiguobacterium sibiricum* 255-15  
370438 *Pelotomaculum thermopropionicum* SI  
411489 *Clostridium* sp. L2-50  
451640 *Catenibacterium mitsuokai* DSM 15897  
457570 *Natranaerobius thermophilus* JW/NM-WN-LF  
498761 *Heliobacterium modesticaldum* Ice1  
572544 *Ilyobacter polytropus* DSM 2926  
637381 *Listeria monocytogenes* 08-5923  
697281 *Mahella australiensis* 50-1 BON

# 148

262543 *Exiguobacterium sibiricum* 255-15  
370438 *Pelotomaculum thermopropionicum* SI  
411489 *Clostridium* sp. L2-50  
451640 *Catenibacterium mitsuokai* DSM 15897  
457570 *Natranaerobius thermophilus* JW/NM-WN-LF  
498761 *Heliobacterium modesticaldum* Ice1  
543302 *Alicyclobacillus acidocaldarius* LAA1  
572544 *Ilyobacter polytropus* DSM 2926  
637381 *Listeria monocytogenes* 08-5923  
697281 *Mahella australiensis* 50-1 BON

# 149

28187 *Acetohalobium arabaticum*  
209882 *Fusobacterium nucleatum* subsp. *vincentii* ATCC 49256  
373903 *Halothermothrix orenii* H 168  
386415 *Clostridium novyi* NT  
393121 *Listeria monocytogenes* FSL J2-071

428127 *Eubacterium dolichum* DSM 3991  
445971 *Anaerofustis stercorihominis* DSM 17244  
500633 *Clostridium hiranonis* DSM 13275  
580331 *Thermoanaerobacter italicus* Ab9  
714315 *Leptotrichia goodfellowii* DSM 19756

# 150

264732 *Moorella thermoacetica* ATCC 39073  
273068 *Thermoanaerobacter tengcongensis* MB4  
289380 *Clostridium perfringens* SM101  
335541 *Syntrophomonas wolfei* subsp. *wolfei* str. Goettingen  
393128 *Listeria monocytogenes* F6900  
396513 *Staphylococcus carnosus* subsp. *carnosus* TM300  
428126 *Clostridium spiroforme* DSM 1552  
445337 *Clostridium botulinum* C str. Eklund  
445975 *Collinsella stercoris* DSM 13279  
748449 *Halobacteroides halobius* DSM 5150

# 151

28187 *Acetohalobium arabaticum*  
212717 *Clostridium tetani* E88  
333990 *Carnobacterium* sp. AT7  
373903 *Haloferoxylum orenii* H 168  
396513 *Staphylococcus carnosus* subsp. *carnosus* TM300  
399726 *Thermoanaerobacter* sp. X514  
428127 *Eubacterium dolichum* DSM 3991  
546271 *Selenomonas sputigena* ATCC 35185  
656914 *Desulfonitrospira thiosulfatigenes* DSM 11270  
867903 *Thermaerobacter subterraneus* DSM 13965

# 152

262543 *Exiguobacterium sibiricum* 255-15  
370438 *Pelotomaculum thermopropionicum* SI  
411489 *Clostridium* sp. L2-50  
451640 *Catenibacterium mitsuokai* DSM 15897  
451756 *Clostridium perfringens* CPE str. F4969  
498761 *Heliobacterium modesticaldum* Ice1  
543302 *Alicyclobacillus acidocaldarius* LAA1  
572544 *Ilyobacter polytropus* DSM 2926  
637381 *Listeria monocytogenes* 08-5923  
697281 *Mahella australiensis* 50-1 BON



# 153

195103 *Clostridium perfringens* ATCC 13124  
265669 *Listeria monocytogenes* serotype 4b str. F2365  
350688 *Alkaliphilus oremlandii* OhILAs  
370438 *Pelotomaculum thermopropionicum* SI  
393126 *Listeria monocytogenes* FSL R2-561  
393130 *Listeria monocytogenes* J0161  
411489 *Clostridium* sp. L2-50  
457570 *Natranaerobius thermophilus* JW/NM-WN-LF  
491915 *Anoxybacillus flavithermus* WK1  
572544 *Ilyobacter polytropus* DSM 2926

# 154

262543 *Exiguobacterium sibiricum* 255-15  
267410 *Listeria monocytogenes* serotype 4b str. H7858  
411474 *Coprococcus eutactus* ATCC 27759  
451640 *Catenibacterium mitsuokai* DSM 15897  
451756 *Clostridium perfringens* CPE str. F4969  
479437 *Eggerthella lenta* DSM 2243  
492476 *Clostridium thermocellum* JW20  
498761 *Heliobacterium modesticaldum* Ice1  
543302 *Alicyclobacillus acidocaldarius* LAA1  
697281 *Mahella australiensis* 50-1 BON

# 155

345219 *Bacillus coagulans* 36D1  
351627 *Caldicellulosiruptor saccharolyticus* DSM 8903  
393116 *Listeria monocytogenes* FSL F2-515  
401526 *Thermosinus carboxydivorans* Nor1  
428128 *Eubacterium siraeum* DSM 15702  
445973 *Clostridium bartlettii* DSM 16795  
451757 *Clostridium perfringens* NCTC 8239  
471855 *Slackia heliotrinireducens* DSM 20476  
500635 *Mitsuokella multacida* DSM 20544  
521460 *Caldicellulosiruptor bescii* DSM 6725

# 156

28187 *Acetohalobium arabaticum*  
212717 *Clostridium tetani* E88  
264732 *Moorella thermoacetica* ATCC 39073  
333990 *Carnobacterium* sp. AT7  
393132 *Listeria monocytogenes* L028  
396513 *Staphylococcus carnosus* subsp. *carnosus* TM300

428126 *Clostridium spiroforme* DSM 1552  
546271 *Selenomonas sputigena* ATCC 35185  
656914 *Desulfonispota thiosulfatigenes* DSM 11270  
867903 *Thermaerobacter subterraneus* DSM 13965

# 157

28187 *Acetohalobium arabaticum*  
373903 *Halothermothrix orenii* H 168  
386415 *Clostridium novyi* NT  
393132 *Listeria monocytogenes* L028  
399726 *Thermoanaerobacter* sp. X514  
445971 *Anaerofustis stercorihominis* DSM 17244  
584708 *Aminomonas paucivorans* DSM 12260  
644966 *Thermaerobacter marianensis* DSM 12885  
656914 *Desulfonispota thiosulfatigenes* DSM 11270  
714315 *Leptotrichia goodfellowii* DSM 19756

# 158

203119 *Clostridium thermocellum* ATCC 27405  
267410 *Listeria monocytogenes* serotype 4b str. H7858  
411484 *Clostridium* sp. SS2/1  
445334 *Clostridium perfringens* C str. JGS1495  
445974 *Clostridium ramosum* DSM 1402  
471223 *Geobacillus* sp. WCH70  
479437 *Eggerthella lenta* DSM 2243  
521098 *Alicyclobacillus acidocaldarius* subsp. *acidocaldarius* DSM 446  
537007 *Blautia hansenii* DSM 20583  
562970 *Kyrpidia tusciae* DSM 2912

# 159

246194 *Carboxydotherrmus hydrogenoformans* Z-2901  
273068 *Thermoanaerobacter tengcongensis* MB4  
279808 *Staphylococcus haemolyticus* JCSC1435  
289380 *Clostridium perfringens* SM101  
345219 *Bacillus coagulans* 36D1  
393128 *Listeria monocytogenes* F6900  
445337 *Clostridium botulinum* C str. Eklund  
451516 *Staphylococcus aureus* subsp. *aureus* USA300\_TCH1516  
500635 *Mitsuokella multacida* DSM 20544  
521460 *Caldicellulosiruptor bescii* DSM 6725

# 160

28187 *Acetohalobium arabaticum*  
212717 *Clostridium tetani* E88  
264732 *Moorella thermoacetica* ATCC 39073  
393132 *Listeria monocytogenes* L028  
399726 *Thermoanaerobacter* sp. X514  
428126 *Clostridium spiroforme* DSM 1552  
546271 *Selenomonas sputigena* ATCC 35185  
584708 *Aminomonas paucivorans* DSM 12260  
656914 *Desulfonispota thiosulfatigenes* DSM 11270  
867903 *Thermaerobacter subterraneus* DSM 13965

# 161

212717 *Clostridium tetani* E88  
264732 *Moorella thermoacetica* ATCC 39073  
273036 *Staphylococcus aureus* RF122  
333990 *Carnobacterium* sp. AT7  
335541 *Syntrophomonas wolfei* subsp. *wolfei* str. Goettingen  
393132 *Listeria monocytogenes* L028  
428126 *Clostridium spiroforme* DSM 1552  
546271 *Selenomonas sputigena* ATCC 35185  
656914 *Desulfonispota thiosulfatigenes* DSM 11270  
867903 *Thermaerobacter subterraneus* DSM 13965

# 162

262543 *Exiguobacterium sibiricum* 255-15  
267409 *Listeria monocytogenes* serotype 1/2a str. F6854  
411489 *Clostridium* sp. L2-50  
451640 *Catenibacterium mitsuokai* DSM 15897  
451756 *Clostridium perfringens* CPE str. F4969  
479437 *Eggerthella lenta* DSM 2243  
498761 *Heliobacterium modesticaldum* Ice1  
543302 *Alicyclobacillus acidocaldarius* LAA1  
572544 *Ilyobacter polytropus* DSM 2926  
697281 *Mahella australiensis* 50-1 BON

# 163

28187 *Acetohalobium arabaticum*  
212717 *Clostridium tetani* E88  
373903 *Halothermothrix orenii* H 168  
393132 *Listeria monocytogenes* L028  
399726 *Thermoanaerobacter* sp. X514  
428127 *Eubacterium dolichum* DSM 3991  
546271 *Selenomonas sputigena* ATCC 35185

584708 *Aminomonas paucivorans* DSM 12260  
656914 *Desulfonispota thiosulfatigenes* DSM 11270  
867903 *Thermaerobacter subterraneus* DSM 13965

# 164

246194 *Carboxydotherrmus hydrogenoformans* Z-2901  
273068 *Thermoanaerobacter tengcongensis* MB4  
279808 *Staphylococcus haemolyticus* JCSC1435  
289380 *Clostridium perfringens* SM101  
345219 *Bacillus coagulans* 36D1  
393127 *Listeria monocytogenes* Finland 1998  
428128 *Eubacterium siraeum* DSM 15702  
451516 *Staphylococcus aureus* subsp. *aureus* USA300\_TCH1516  
500635 *Mitsuokella multacida* DSM 20544  
521460 *Caldicellulosiruptor bescii* DSM 6725

# 165

212717 *Clostridium tetani* E88  
264732 *Moorella thermoacetica* ATCC 39073  
273036 *Staphylococcus aureus* RF122  
335541 *Syntrophomonas wolfei* subsp. *wolfei* str. Goettingen  
428126 *Clostridium spiroforme* DSM 1552  
445975 *Collinsella stercoris* DSM 13279  
518637 *Eubacterium bifforme* DSM 3989  
546271 *Selenomonas sputigena* ATCC 35185  
748449 *Halobacteroides halobius* DSM 5150  
867903 *Thermaerobacter subterraneus* DSM 13965

# 166

156578 *Alteromonadales bacterium* TW-7  
156889 *Magnetococcus marinus* MC-1  
312309 *Vibrio fischeri* ES114  
318161 *Shewanella denitrificans* OS217  
323850 *Shewanella loihica* PV-4  
472759 *Nitrosococcus halophilus* Nc4  
498211 *Cellvibrio japonicus* Ueda107  
509173 *Acinetobacter baumannii* AYE  
550540 *Ferrimonas balearica* DSM 9799  
634503 *Edwardsiella ictaluri* 93-146

# 167

176279 *Staphylococcus epidermidis* RP62A

264732 *Moorella thermoacetica* ATCC 39073  
273036 *Staphylococcus aureus* RF122  
335541 *Syntrophomonas wolfei* subsp. *wolfei* str. Goettingen  
342451 *Staphylococcus saprophyticus* subsp. *saprophyticus* ATCC 15305  
393117 *Listeria monocytogenes* FSL J1-194  
396513 *Staphylococcus carnosus* subsp. *carnosus* TM300  
546271 *Selenomonas sputigena* ATCC 35185  
698737 *Staphylococcus lugdunensis* HKU09-01  
867903 *Thermaerobacter subterraneus* DSM 13965

# 168

212717 *Clostridium tetani* E88  
273036 *Staphylococcus aureus* RF122  
335541 *Syntrophomonas wolfei* subsp. *wolfei* str. Goettingen  
428126 *Clostridium spiroforme* DSM 1552  
445975 *Collinsella stercoris* DSM 13279  
518637 *Eubacterium bifforme* DSM 3989  
546271 *Selenomonas sputigena* ATCC 35185  
656914 *Desulfonispota thiosulfatigenes* DSM 11270  
748449 *Halobacteroides halobius* DSM 5150  
867903 *Thermaerobacter subterraneus* DSM 13965

# 169

279808 *Staphylococcus haemolyticus* JCSC1435  
333849 *Enterococcus faecium* D0  
345219 *Bacillus coagulans* 36D1  
386043 *Listeria welshimeri* serovar 6b str. SLCC5334  
393116 *Listeria monocytogenes* FSL F2-515  
393119 *Listeria monocytogenes* FSL J1-208  
401526 *Thermosinus carboxydivorans* Nor1  
451516 *Staphylococcus aureus* subsp. *aureus* USA300\_TCH1516  
500635 *Mitsuokella multacida* DSM 20544  
683837 *Listeria seeligeri* serovar 1/2b str. SLCC3954

# 170

212717 *Clostridium tetani* E88  
373903 *Halothermothrix orenii* H 168  
393132 *Listeria monocytogenes* L028  
399726 *Thermoanaerobacter* sp. X514  
428127 *Eubacterium dolichum* DSM 3991  
445971 *Anaerofustis stercorihominis* DSM 17244  
546271 *Selenomonas sputigena* ATCC 35185  
584708 *Aminomonas paucivorans* DSM 12260

656914 *Desulfonispota thiosulfatigenes* DSM 11270  
867903 *Thermaerobacter subterraneus* DSM 13965

# 171

195103 *Clostridium perfringens* ATCC 13124  
321332 *Synechococcus* sp. JA-2-3B'a(2-13)  
350688 *Alkaliphilus oremlandii* OhILAs  
370438 *Pelotomaculum thermopropionicum* SI  
393126 *Listeria monocytogenes* FSL R2-561  
411489 *Clostridium* sp. L2-50  
457570 *Natranaerobius thermophilus* JW/NM-WN-LF  
491915 *Anoxybacillus flavithermus* WK1  
572544 *Ilyobacter polytropus* DSM 2926  
697281 *Mahella australiensis* 50-1 BON

# 172

195103 *Clostridium perfringens* ATCC 13124  
321332 *Synechococcus* sp. JA-2-3B'a(2-13)  
370438 *Pelotomaculum thermopropionicum* SI  
411489 *Clostridium* sp. L2-50  
451640 *Catenibacterium mitsuokai* DSM 15897  
457570 *Natranaerobius thermophilus* JW/NM-WN-LF  
498761 *Heliobacterium modesticaldum* Ice1  
572544 *Ilyobacter polytropus* DSM 2926  
637381 *Listeria monocytogenes* 08-5923  
697281 *Mahella australiensis* 50-1 BON

# 173

160492 *Xylella fastidiosa* 9a5c  
187272 *Alkalilimnicola ehrlichii* MLHE-1  
243233 *Methylococcus capsulatus* str. Bath  
272624 *Legionella pneumophila* subsp. *pneumophila* str. Philadelphia 1  
297245 *Legionella pneumophila* str. Lens  
314345 *Mariprofundus ferrooxydans* PV-1  
396595 *Thioalkalivibrio* sp. K90mix  
509170 *Acinetobacter baumannii* SDF  
582744 *Methylovorus glucosetrophus* SIP3-4  
716541 *Enterobacter cloacae* subsp. *cloacae* ATCC 13047

# 174

176279 *Staphylococcus epidermidis* RP62A  
264732 *Moorella thermoacetica* ATCC 39073

273036 *Staphylococcus aureus* RF122  
335541 *Syntrophomonas wolfei* subsp. *wolfei* str. Goettingen  
342451 *Staphylococcus saprophyticus* subsp. *saprophyticus* ATCC 15305  
393128 *Listeria monocytogenes* F6900  
396513 *Staphylococcus carnosus* subsp. *carnosus* TM300  
546271 *Selenomonas sputigena* ATCC 35185  
698737 *Staphylococcus lugdunensis* HKU09-01  
748449 *Halobacteroides halobius* DSM 5150

# 175

240015 *Acidobacterium capsulatum* ATCC 51196  
243231 *Geobacter sulfurreducens* PCA  
292459 *Symbiobacterium thermophilum* IAM 14863  
338963 *Pelobacter carbinolicus* DSM 2380  
394503 *Clostridium cellulolyticum* H10  
441771 *Clostridium botulinum* A str. Hall  
525897 *Desulfomicrobium baculatum* DSM 4028  
544556 *Geobacillus* sp. Y412MC61  
577650 *Desulfobulbus propionicus* DSM 2032  
645462 *Clostridium difficile* CD196

# 176

195103 *Clostridium perfringens* ATCC 13124  
321332 *Synechococcus* sp. JA-2-3B'a(2-13)  
350688 *Alkaliphilus oremlandii* OhILAs  
370438 *Pelotomaculum thermopropionicum* SI  
393130 *Listeria monocytogenes* J0161  
411489 *Clostridium* sp. L2-50  
451640 *Catenibacterium mitsuokai* DSM 15897  
457570 *Natronaerobius thermophilus* JW/NM-WN-LF  
572544 *Ilyobacter polytropus* DSM 2926  
697281 *Mahella australiensis* 50-1 BON

# 177

195103 *Clostridium perfringens* ATCC 13124  
265669 *Listeria monocytogenes* serotype 4b str. F2365  
321332 *Synechococcus* sp. JA-2-3B'a(2-13)  
350688 *Alkaliphilus oremlandii* OhILAs  
370438 *Pelotomaculum thermopropionicum* SI  
393126 *Listeria monocytogenes* FSL R2-561  
411489 *Clostridium* sp. L2-50  
457570 *Natronaerobius thermophilus* JW/NM-WN-LF  
491915 *Anoxybacillus flavithermus* WK1

572544 *Ilyobacter polytropus* DSM 2926

# 178

195102 *Clostridium perfringens* str. 13  
246194 *Carboxydotherrmus hydrogenoformans* Z-2901  
279808 *Staphylococcus haemolyticus* JCSC1435  
333849 *Enterococcus faecium* D0  
345219 *Bacillus coagulans* 36D1  
393127 *Listeria monocytogenes* Finland 1998  
418127 *Staphylococcus aureus* subsp. *aureus* Mu3  
428128 *Eubacterium siraeum* DSM 15702  
500635 *Mitsuokella multacida* DSM 20544  
521460 *Caldicellulosiruptor bescii* DSM 6725

# 179

28187 *Acetohalobium arabaticum*  
197221 *Thermosynechococcus elongatus* BP-1  
212717 *Clostridium tetani* E88  
264732 *Moorella thermoacetica* ATCC 39073  
393132 *Listeria monocytogenes* L028  
428126 *Clostridium spiroforme* DSM 1552  
546271 *Selenomonas sputigena* ATCC 35185  
584708 *Aminomonas paucivorans* DSM 12260  
656914 *Desulfonispota thiosulfatigenes* DSM 11270  
867903 *Thermaerobacter subterraneus* DSM 13965

# 180

883 *Desulfovibrio vulgaris* str. 'Miyazaki F'  
56780 *Syntrophus aciditrophicus* SB  
96561 *Desulfococcus oleovorans* Hxd3  
177439 *Desulfotalea psychrophila* LSv54  
204773 *Herminiimonas arsenicoxydans*  
281689 *Desulfuromonas acetoxidans* DSM 684  
396588 *Thioalkalivibrio sulfidophilus* HL-EbGr7  
557598 *Laribacter hongkongensis* HLHK9  
568815 *Brucella microti* CCM 4915  
572477 *Allochromatium vinosum* DSM 180

# 181

160492 *Xylella fastidiosa* 9a5c  
187272 *Alkalilimnicola ehrlichii* MLHE-1  
265072 *Methylobacillus flagellatus* KT



292415 *Thiobacillus denitrificans* ATCC 25259  
314345 *Mariprofundus ferrooxydans* PV-1  
323848 *Nitrosospira multiformis* ATCC 25196  
380394 *Acidithiobacillus ferrooxidans* ATCC 53993  
393595 *Alcanivorax borkumensis* SK2  
396595 *Thioalkalivibrio* sp. K90mix  
444178 *Brucella ovis* ATCC 25840

# 182

160492 *Xylella fastidiosa* 9a5c  
187272 *Alkalilimnicola ehrlichii* MLHE-1  
243233 *Methylococcus capsulatus* str. Bath  
292415 *Thiobacillus denitrificans* ATCC 25259  
297245 *Legionella pneumophila* str. Lens  
314345 *Mariprofundus ferrooxydans* PV-1  
380394 *Acidithiobacillus ferrooxidans* ATCC 53993  
396595 *Thioalkalivibrio* sp. K90mix  
444178 *Brucella ovis* ATCC 25840  
582744 *Methylovorus glucosetrophus* SIP3-4

# 183

411489 *Clostridium* sp. L2-50  
451640 *Catenibacterium mitsuokai* DSM 15897  
451756 *Clostridium perfringens* CPE str. F4969  
479437 *Eggerthella lenta* DSM 2243  
498761 *Heliobacterium modesticaldum* Ice1  
543302 *Alicyclobacillus acidocaldarius* LAA1  
572544 *Ilyobacter polytropus* DSM 2926  
637381 *Listeria monocytogenes* 08-5923  
697281 *Mahella australiensis* 50-1 BON  
866499 *Cloacibacillus evryensis* DSM 19522

# 184

882 *Desulfovibrio vulgaris* str. Hildenborough  
240015 *Acidobacterium capsulatum* ATCC 51196  
292459 *Symbiobacterium thermophilum* IAM 14863  
338963 *Pelobacter carbinolicus* DSM 2380  
394503 *Clostridium cellulolyticum* H10  
441771 *Clostridium botulinum* A str. Hall  
525897 *Desulfomicrobium baculatum* DSM 4028  
544556 *Geobacillus* sp. Y412MC61  
577650 *Desulfobulbus propionicus* DSM 2032  
645462 *Clostridium difficile* CD196

# 185

882 *Desulfovibrio vulgaris* str. Hildenborough  
240015 *Acidobacterium capsulatum* ATCC 51196  
292459 *Symbiobacterium thermophilum* IAM 14863  
338963 *Pelobacter carbinolicus* DSM 2380  
394503 *Clostridium cellulolyticum* H10  
396588 *Thioalkalivibrio sulfidophilus* HL-EbGr7  
441771 *Clostridium botulinum* A str. Hall  
544556 *Geobacillus* sp. Y412MC61  
577650 *Desulfobulbus propionicus* DSM 2032  
645991 *Syntrophobotulus glycolicus* DSM 8271

# 186

882 *Desulfovibrio vulgaris* str. Hildenborough  
240015 *Acidobacterium capsulatum* ATCC 51196  
292459 *Symbiobacterium thermophilum* IAM 14863  
338963 *Pelobacter carbinolicus* DSM 2380  
394503 *Clostridium cellulolyticum* H10  
396588 *Thioalkalivibrio sulfidophilus* HL-EbGr7  
441771 *Clostridium botulinum* A str. Hall  
525897 *Desulfomicrobium baculatum* DSM 4028  
544556 *Geobacillus* sp. Y412MC61  
577650 *Desulfobulbus propionicus* DSM 2032

# 187

355276 *Leptospira borgpetersenii* serovar Hardjo-bovis str. L550  
370438 *Pelotomaculum thermopropionicum* SI  
411489 *Clostridium* sp. L2-50  
451640 *Catenibacterium mitsuokai* DSM 15897  
457570 *Natronaerobius thermophilus* JW/NM-WN-LF  
498761 *Heliobacterium modesticaldum* Ice1  
543302 *Alicyclobacillus acidocaldarius* LAA1  
572544 *Ilyobacter polytropus* DSM 2926  
637381 *Listeria monocytogenes* 08-5923  
697281 *Mahella australiensis* 50-1 BON

# 188

32049 *Synechococcus* sp. PCC 7002  
203119 *Clostridium thermocellum* ATCC 27405  
267410 *Listeria monocytogenes* serotype 4b str. H7858  
411484 *Clostridium* sp. SS2/1

445334 *Clostridium perfringens* C str. JGS1495  
445974 *Clostridium ramosum* DSM 1402  
479437 *Eggerthella lenta* DSM 2243  
521098 *Alicyclobacillus acidocaldarius* subsp. *acidocaldarius* DSM 446  
562970 *Kyrpidia tusciae* DSM 2912  
866499 *Cloacibacillus evryensis* DSM 19522

# 189

32049 *Synechococcus* sp. PCC 7002  
203119 *Clostridium thermocellum* ATCC 27405  
267410 *Listeria monocytogenes* serotype 4b str. H7858  
411484 *Clostridium* sp. SS2/1  
445334 *Clostridium perfringens* C str. JGS1495  
445974 *Clostridium ramosum* DSM 1402  
471223 *Geobacillus* sp. WCH70  
483218 [*Bacteroides*] *pectinophilus* ATCC 43243  
562970 *Kyrpidia tusciae* DSM 2912  
653938 *Listeria monocytogenes* 08-5578

# 190

321332 *Synechococcus* sp. JA-2-3B'a(2-13)  
350688 *Alkaliphilus oremlandii* OhILAs  
355276 *Leptospira borgpetersenii* serovar Hardjo-bovis str. L550  
370438 *Pelotomaculum thermopropionicum* SI  
411489 *Clostridium* sp. L2-50  
451640 *Catenibacterium mitsuokai* DSM 15897  
457570 *Natronaerobius thermophilus* JW/NM-WN-LF  
572544 *Ilyobacter polytropus* DSM 2926  
637381 *Listeria monocytogenes* 08-5923  
697281 *Mahella australiensis* 50-1 BON

# 191

355276 *Leptospira borgpetersenii* serovar Hardjo-bovis str. L550  
370438 *Pelotomaculum thermopropionicum* SI  
411489 *Clostridium* sp. L2-50  
451640 *Catenibacterium mitsuokai* DSM 15897  
451756 *Clostridium perfringens* CPE str. F4969  
498761 *Heliobacterium modesticaldum* Ice1  
543302 *Alicyclobacillus acidocaldarius* LAA1  
572544 *Ilyobacter polytropus* DSM 2926  
637381 *Listeria monocytogenes* 08-5923  
697281 *Mahella australiensis* 50-1 BON

# 192

355276 *Leptospira borgpetersenii* serovar Hardjo-bovis str. L550  
411489 *Clostridium* sp. L2-50  
451640 *Catenibacterium mitsuokai* DSM 15897  
451756 *Clostridium perfringens* CPE str. F4969  
457570 *Natranaerobius thermophilus* JW/NM-WN-LF  
498761 *Heliobacterium modesticaldum* Ice1  
543302 *Alicyclobacillus acidocaldarius* LAA1  
572544 *Ilyobacter polytropus* DSM 2926  
637381 *Listeria monocytogenes* 08-5923  
697281 *Mahella australiensis* 50-1 BON

# 193

882 *Desulfovibrio vulgaris* str. Hildenborough  
96561 *Desulfococcus oleovorans* Hxd3  
240015 *Acidobacterium capsulatum* ATCC 51196  
292459 *Symbiobacterium thermophilum* IAM 14863  
394503 *Clostridium cellulolyticum* H10  
396588 *Thioalkalivibrio sulfidophilus* HL-EbGr7  
439292 *Bacillus selenitireducens* MLS10  
508767 *Clostridium botulinum* E3 str. Alaska E43  
577650 *Desulfobulbus propionicus* DSM 2032  
645991 *Syntrophobotulus glycolicus* DSM 8271

# 194

212717 *Clostridium tetani* E88  
335541 *Syntrophomonas wolfei* subsp. *wolfei* str. Goettingen  
342451 *Staphylococcus saprophyticus* subsp. *saprophyticus* ATCC 15305  
428126 *Clostridium spiroforme* DSM 1552  
445975 *Collinsella stercoris* DSM 13279  
518637 *Eubacterium bifforme* DSM 3989  
546271 *Selenomonas sputigena* ATCC 35185  
584708 *Aminomonas paucivorans* DSM 12260  
748449 *Halobacteroides halobius* DSM 5150  
867903 *Thermaerobacter subterraneus* DSM 13965

# 195

197221 *Thermosynechococcus elongatus* BP-1  
212717 *Clostridium tetani* E88  
264732 *Moorella thermoacetica* ATCC 39073  
333990 *Carnobacterium* sp. AT7  
396513 *Staphylococcus carnosus* subsp. *carnosus* TM300

428126 *Clostridium spiroforme* DSM 1552  
546271 *Selenomonas sputigena* ATCC 35185  
584708 *Aminomonas paucivorans* DSM 12260  
656914 *Desulfonispora thiosulfatigenes* DSM 11270  
867903 *Thermaerobacter subterraneus* DSM 13965

# 196

246194 *Carboxydotherrmus hydrogenoformans* Z-2901  
273068 *Thermoanaerobacter tengcongensis* MB4  
282459 *Staphylococcus aureus* subsp. *aureus* MSSA476  
316278 *Synechococcus* sp. RCC307  
335541 *Syntrophomonas wolfei* subsp. *wolfei* str. Goettingen  
393128 *Listeria monocytogenes* F6900  
445337 *Clostridium botulinum* C str. Eklund  
445975 *Collinsella stercoris* DSM 13279  
518637 *Eubacterium bifforme* DSM 3989  
748449 *Halobacteroides halobius* DSM 5150

# 197

243233 *Methylococcus capsulatus* str. Bath  
314345 *Mariprofundus ferrooxydans* PV-1  
321332 *Synechococcus* sp. JA-2-3B'a(2-13)  
355277 *Leptospira borgpetersenii* serovar Hardjo-bovis str. JB197  
370438 *Pelotomaculum thermopropionicum* SI  
411489 *Clostridium* sp. L2-50  
457570 *Natranaerobius thermophilus* JW/NM-WN-LF  
522772 *Denitrovibrio acetiphilus* DSM 12809  
572544 *Ilyobacter polytropus* DSM 2926  
637381 *Listeria monocytogenes* 08-5923

# 198

96561 *Desulfococcus oleovorans* Hxd3  
177439 *Desulfotalea psychrophila* LSv54  
204773 *Herminiimonas arsenicoxydans*  
207559 *Desulfovibrio alaskensis* G20  
281689 *Desulfuromonas acetoxidans* DSM 684  
290398 *Chromohalobacter salexigens* DSM 3043  
317655 *Sphingopyxis alaskensis* RB2256  
483179 *Brucella canis* ATCC 23365  
557598 *Laribacter hongkongensis* HLHK9  
572477 *Allochromatium vinosum* DSM 180

# 199

1140 *Synechococcus elongatus* PCC 7942  
195102 *Clostridium perfringens* str. 13  
321327 *Synechococcus* sp. JA-3-3Ab  
345219 *Bacillus coagulans* 36D1  
393131 *Listeria monocytogenes* J2818  
428128 *Eubacterium siraeum* DSM 15702  
471855 *Slackia heliotrinireducens* DSM 20476  
500635 *Mitsuokella multacida* DSM 20544  
521460 *Caldicellulosiruptor bescii* DSM 6725  
565034 *Brachyspira hyodysenteriae* WA1

# 200

1140 *Synechococcus elongatus* PCC 7942  
195102 *Clostridium perfringens* str. 13  
321327 *Synechococcus* sp. JA-3-3Ab  
345219 *Bacillus coagulans* 36D1  
393119 *Listeria monocytogenes* FSL J1-208  
428128 *Eubacterium siraeum* DSM 15702  
471855 *Slackia heliotrinireducens* DSM 20476  
500635 *Mitsuokella multacida* DSM 20544  
521460 *Caldicellulosiruptor bescii* DSM 6725  
565034 *Brachyspira hyodysenteriae* WA1

# 201

292415 *Thiobacillus denitrificans* ATCC 25259  
314345 *Mariprofundus ferrooxydans* PV-1  
321332 *Synechococcus* sp. JA-2-3B'a(2-13)  
350688 *Alkaliphilus oremlandii* OhILAs  
355277 *Leptospira borgpetersenii* serovar Hardjo-bovis str. JB197  
370438 *Pelotomaculum thermopropionicum* SI  
393133 *Listeria monocytogenes* 10403S  
444178 *Brucella ovis* ATCC 25840  
457570 *Natronaerobius thermophilus* JW/NM-WN-LF  
572544 *Ilyobacter polytropus* DSM 2926

# 202

32049 *Synechococcus* sp. PCC 7002  
56780 *Syntrophus aciditrophicus* SB  
177439 *Desulfotalea psychrophila* LSv54  
281689 *Desulfuromonas acetoxidans* DSM 684  
391774 *Desulfovibrio vulgaris* DP4  
411484 *Clostridium* sp. SS2/1

445974 *Clostridium ramosum* DSM 1402  
521098 *Alicyclobacillus acidocaldarius* subsp. *acidocaldarius* DSM 446  
572477 *Allochromatium vinosum* DSM 180  
653938 *Listeria monocytogenes* 08-5578

# 203

197221 *Thermosynechococcus elongatus* BP-1  
212717 *Clostridium tetani* E88  
273036 *Staphylococcus aureus* RF122  
335541 *Syntrophomonas wolfei* subsp. *wolfei* str. Goettingen  
445975 *Collinsella stercoris* DSM 13279  
518637 *Eubacterium bifforme* DSM 3989  
546271 *Selenomonas sputigena* ATCC 35185  
584708 *Aminomonas paucivorans* DSM 12260  
748449 *Halobacteroides halobius* DSM 5150  
867903 *Thermaerobacter subterraneus* DSM 13965

# 204

243233 *Methylococcus capsulatus* str. Bath  
321332 *Synechococcus* sp. JA-2-3B'a(2-13)  
355277 *Leptospira borgpetersenii* serovar Hardjo-bovis str. JB197  
411489 *Clostridium* sp. L2-50  
451640 *Catenibacterium mitsuokai* DSM 15897  
457570 *Natranaerobius thermophilus* JW/NM-WN-LF  
522772 *Denitrovibrio acetiphilus* DSM 12809  
572544 *Ilyobacter polytropus* DSM 2926  
637381 *Listeria monocytogenes* 08-5923  
880072 *Desulfobacca acetoxidans* DSM 11109

# 205

355276 *Leptospira borgpetersenii* serovar Hardjo-bovis str. L550  
411474 *Coprococcus eutactus* ATCC 27759  
451640 *Catenibacterium mitsuokai* DSM 15897  
457570 *Natranaerobius thermophilus* JW/NM-WN-LF  
522772 *Denitrovibrio acetiphilus* DSM 12809  
543302 *Alicyclobacillus acidocaldarius* LAA1  
572544 *Ilyobacter polytropus* DSM 2926  
582744 *Methylovorus glucosetrophus* SIP3-4  
637381 *Listeria monocytogenes* 08-5923  
880072 *Desulfobacca acetoxidans* DSM 11109

# 206

197221 *Thermosynechococcus elongatus* BP-1  
273068 *Thermoanaerobacter tengcongensis* MB4  
316278 *Synechococcus* sp. RCC307  
335541 *Syntrophomonas wolfei* subsp. *wolfei* str. Goettingen  
342451 *Staphylococcus saprophyticus* subsp. *saprophyticus* ATCC 15305  
428126 *Clostridium spiroforme* DSM 1552  
445337 *Clostridium botulinum* C str. Eklund  
445975 *Collinsella stercoris* DSM 13279  
518637 *Eubacterium bifforme* DSM 3989  
748449 *Halobacteroides halobius* DSM 5150

# 207

243233 *Methylococcus capsulatus* str. Bath  
314345 *Mariprofundus ferrooxydans* PV-1  
321332 *Synechococcus* sp. JA-2-3B'a(2-13)  
355277 *Leptospira borgpetersenii* serovar Hardjo-bovis str. JB197  
411489 *Clostridium* sp. L2-50  
451640 *Catenibacterium mitsuokai* DSM 15897  
457570 *Natranaerobius thermophilus* JW/NM-WN-LF  
522772 *Denitrovibrio acetiphilus* DSM 12809  
572544 *Ilyobacter polytropus* DSM 2926  
637381 *Listeria monocytogenes* 08-5923

# 208

176280 *Staphylococcus epidermidis* ATCC 12228  
212717 *Clostridium tetani* E88  
316278 *Synechococcus* sp. RCC307  
335541 *Syntrophomonas wolfei* subsp. *wolfei* str. Goettingen  
445975 *Collinsella stercoris* DSM 13279  
518637 *Eubacterium bifforme* DSM 3989  
546271 *Selenomonas sputigena* ATCC 35185  
584708 *Aminomonas paucivorans* DSM 12260  
748449 *Halobacteroides halobius* DSM 5150  
867903 *Thermaerobacter subterraneus* DSM 13965

# 209

321332 *Synechococcus* sp. JA-2-3B'a(2-13)  
350688 *Alkaliphilus oremlandii* OhILAs  
355277 *Leptospira borgpetersenii* serovar Hardjo-bovis str. JB197  
359787 *Staphylococcus aureus* subsp. *aureus* JH1  
393130 *Listeria monocytogenes* J0161  
401526 *Thermosinus carboxydivorans* Nor1  
445973 *Clostridium bartlettii* DSM 16795



451757 *Clostridium perfringens* NCTC 8239  
471855 *Slackia heliotrinireducens* DSM 20476  
515620 *Eubacterium eligens* ATCC 27750

# 210

32049 *Synechococcus* sp. PCC 7002  
56780 *Syntrophus aciditrophicus* SB  
391774 *Desulfovibrio vulgaris* DP4  
411484 *Clostridium* sp. SS2/1  
445334 *Clostridium perfringens* C str. JGS1495  
445974 *Clostridium ramosum* DSM 1402  
521098 *Alicyclobacillus acidocaldarius* subsp. *acidocaldarius* DSM 446  
572477 *Allochromatium vinosum* DSM 180  
653938 *Listeria monocytogenes* 08-5578  
866499 *Cloacibacillus evryensis* DSM 19522

# 211

187272 *Alkalilimnicola ehrlichii* MLHE-1  
292415 *Thiobacillus denitrificans* ATCC 25259  
314345 *Mariprofundus ferrooxydans* PV-1  
321332 *Synechococcus* sp. JA-2-3B'a(2-13)  
355277 *Leptospira borgpetersenii* serovar *Hardjo-bovis* str. JB197  
380394 *Acidithiobacillus ferrooxidans* ATCC 53993  
393116 *Listeria monocytogenes* FSL F2-515  
401526 *Thermosinus carboxydivorans* Nor1  
445973 *Clostridium bartlettii* DSM 16795  
471855 *Slackia heliotrinireducens* DSM 20476

# 212

373903 *Halothermothrix orenii* H 168  
391165 *Granulibacter bethesdensis* CGDNIH1  
393132 *Listeria monocytogenes* L028  
428127 *Eubacterium dolichum* DSM 3991  
445971 *Anaerofustis stercorihominis* DSM 17244  
525146 *Desulfovibrio desulfuricans* subsp. *desulfuricans* str. ATCC 27774  
555778 *Halothiobacillus neapolitanus* c2  
584708 *Aminomonas paucivorans* DSM 12260  
639282 *Deferribacter desulfuricans* SSM1  
867903 *Thermaerobacter subterraneus* DSM 13965

# 213

96561 *Desulfococcus oleovorans* Hxd3

177439 *Desulfotalea psychrophila* Lsv54  
204722 *Brucella suis* 1330  
204773 *Herminiimonas arsenicoxydans*  
207559 *Desulfovibrio alaskensis* G20  
240015 *Acidobacterium capsulatum* ATCC 51196  
292459 *Symbiobacterium thermophilum* IAM 14863  
439292 *Bacillus selenitireducens* MLS10  
483218 [*Bacteroides*] *pectinophilus* ATCC 43243  
645991 *Syntrophobotulus glycolicus* DSM 8271

# 214

1148 *Synechocystis* sp. PCC 6803  
221109 *Oceanobacillus iheyensis* HTE831  
235909 *Geobacillus kaustophilus* HTA426  
267671 *Leptospira interrogans* serovar Copenhageni str. Fiocruz L1-130  
269799 *Geobacter metallireducens* GS-15  
272568 *Gluconacetobacter diazotrophicus* PA1 5  
314278 *Nitrococcus mobilis* Nb-231  
402881 *Parvibaculum lavamentivorans* DS-1  
583346 *Clostridium kluveri* NBRC 12016  
645463 *Clostridium difficile* R20291

# 215

29447 *Xanthomonas albilineans*  
224914 *Brucella melitensis* bv. 1 str. 16M  
314232 *Loktanella vestfoldensis* SKA53  
317655 *Sphingopyxis alaskensis* RB2256  
323098 *Nitrobacter winogradskyi* Nb-255  
394221 *Maricaulis maris* MCS10  
400673 *Legionella pneumophila* str. Corby  
572477 *Allochromatium vinosum* DSM 180  
582402 *Hirschia baltica* ATCC 49814  
595494 *Tolomonas auensis* DSM 9187

# 216

333990 *Carnobacterium* sp. AT7  
373903 *Halothermothrix orenii* H 168  
428127 *Eubacterium dolichum* DSM 3991  
445971 *Anaerofustis stercorihominis* DSM 17244  
525146 *Desulfovibrio desulfuricans* subsp. *desulfuricans* str. ATCC 27774  
555778 *Halothiobacillus neapolitanus* c2  
583345 *Methylotenera mobilis* JLW8  
639282 *Deferribacter desulfuricans* SSM1

667014 *Thermodesulfatator indicus* DSM 15286  
714315 *Leptotrichia goodfellowii* DSM 19756

# 217

323261 *Nitrosococcus oceani* ATCC 19707  
355276 *Leptospira borgpetersenii* serovar Hardjo-bovis str. L550  
411474 *Coprococcus eutactus* ATCC 27759  
444178 *Brucella ovis* ATCC 25840  
451640 *Catenibacterium mitsuokai* DSM 15897  
522772 *Denitrovibrio acetiphilus* DSM 12809  
543302 *Alicyclobacillus acidocaldarius* LAA1  
572544 *Ilyobacter polytropus* DSM 2926  
637381 *Listeria monocytogenes* 08-5923  
880072 *Desulfobacca acetoxidans* DSM 11109

# 218

246194 *Carboxydotherrmus hydrogenoformans* Z-2901  
273068 *Thermoanaerobacter tengcongensis* MB4  
282458 *Staphylococcus aureus* subsp. *aureus* MRSA252  
290633 *Gluconobacter oxydans* 621H  
314276 *Idiomarina baltica* OS145  
445337 *Clostridium botulinum* C str. Eklund  
500635 *Mitsuokella multacida* DSM 20544  
521006 *Neisseria gonorrhoeae* NCCP11945  
521460 *Caldicellulosiruptor bescii* DSM 6725  
565034 *Brachyspira hyodysenteriae* WA1

# 219

32049 *Synechococcus* sp. PCC 7002  
56780 *Syntrophus aciditrophicus* SB  
177439 *Desulfotalea psychrophila* LSv54  
224914 *Brucella melitensis* bv. 1 str. 16M  
281689 *Desulfuromonas acetoxidans* DSM 684  
411464 *Desulfovibrio piger* ATCC 29098  
445974 *Clostridium ramosum* DSM 1402  
483218 [*Bacteroides*] *pectinophilus* ATCC 43243  
557598 *Laribacter hongkongensis* HLHK9  
653938 *Listeria monocytogenes* 08-5578

# 220

323261 *Nitrosococcus oceani* ATCC 19707  
355276 *Leptospira borgpetersenii* serovar Hardjo-bovis str. L550

411474 *Coprococcus eutactus* ATCC 27759  
451640 *Catenibacterium mitsuokai* DSM 15897  
479437 *Eggerthella lenta* DSM 2243  
522772 *Denitrovibrio acetiphilus* DSM 12809  
572544 *Ilyobacter polytropus* DSM 2926  
637381 *Listeria monocytogenes* 08-5923  
866499 *Cloacibacillus evryensis* DSM 19522  
880072 *Desulfobacca acetoxidans* DSM 11109

# 221

391165 *Granulibacter bethesdensis* CGDNIH1  
393132 *Listeria monocytogenes* L028  
428127 *Eubacterium dolichum* DSM 3991  
445971 *Anaerofustis stercorihominis* DSM 17244  
525146 *Desulfovibrio desulfuricans* subsp. *desulfuricans* str. ATCC 27774  
546271 *Selenomonas sputigena* ATCC 35185  
583345 *Methylotenera mobilis* JLW8  
584708 *Aminomonas paucivorans* DSM 12260  
639282 *Deferribacter desulfuricans* SSM1  
867903 *Thermaerobacter subterraneus* DSM 13965

# 222

197221 *Thermosynechococcus elongatus* BP-1  
212717 *Clostridium tetani* E88  
333990 *Carnobacterium* sp. AT7  
349124 *Halorhodospira halophila* SL1  
391165 *Granulibacter bethesdensis* CGDNIH1  
428126 *Clostridium spiroforme* DSM 1552  
546271 *Selenomonas sputigena* ATCC 35185  
584708 *Aminomonas paucivorans* DSM 12260  
717231 *Flexistipes sinusarabici* DSM 4947  
867903 *Thermaerobacter subterraneus* DSM 13965

# 223

189518 *Leptospira interrogans* serovar *Lai* str. 56601  
207954 *Neptuniibacter caesariensis*  
315750 *Bacillus pumilus* SAFR-032  
375286 *Janthinobacterium* sp. Marseille  
392423 *Hydrogenivirga* sp. 128-5-R1-1  
395965 *Methylocella silvestris* BL2  
398767 *Geobacter lovleyi* SZ  
411490 *Anaerostipes caccae* DSM 14662  
447214 *Clostridium butyricum* 5521

526222 *Desulfovibrio salexigens* DSM 2638

# 224

883 *Desulfovibrio vulgaris* str. 'Miyazaki F'  
32049 *Synechococcus* sp. PCC 7002  
96561 *Desulfococcus oleovorans* Hxd3  
177439 *Desulfotalea psychrophila* Lsv54  
445974 *Clostridium ramosum* DSM 1402  
470137 *Brucella suis* ATCC 23445  
471223 *Geobacillus* sp. WCH70  
483218 [*Bacteroides*] *pectinophilus* ATCC 43243  
557598 *Laribacter hongkongensis* HLHK9  
645991 *Syntrophobotulus glycolicus* DSM 8271

# 225

323261 *Nitrosococcus oceani* ATCC 19707  
355276 *Leptospira borgpetersenii* serovar Hardjo-bovis str. L550  
391774 *Desulfovibrio vulgaris* DP4  
411474 *Coprococcus eutactus* ATCC 27759  
451640 *Catenibacterium mitsuokai* DSM 15897  
479437 *Eggerthella lenta* DSM 2243  
522772 *Denitrovibrio acetiphilus* DSM 12809  
543302 *Alicyclobacillus acidocaldarius* LAA1  
653938 *Listeria monocytogenes* 08-5578  
866499 *Cloacibacillus evryensis* DSM 19522

# 226

243233 *Methylococcus capsulatus* str. Bath  
359391 *Brucella melitensis* biovar Abortus 2308  
391774 *Desulfovibrio vulgaris* DP4  
411474 *Coprococcus eutactus* ATCC 27759  
451640 *Catenibacterium mitsuokai* DSM 15897  
479437 *Eggerthella lenta* DSM 2243  
522772 *Denitrovibrio acetiphilus* DSM 12809  
543302 *Alicyclobacillus acidocaldarius* LAA1  
653938 *Listeria monocytogenes* 08-5578  
866499 *Cloacibacillus evryensis* DSM 19522

# 227

323261 *Nitrosococcus oceani* ATCC 19707  
359391 *Brucella melitensis* biovar Abortus 2308  
391774 *Desulfovibrio vulgaris* DP4

411474 *Coprococcus eutactus* ATCC 27759  
451640 *Catenibacterium mitsuokai* DSM 15897  
479437 *Eggerthella lenta* DSM 2243  
522772 *Denitrovibrio acetiphilus* DSM 12809  
543302 *Alicyclobacillus acidocaldarius* LAA1  
653938 *Listeria monocytogenes* 08-5578  
866499 *Cloacibacillus evryensis* DSM 19522

# 228

323261 *Nitrosococcus oceani* ATCC 19707  
355276 *Leptospira borgpetersenii* serovar Hardjo-bovis str. L550  
359391 *Brucella melitensis* biovar Abortus 2308  
411462 *Dorea longicatena* DSM 13814  
451640 *Catenibacterium mitsuokai* DSM 15897  
479437 *Eggerthella lenta* DSM 2243  
522772 *Denitrovibrio acetiphilus* DSM 12809  
637381 *Listeria monocytogenes* 08-5923  
866499 *Cloacibacillus evryensis* DSM 19522  
880072 *Desulfobacca acetoxidans* DSM 11109

# 229

323261 *Nitrosococcus oceani* ATCC 19707  
359391 *Brucella melitensis* biovar Abortus 2308  
411464 *Desulfovibrio piger* ATCC 29098  
411474 *Coprococcus eutactus* ATCC 27759  
451640 *Catenibacterium mitsuokai* DSM 15897  
479437 *Eggerthella lenta* DSM 2243  
498761 *Heliobacterium modesticaldum* Ice1  
543302 *Alicyclobacillus acidocaldarius* LAA1  
653938 *Listeria monocytogenes* 08-5578  
866499 *Cloacibacillus evryensis* DSM 19522

# 230

197221 *Thermosynechococcus elongatus* BP-1  
212717 *Clostridium tetani* E88  
349124 *Halorhodospira halophila* SL1  
391165 *Granulibacter bethesdensis* CGDNIH1  
396513 *Staphylococcus carnosus* subsp. *carnosus* TM300  
428126 *Clostridium spiroforme* DSM 1552  
525146 *Desulfovibrio desulfuricans* subsp. *desulfuricans* str. ATCC 27774  
546271 *Selenomonas sputigena* ATCC 35185  
584708 *Aminomonas paucivorans* DSM 12260  
717231 *Flexistipes sinusarabici* DSM 4947

# 231

323261 *Nitrosococcus oceani* ATCC 19707  
359391 *Brucella melitensis* biovar Abortus 2308  
411464 *Desulfovibrio piger* ATCC 29098  
411474 *Coprococcus eutactus* ATCC 27759  
451640 *Catenibacterium mitsuokai* DSM 15897  
479437 *Eggerthella lenta* DSM 2243  
522772 *Denitrovibrio acetiphilus* DSM 12809  
543302 *Alicyclobacillus acidocaldarius* LAA1  
653938 *Listeria monocytogenes* 08-5578  
866499 *Cloacibacillus evryensis* DSM 19522

# 232

32049 *Synechococcus* sp. PCC 7002  
411464 *Desulfovibrio piger* ATCC 29098  
411484 *Clostridium* sp. SS2/1  
445974 *Clostridium ramosum* DSM 1402  
479437 *Eggerthella lenta* DSM 2243  
521098 *Alicyclobacillus acidocaldarius* subsp. *acidocaldarius* DSM 446  
546272 *Brucella melitensis* ATCC 23457  
572477 *Allochromatium vinosum* DSM 180  
653938 *Listeria monocytogenes* 08-5578  
866499 *Cloacibacillus evryensis* DSM 19522

# 233

1140 *Synechococcus elongatus* PCC 7942  
292415 *Thiobacillus denitrificans* ATCC 25259  
309807 *Salinibacter ruber* DSM 13855  
314345 *Mariprofundus ferrooxydans* PV-1  
393119 *Listeria monocytogenes* FSL J1-208  
401526 *Thermosinus carboxydivorans* Nor1  
445973 *Clostridium bartlettii* DSM 16795  
471855 *Slackia heliotrinireducens* DSM 20476  
525904 *Thermobaculum terrenum* ATCC BAA-798  
693977 *Deinococcus proteolyticus* MRP

# 234

29447 *Xanthomonas albilineans*  
262543 *Exiguobacterium sibiricum* 255-15  
323261 *Nitrosococcus oceani* ATCC 19707  
411464 *Desulfovibrio piger* ATCC 29098

451756 *Clostridium perfringens* CPE str. F4969  
479437 *Eggerthella lenta* DSM 2243  
543302 *Alicyclobacillus acidocaldarius* LAA1  
546272 *Brucella melitensis* ATCC 23457  
653938 *Listeria monocytogenes* 08-5578  
866499 *Cloacibacillus evryensis* DSM 19522

# 235

1148 *Synechocystis* sp. PCC 6803  
189518 *Leptospira interrogans* serovar Lai str. 56601  
207954 *Neptuniibacter caesariensis*  
272568 *Gluconacetobacter diazotrophicus* PA1 5  
314231 *Fulvimarina pelagi* HTCC2506  
375286 *Janthinobacterium* sp. Marseille  
398767 *Geobacter lovleyi* SZ  
413999 *Clostridium botulinum* A str. ATCC 3502  
495036 *Geobacillus* sp. G11MC16  
515619 *Eubacterium rectale* ATCC 33656

# 236

29447 *Xanthomonas albilineans*  
32049 *Synechococcus* sp. PCC 7002  
411464 *Desulfovibrio piger* ATCC 29098  
411484 *Clostridium* sp. SS2/1  
445974 *Clostridium ramosum* DSM 1402  
479437 *Eggerthella lenta* DSM 2243  
521098 *Alicyclobacillus acidocaldarius* subsp. *acidocaldarius* DSM 446  
546272 *Brucella melitensis* ATCC 23457  
653938 *Listeria monocytogenes* 08-5578  
866499 *Cloacibacillus evryensis* DSM 19522

# 237

68909 *Deinococcus geothermalis*  
243233 *Methylococcus capsulatus* str. Bath  
309807 *Salinibacter ruber* DSM 13855  
321332 *Synechococcus* sp. JA-2-3B'a(2-13)  
355277 *Leptospira borgpetersenii* serovar Hardjo-bovis str. JB197  
411489 *Clostridium* sp. L2-50  
522772 *Denitrovibrio acetiphilus* DSM 12809  
525904 *Thermobaculum terrenum* ATCC BAA-798  
572544 *Ilyobacter polytropus* DSM 2926  
637381 *Listeria monocytogenes* 08-5923



# 238

309807 *Salinibacter ruber* DSM 13855  
314345 *Mariprofundus ferrooxydans* PV-1  
321332 *Synechococcus* sp. JA-2-3B'a(2-13)  
355277 *Leptospira borgpetersenii* serovar Hardjo-bovis str. JB197  
380394 *Acidithiobacillus ferrooxidans* ATCC 53993  
393133 *Listeria monocytogenes* 10403S  
445973 *Clostridium bartlettii* DSM 16795  
471855 *Slackia heliotrinireducens* DSM 20476  
525904 *Thermobaculum terrenum* ATCC BAA-798  
693977 *Deinococcus proteolyticus* MRP

# 239

883 *Desulfovibrio vulgaris* str. 'Miyazaki F'  
32049 *Synechococcus* sp. PCC 7002  
96561 *Desulfococcus oleovorans* Hxd3  
177439 *Desulfotalea psychrophila* LSv54  
204773 *Herminiimonas arsenicoxydans*  
207949 *Bermanella marisrubri*  
226185 *Enterococcus faecalis* V583  
483218 [*Bacteroides*] *pectinophilus* ATCC 43243  
568815 *Brucella microti* CCM 4915  
645991 *Syntrophobotulus glycolicus* DSM 8271

# 240

314276 *Idiomarina baltica* OS145  
316278 *Synechococcus* sp. RCC307  
335283 *Nitrosomonas eutropha* C91  
342451 *Staphylococcus saprophyticus* subsp. *saprophyticus* ATCC 15305  
445337 *Clostridium botulinum* C str. Eklund  
445975 *Collinsella stercoris* DSM 13279  
485915 *Desulfohalobium retbaense* DSM 5692  
518637 *Eubacterium bifforme* DSM 3989  
565034 *Brachyspira hyodysenteriae* WA1  
748449 *Halobacteroides halobius* DSM 5150

# 241

68909 *Deinococcus geothermalis*  
243233 *Methylococcus capsulatus* str. Bath  
309807 *Salinibacter ruber* DSM 13855  
321332 *Synechococcus* sp. JA-2-3B'a(2-13)  
355277 *Leptospira borgpetersenii* serovar Hardjo-bovis str. JB197

411489 *Clostridium* sp. L2-50  
451640 *Catenibacterium mitsuokai* DSM 15897  
522772 *Denitrovibrio acetiphilus* DSM 12809  
525904 *Thermobaculum terrenum* ATCC BAA-798  
637381 *Listeria monocytogenes* 08-5923

# 242

292415 *Thiobacillus denitrificans* ATCC 25259  
321332 *Synechococcus* sp. JA-2-3B'a(2-13)  
355277 *Leptospira borgpetersenii* serovar Hardjo-bovis str. JB197  
393116 *Listeria monocytogenes* FSL F2-515  
393595 *Alcanivorax borkumensis* SK2  
444178 *Brucella ovis* ATCC 25840  
445973 *Clostridium bartlettii* DSM 16795  
471855 *Slackia heliotrinireducens* DSM 20476  
515620 *Eubacterium eligens* ATCC 27750  
709032 *Sulfuricurvum kujiense* DSM 16994

# 243

290400 *Jannaschia* sp. CCS1  
314283 *Reinekea blandensis* MED297  
316057 *Rhodopseudomonas palustris* BisB5  
338969 *Rhodoferax ferrireducens* T118  
342109 *Xanthomonas oryzae* pv. *oryzae* MAFF 311018  
351605 *Geobacter uraniireducens* Rf4  
377629 *Teredinibacter turnerae* T7901  
398579 *Shewanella pealeana* ATCC 700345  
411684 *Hoeflea phototrophica* DFL-43  
452662 *Sphingobium japonicum* UT26S

# 244

1140 *Synechococcus elongatus* PCC 7942  
290633 *Gluconobacter oxydans* 621H  
314260 *Parvularcula bermudensis* HTCC2503  
314276 *Idiomarina baltica* OS145  
428128 *Eubacterium siraeum* DSM 15702  
451516 *Staphylococcus aureus* subsp. *aureus* USA300\_TCH1516  
500635 *Mitsuokella multacida* DSM 20544  
521006 *Neisseria gonorrhoeae* NCCP11945  
521460 *Caldicellulosiruptor bescii* DSM 6725  
565034 *Brachyspira hydysenteriae* WA1

# 245

32049 *Synechococcus* sp. PCC 7002  
146919 *Salinibacter ruber*  
243230 *Deinococcus radiodurans* R1  
266117 *Rubrobacter xylanophilus* DSM 9941  
391774 *Desulfovibrio vulgaris* DP4  
411484 *Clostridium* sp. SS2/1  
443906 *Clavibacter michiganensis* subsp. *michiganensis* NCPPB 382  
445974 *Clostridium ramosum* DSM 1402  
572477 *Allochromatium vinosum* DSM 180  
653938 *Listeria monocytogenes* 08-5578

# 246

882 *Desulfovibrio vulgaris* str. Hildenborough  
240015 *Acidobacterium capsulatum* ATCC 51196  
313603 *Maribacter* sp. HTCC2170  
314278 *Nitrococcus mobilis* Nb-231  
446471 *Xylanimonas cellulositica* DSM 15894  
479434 *Sphaerobacter thermophilus* DSM 20745  
544556 *Geobacillus* sp. Y412MC61  
546414 *Deinococcus deserti* VCD115  
577650 *Desulfobulbus propionicus* DSM 2032  
583346 *Clostridium kluveri* NBRC 12016

# 247

31964 *Clavibacter michiganensis* subsp. *sepedonicus*  
32049 *Synechococcus* sp. PCC 7002  
146919 *Salinibacter ruber*  
243230 *Deinococcus radiodurans* R1  
266117 *Rubrobacter xylanophilus* DSM 9941  
391774 *Desulfovibrio vulgaris* DP4  
411484 *Clostridium* sp. SS2/1  
445974 *Clostridium ramosum* DSM 1402  
557598 *Laribacter hongkongensis* HLHK9  
653938 *Listeria monocytogenes* 08-5578

# 248

1140 *Synechococcus elongatus* PCC 7942  
323848 *Nitrosospora multififormis* ATCC 25196  
324925 *Pelodictyon phaeoclathratiforme* BU-1  
380394 *Acidithiobacillus ferrooxidans* ATCC 53993  
393116 *Listeria monocytogenes* FSL F2-515  
401526 *Thermosinus carboxydivorans* Nor1

428128 *Eubacterium siraeum* DSM 15702  
445973 *Clostridium bartlettii* DSM 16795  
471855 *Slackia heliotrinireducens* DSM 20476  
693977 *Deinococcus proteolyticus* MRP

# 249

1148 *Synechocystis* sp. PCC 6803  
189518 *Leptospira interrogans* serovar Lai str. 56601  
207954 *Neptuniibacter caesariensis*  
235909 *Geobacillus kaustophilus* HTA426  
264462 *Bdellovibrio bacteriovorus* HD100  
272568 *Gluconacetobacter diazotrophicus* PA1 5  
375286 *Janthinobacterium* sp. Marseille  
398767 *Geobacter lovleyi* SZ  
413999 *Clostridium botulinum* A str. ATCC 3502  
515619 *Eubacterium rectale* ATCC 33656

# 250

1148 *Synechocystis* sp. PCC 6803  
235909 *Geobacillus kaustophilus* HTA426  
264462 *Bdellovibrio bacteriovorus* HD100  
267671 *Leptospira interrogans* serovar Copenhageni str. Fiocruz L1-130  
272568 *Gluconacetobacter diazotrophicus* PA1 5  
288705 *Renibacterium salmoninarum* ATCC 33209  
398767 *Geobacter lovleyi* SZ  
583346 *Clostridium kluuyveri* NBRC 12016  
645463 *Clostridium difficile* R20291  
649349 *Leadbetterella byssophila* DSM 17132

# 251

882 *Desulfovibrio vulgaris* str. Hildenborough  
313603 *Maribacter* sp. HTCC2170  
314278 *Nitrococcus mobilis* Nb-231  
349163 *Acidiphilium cryptum* JF-5  
394503 *Clostridium cellulolyticum* H10  
446471 *Xylanimonas cellulolytica* DSM 15894  
479434 *Sphaerobacter thermophilus* DSM 20745  
544556 *Geobacillus* sp. Y412MC61  
546414 *Deinococcus deserti* VCD115  
583346 *Clostridium kluuyveri* NBRC 12016

# 252

1140 *Synechococcus elongatus* PCC 7942  
265072 *Methylobacillus flagellatus* KT  
324925 *Pelodictyon phaeoclathratiforme* BU-1  
393116 *Listeria monocytogenes* FSL F2-515  
401526 *Thermosinus carboxydivorans* Nor1  
428128 *Eubacterium siraeum* DSM 15702  
445973 *Clostridium bartlettii* DSM 16795  
471855 *Slackia heliotrinireducens* DSM 20476  
553177 *Capnocytophaga sputigena* ATCC 33612  
693977 *Deinococcus proteolyticus* MRP

# 253

32049 *Synechococcus* sp. PCC 7002  
146919 *Salinibacter ruber*  
243230 *Deinococcus radiodurans* R1  
391774 *Desulfovibrio vulgaris* DP4  
411484 *Clostridium* sp. SS2/1  
443906 *Clavibacter michiganensis* subsp. *michiganensis* NCPPB 382  
445974 *Clostridium ramosum* DSM 1402  
572477 *Allochromatium vinosum* DSM 180  
653938 *Listeria monocytogenes* 08-5578  
866499 *Cloacibacillus evryensis* DSM 19522

# 254

123214 *Persephonella marina* EX-H1  
183190 *Xylella fastidiosa* Temecula1  
190304 *Fusobacterium nucleatum* subsp. *nucleatum* ATCC 25586  
289376 *Thermodesulfovibrio yellowstonii* DSM 11347  
306254 *Campylobacter coli* RM2228  
362948 *Lactobacillus salivarius* UCC118  
416591 *Thermotoga lettingae* TMO  
434271 *Actinobacillus pleuropneumoniae* serovar 3 str. JL03  
561177 *Anaerococcus hydrogenalis* DSM 7454  
591001 *Acidaminococcus fermentans* DSM 20731

# 255

290512 *Prosthecochloris aestuarii* DSM 271  
300852 *Thermus thermophilus* HB8  
373903 *Halothermothrix orenii* H 168  
445971 *Anaerofustis stercorihominis* DSM 17244  
500633 *Clostridium hiranonis* DSM 13275  
525898 *Sulfurospirillum deleyianum* DSM 6946  
553212 *Staphylococcus capitis* SK14

583345 *Methylotenera mobilis* JLW8  
714315 *Leptotrichia goodfellowii* DSM 19756  
880526 *Rikenella microfus* DSM 15922

# 256

32049 *Synechococcus* sp. PCC 7002  
59374 *Fibrobacter succinogenes* subsp. *succinogenes* S85  
146919 *Salinibacter ruber*  
243230 *Deinococcus radiodurans* R1  
391774 *Desulfovibrio vulgaris* DP4  
443906 *Clavibacter michiganensis* subsp. *michiganensis* NCPPB 382  
445974 *Clostridium ramosum* DSM 1402  
572477 *Allochromatium vinosum* DSM 180  
583355 *Coralimargarita akajimensis* DSM 45221  
653938 *Listeria monocytogenes* 08-5578

# 257

273036 *Staphylococcus aureus* RF122  
316278 *Synechococcus* sp. RCC307  
335283 *Nitrosomonas eutropha* C91  
387093 *Sulfurovum* sp. NBC37-1  
391165 *Granulibacter bethesdensis* CGDNIH1  
445975 *Collinsella stercoris* DSM 13279  
485915 *Desulfohalobium retbaense* DSM 5692  
518637 *Eubacterium bifforme* DSM 3989  
546271 *Selenomonas sputigena* ATCC 35185  
584708 *Aminomonas paucivorans* DSM 12260

# 258

228410 *Nitrosomonas europaea* ATCC 19718  
316278 *Synechococcus* sp. RCC307  
387093 *Sulfurovum* sp. NBC37-1  
391165 *Granulibacter bethesdensis* CGDNIH1  
445975 *Collinsella stercoris* DSM 13279  
485915 *Desulfohalobium retbaense* DSM 5692  
518637 *Eubacterium bifforme* DSM 3989  
546271 *Selenomonas sputigena* ATCC 35185  
584708 *Aminomonas paucivorans* DSM 12260  
698737 *Staphylococcus lugdunensis* HKU09-01

# 259

1148 *Synechocystis* sp. PCC 6803

235909 *Geobacillus kaustophilus* HTA426  
264462 *Bdellovibrio bacteriovorus* HD100  
272568 *Gluconacetobacter diazotrophicus* PAL 5  
314278 *Nitrococcus mobilis* Nb-231  
355278 *Leptospira biflexa* serovar Patoc strain 'Patoc 1 (Ames)'  
479434 *Sphaerobacter thermophilus* DSM 20745  
583346 *Clostridium kluuyveri* NBRC 12016  
709991 *Odoribacter splanchnicus* DSM 20712  
710696 *Intrasporangium calvum* DSM 43043

# 260

1148 *Synechocystis* sp. PCC 6803  
189518 *Leptospira interrogans* serovar Lai str. 56601  
235909 *Geobacillus kaustophilus* HTA426  
264462 *Bdellovibrio bacteriovorus* HD100  
272568 *Gluconacetobacter diazotrophicus* PAL 5  
375286 *Janthinobacterium* sp. Marseille  
398767 *Geobacter lovleyi* SZ  
583346 *Clostridium kluuyveri* NBRC 12016  
649349 *Leadbetterella byssophila* DSM 17132  
710696 *Intrasporangium calvum* DSM 43043

# 261

1148 *Synechocystis* sp. PCC 6803  
264462 *Bdellovibrio bacteriovorus* HD100  
340101 *Victivallis vadensis* ATCC BAA-548  
349163 *Acidiphilium cryptum* JF-5  
355278 *Leptospira biflexa* serovar Patoc strain 'Patoc 1 (Ames)'  
446471 *Xylanimonas cellulositytica* DSM 15894  
525897 *Desulfomicrobium baculatum* DSM 4028  
544556 *Geobacillus* sp. Y412MC61  
546414 *Deinococcus deserti* VCD115  
583346 *Clostridium kluuyveri* NBRC 12016

# 262

1148 *Synechocystis* sp. PCC 6803  
264462 *Bdellovibrio bacteriovorus* HD100  
272568 *Gluconacetobacter diazotrophicus* PAL 5  
288705 *Renibacterium salmoninarum* ATCC 33209  
314278 *Nitrococcus mobilis* Nb-231  
355278 *Leptospira biflexa* serovar Patoc strain 'Patoc 1 (Ames)'  
544556 *Geobacillus* sp. Y412MC61  
546414 *Deinococcus deserti* VCD115

583346 *Clostridium kluveri* NBRC 12016  
649349 *Leadbetterella byssophila* DSM 17132

# 263

1148 *Synechocystis* sp. PCC 6803  
264462 *Bdellovibrio bacteriovorus* HD100  
272568 *Gluconacetobacter diazotrophicus* PA1 5  
314278 *Nitrococcus mobilis* Nb-231  
355278 *Leptospira biflexa* serovar Patoc strain 'Patoc 1 (Ames)'  
446471 *Xylanimonas cellulosilytica* DSM 15894  
525897 *Desulfomicrobium baculatum* DSM 4028  
544556 *Geobacillus* sp. Y412MC61  
546414 *Deinococcus deserti* VCD115  
649349 *Leadbetterella byssophila* DSM 17132

# 264

32049 *Synechococcus* sp. PCC 7002  
146919 *Salinibacter ruber*  
243230 *Deinococcus radiodurans* R1  
411464 *Desulfovibrio piger* ATCC 29098  
445974 *Clostridium ramosum* DSM 1402  
446465 *Brachybacterium faecium* DSM 4810  
479437 *Eggerthella lenta* DSM 2243  
572477 *Allochromatium vinosum* DSM 180  
653938 *Listeria monocytogenes* 08-5578  
866499 *Cloacibacillus evryensis* DSM 19522

# 265

1148 *Synechocystis* sp. PCC 6803  
264462 *Bdellovibrio bacteriovorus* HD100  
272568 *Gluconacetobacter diazotrophicus* PA1 5  
313603 *Maribacter* sp. HTCC2170  
314278 *Nitrococcus mobilis* Nb-231  
355278 *Leptospira biflexa* serovar Patoc strain 'Patoc 1 (Ames)'  
446471 *Xylanimonas cellulosilytica* DSM 15894  
525897 *Desulfomicrobium baculatum* DSM 4028  
544556 *Geobacillus* sp. Y412MC61  
546414 *Deinococcus deserti* VCD115

# 266

32049 *Synechococcus* sp. PCC 7002  
59374 *Fibrobacter succinogenes* subsp. *succinogenes* S85



146919 *Salinibacter ruber*  
243230 *Deinococcus radiodurans* R1  
411464 *Desulfovibrio piger* ATCC 29098  
446465 *Brachybacterium faecium* DSM 4810  
479437 *Eggerthella lenta* DSM 2243  
572477 *Allochromatium vinosum* DSM 180  
583355 *Coralimargarita akajimensis* DSM 45221  
866499 *Cloacibacillus evryensis* DSM 19522

# 267

319795 *Deinococcus geothermalis* DSM 11300  
323261 *Nitrosococcus oceani* ATCC 19707  
411464 *Desulfovibrio piger* ATCC 29098  
411474 *Coprococcus eutactus* ATCC 27759  
446465 *Brachybacterium faecium* DSM 4810  
451640 *Catenibacterium mitsuokai* DSM 15897  
479437 *Eggerthella lenta* DSM 2243  
522772 *Denitrovibrio acetiphilus* DSM 12809  
653938 *Listeria monocytogenes* 08-5578  
866499 *Cloacibacillus evryensis* DSM 19522

# 268

32049 *Synechococcus* sp. PCC 7002  
146919 *Salinibacter ruber*  
243230 *Deinococcus radiodurans* R1  
411464 *Desulfovibrio piger* ATCC 29098  
445974 *Clostridium ramosum* DSM 1402  
446465 *Brachybacterium faecium* DSM 4810  
479437 *Eggerthella lenta* DSM 2243  
546272 *Brucella melitensis* ATCC 23457  
653938 *Listeria monocytogenes* 08-5578  
866499 *Cloacibacillus evryensis* DSM 19522

# 269

333990 *Carnobacterium* sp. AT7  
349124 *Halorhodospira halophila* SL1  
378753 *Kocuria rhizophila* DC2201  
428127 *Eubacterium dolichum* DSM 3991  
445971 *Anaerofustis stercorihominis* DSM 17244  
525146 *Desulfovibrio desulfuricans* subsp. *desulfuricans* str. ATCC 27774  
639282 *Deferribacter desulfuricans* SSM1  
670487 *Oceanithermus profundus* DSM 14977  
714315 *Leptotrichia goodfellowii* DSM 19756

880526 *Rikenella microfus* DSM 15922

# 270

190304 *Fusobacterium nucleatum* subsp. *nucleatum* ATCC 25586  
259536 *Psychrobacter arcticus* 273-4  
312153 *Polynucleobacter necessarius* subsp. *asymbiomaticus* QLW-P1DMWA-1  
326298 *Sulfurimonas denitrificans* DSM 1251  
382640 *Bartonella tribocorum* CIP 105476  
405440 *Xylella fastidiosa* M12  
416591 *Thermotoga lettingae* TMO  
429009 *Ammonifex degensii* KC4  
458233 *Macrococcus caseolyticus* JCSC5402  
561177 *Anaerococcus hydrogenalis* DSM 7454

# 271

189518 *Leptospira interrogans* serovar *Lai* str. 56601  
264462 *Bdellovibrio bacteriovorus* HD100  
314231 *Fulvimarina pelagi* HTCC2506  
326427 *Chloroflexus aggregans* DSM 9485  
375286 *Janthinobacterium* sp. Marseille  
411490 *Anaerostipes caccae* DSM 14662  
495036 *Geobacillus* sp. G11MC16  
575540 *Isosphaera pallida* ATCC 43644  
709991 *Odoribacter splanchnicus* DSM 20712  
710696 *Intrasporangium calvum* DSM 43043

# 272

1148 *Synechocystis* sp. PCC 6803  
264462 *Bdellovibrio bacteriovorus* HD100  
272568 *Gluconacetobacter diazotrophicus* PAL 5  
288705 *Renibacterium salmoninarum* ATCC 33209  
314278 *Nitrococcus mobilis* Nb-231  
340101 *Victivallis vadensis* ATCC BAA-548  
355278 *Leptospira biflexa* serovar *Patoc* strain 'Patoc 1 (Ames)'  
544556 *Geobacillus* sp. Y412MC61  
546414 *Deinococcus deserti* VCD115  
649349 *Leadbetterella byssophila* DSM 17132

# 273

1148 *Synechocystis* sp. PCC 6803  
264462 *Bdellovibrio bacteriovorus* HD100  
272568 *Gluconacetobacter diazotrophicus* PAL 5

314278 *Nitrococcus mobilis* Nb-231  
340101 *Victivallis vadensis* ATCC BAA-548  
355278 *Leptospira biflexa* serovar Patoc strain 'Patoc 1 (Ames)'  
446471 *Xylanimonas cellulositytica* DSM 15894  
544556 *Geobacillus* sp. Y412MC61  
546414 *Deinococcus deserti* VCD115  
649349 *Leadbetterella byssophila* DSM 17132

# 274

59374 *Fibrobacter succinogenes* subsp. *succinogenes* S85  
319795 *Deinococcus geothermalis* DSM 11300  
323261 *Nitrosococcus oceani* ATCC 19707  
411464 *Desulfovibrio piger* ATCC 29098  
445974 *Clostridium ramosum* DSM 1402  
446465 *Brachybacterium faecium* DSM 4810  
479437 *Eggerthella lenta* DSM 2243  
583355 *Coralimargarita akajimensis* DSM 45221  
653938 *Listeria monocytogenes* 08-5578  
866499 *Cloacibacillus evryensis* DSM 19522

# 275

59374 *Fibrobacter succinogenes* subsp. *succinogenes* S85  
319795 *Deinococcus geothermalis* DSM 11300  
323261 *Nitrosococcus oceani* ATCC 19707  
411464 *Desulfovibrio piger* ATCC 29098  
411474 *Coprococcus eutactus* ATCC 27759  
446465 *Brachybacterium faecium* DSM 4810  
479437 *Eggerthella lenta* DSM 2243  
583355 *Coralimargarita akajimensis* DSM 45221  
653938 *Listeria monocytogenes* 08-5578  
866499 *Cloacibacillus evryensis* DSM 19522

# 276

1148 *Synechocystis* sp. PCC 6803  
189518 *Leptospira interrogans* serovar Lai str. 56601  
235909 *Geobacillus kaustophilus* HTA426  
264462 *Bdellovibrio bacteriovorus* HD100  
272568 *Gluconacetobacter diazotrophicus* PAL 5  
340101 *Victivallis vadensis* ATCC BAA-548  
375286 *Janthinobacterium* sp. Marseille  
413999 *Clostridium botulinum* A str. ATCC 3502  
709991 *Odoribacter splanchnicus* DSM 20712  
710696 *Intrasporangium calvum* DSM 43043

# 277

1148 *Synechocystis* sp. PCC 6803  
189518 *Leptospira interrogans* serovar Lai str. 56601  
235909 *Geobacillus kaustophilus* HTA426  
264462 *Bdellovibrio bacteriovorus* HD100  
272568 *Gluconacetobacter diazotrophicus* PA1 5  
340101 *Victivallis vadensis* ATCC BAA-548  
375286 *Janthinobacterium* sp. Marseille  
583346 *Clostridium kluveri* NBRC 12016  
649349 *Leadbetterella byssophila* DSM 17132  
710696 *Intrasporangium calvum* DSM 43043

# 278

319795 *Deinococcus geothermalis* DSM 11300  
355276 *Leptospira borgpetersenii* serovar Hardjo-bovis str. L550  
411462 *Dorea longicatena* DSM 13814  
430066 *Brucella abortus* S19  
446465 *Brachybacterium faecium* DSM 4810  
451640 *Catenibacterium mitsuokai* DSM 15897  
509170 *Acinetobacter baumannii* SDF  
522772 *Denitrovibrio acetiphilus* DSM 12809  
637381 *Listeria monocytogenes* 08-5923  
694427 *Paludibacter propionigenes* WB4

# 279

197221 *Thermosynechococcus elongatus* BP-1  
228410 *Nitrosomonas europaea* ATCC 19718  
342451 *Staphylococcus saprophyticus* subsp. *saprophyticus* ATCC 15305  
391165 *Granulibacter bethesdensis* CGDNIH1  
402612 *Flavobacterium psychrophilum* JIP02/86  
428126 *Clostridium spiroforme* DSM 1552  
471856 *Jonesia denitrificans* DSM 20603  
546271 *Selenomonas sputigena* ATCC 35185  
584708 *Aminomonas paucivorans* DSM 12260  
717231 *Flexistipes sinusarabici* DSM 4947

# 280

333990 *Carnobacterium* sp. AT7  
378753 *Kocuria rhizophila* DC2201  
391165 *Granulibacter bethesdensis* CGDNIH1  
428127 *Eubacterium dolichum* DSM 3991

525146 *Desulfovibrio desulfuricans* subsp. *desulfuricans* str. ATCC 27774  
546271 *Selenomonas sputigena* ATCC 35185  
583345 *Methylotenera mobilis* JLW8  
584708 *Aminomonas paucivorans* DSM 12260  
670487 *Oceanithermus profundus* DSM 14977  
880526 *Rikenella microfusus* DSM 15922

# 281

197221 *Thermosynechococcus elongatus* BP-1  
228410 *Nitrosomonas europaea* ATCC 19718  
333990 *Carnobacterium* sp. AT7  
378753 *Kocuria rhizophila* DC2201  
391165 *Granulibacter bethesdensis* CGDNIH1  
402612 *Flavobacterium psychrophilum* JIP02/86  
428126 *Clostridium spiroforme* DSM 1552  
525146 *Desulfovibrio desulfuricans* subsp. *desulfuricans* str. ATCC 27774  
584708 *Aminomonas paucivorans* DSM 12260  
670487 *Oceanithermus profundus* DSM 14977

# 282

189518 *Leptospira interrogans* serovar Lai str. 56601  
207954 *Neptuniibacter caesariensis*  
315750 *Bacillus pumilus* SAFR-032  
392423 *Hydrogenivirga* sp. 128-5-R1-1  
395965 *Methylocella silvestris* BL2  
411490 *Anaerostipes caccae* DSM 14662  
526222 *Desulfovibrio salexigens* DSM 2638  
575540 *Isosphaera pallida* ATCC 43644  
709991 *Odoribacter splanchnicus* DSM 20712  
710696 *Intrasporangium calvum* DSM 43043

# 283

29447 *Xanthomonas albilineans*  
32049 *Synechococcus* sp. PCC 7002  
243230 *Deinococcus radiodurans* R1  
411464 *Desulfovibrio piger* ATCC 29098  
446465 *Brachybacterium faecium* DSM 4810  
479437 *Eggerthella lenta* DSM 2243  
546272 *Brucella melitensis* ATCC 23457  
653938 *Listeria monocytogenes* 08-5578  
694427 *Paludibacter propionisigenes* WB4  
866499 *Cloacibacillus evryensis* DSM 19522

# 284

29447 *Xanthomonas albilineans*  
59374 *Fibrobacter succinogenes* subsp. *succinogenes* S85  
243230 *Deinococcus radiodurans* R1  
411464 *Desulfovibrio piger* ATCC 29098  
446465 *Brachybacterium faecium* DSM 4810  
479437 *Eggerthella lenta* DSM 2243  
546272 *Brucella melitensis* ATCC 23457  
583355 *Coralimargarita akajimensis* DSM 45221  
694427 *Paludibacter propionicigenes* WB4  
866499 *Cloacibacillus evryensis* DSM 19522

# 285

314276 *Idiomarina baltica* OS145  
316278 *Synechococcus* sp. RCC307  
391598 *Flavobacteria bacterium* BAL38  
445975 *Collinsella stercoris* DSM 13279  
451515 *Staphylococcus aureus* subsp. *aureus* USA300\_FPR3757  
478801 *Kytococcus sedentarius* DSM 20547  
485915 *Desulfohalobium retbaense* DSM 5692  
498848 *Thermus aquaticus* Y51MC23  
518637 *Eubacterium bifforme* DSM 3989  
565034 *Brachyspira hyodysenteriae* WA1

# 286

319795 *Deinococcus geothermalis* DSM 11300  
355276 *Leptospira borgpetersenii* serovar *Hardjo-bovis* str. L550  
359391 *Brucella melitensis* biovar *Abortus* 2308  
411462 *Dorea longicatena* DSM 13814  
446465 *Brachybacterium faecium* DSM 4810  
479437 *Eggerthella lenta* DSM 2243  
509170 *Acinetobacter baumannii* SDF  
653938 *Listeria monocytogenes* 08-5578  
694427 *Paludibacter propionicigenes* WB4  
866499 *Cloacibacillus evryensis* DSM 19522

# 287

29447 *Xanthomonas albilineans*  
59374 *Fibrobacter succinogenes* subsp. *succinogenes* S85  
411464 *Desulfovibrio piger* ATCC 29098  
446465 *Brachybacterium faecium* DSM 4810  
479437 *Eggerthella lenta* DSM 2243

546272 *Brucella melitensis* ATCC 23457  
583355 *Coralimargarita akajimensis* DSM 45221  
653938 *Listeria monocytogenes* 08-5578  
694427 *Paludibacter propionicipigenes* WB4  
866499 *Cloacibacillus evryensis* DSM 19522

# 288

197221 *Thermosynechococcus elongatus* BP-1  
333990 *Carnobacterium* sp. AT7  
378753 *Kocuria rhizophila* DC2201  
402612 *Flavobacterium psychrophilum* JIP02/86  
428126 *Clostridium spiroforme* DSM 1552  
481448 *Methylacidiphilum inferorum* V4  
525146 *Desulfovibrio desulfuricans* subsp. *desulfuricans* str. ATCC 27774  
555778 *Halothiobacillus neapolitanus* c2  
584708 *Aminomonas paucivorans* DSM 12260  
670487 *Oceanithermus profundus* DSM 14977

# 289

197221 *Thermosynechococcus elongatus* BP-1  
228410 *Nitrosomonas europaea* ATCC 19718  
333990 *Carnobacterium* sp. AT7  
391165 *Granulibacter bethesdensis* CGDNIH1  
402612 *Flavobacterium psychrophilum* JIP02/86  
428126 *Clostridium spiroforme* DSM 1552  
481448 *Methylacidiphilum inferorum* V4  
546271 *Selenomonas sputigena* ATCC 35185  
584708 *Aminomonas paucivorans* DSM 12260  
670487 *Oceanithermus profundus* DSM 14977

# 290

197221 *Thermosynechococcus elongatus* BP-1  
228410 *Nitrosomonas europaea* ATCC 19718  
273036 *Staphylococcus aureus* RF122  
387093 *Sulfurovum* sp. NBC37-1  
391165 *Granulibacter bethesdensis* CGDNIH1  
402612 *Flavobacterium psychrophilum* JIP02/86  
428126 *Clostridium spiroforme* DSM 1552  
471856 *Jonesia denitrificans* DSM 20603  
584708 *Aminomonas paucivorans* DSM 12260  
670487 *Oceanithermus profundus* DSM 14977

# 291

357808 *Roseiflexus* sp. RS-1  
369723 *Salinispora tropica* CNB-440  
388400 *Bacillus* sp. B14905  
388739 *Roseobacter* sp. SK209-2-6  
395962 *Cyanothece* sp. PCC 8802  
445972 *Anaerotruncus colihominis* DSM 17241  
447217 *Anaeromyxobacter* sp. K  
452637 *Opitutus terrae* PB90-1  
483215 *Bacteroides finegoldii* DSM 17565  
575788 *Vibrio splendidus* LGP32

# 292

273036 *Staphylococcus aureus* RF122  
316278 *Synechococcus* sp. RCC307  
335283 *Nitrosomonas eutropha* C91  
445975 *Collinsella stercoris* DSM 13279  
471856 *Jonesia denitrificans* DSM 20603  
485915 *Desulfohalobium retbaense* DSM 5692  
498848 *Thermus aquaticus* Y51MC23  
518637 *Eubacterium bifforme* DSM 3989  
546271 *Selenomonas sputigena* ATCC 35185  
880074 *Barnesiella viscericola* DSM 18177

# 293

197221 *Thermosynechococcus elongatus* BP-1  
228410 *Nitrosomonas europaea* ATCC 19718  
273036 *Staphylococcus aureus* RF122  
391165 *Granulibacter bethesdensis* CGDNIH1  
402612 *Flavobacterium psychrophilum* JIP02/86  
428126 *Clostridium spiroforme* DSM 1552  
471856 *Jonesia denitrificans* DSM 20603  
481448 *Methylacidiphilum infernorum* V4  
584708 *Aminomonas paucivorans* DSM 12260  
670487 *Oceanithermus profundus* DSM 14977

# 294

32049 *Synechococcus* sp. PCC 7002  
96561 *Desulfococcus oleovorans* Hxd3  
226185 *Enterococcus faecalis* V583  
243230 *Deinococcus radiodurans* R1  
323098 *Nitrobacter winogradskyi* Nb-255  
411461 *Dorea formicigenerans* ATCC 27755



445974 *Clostridium ramosum* DSM 1402  
557598 *Laribacter hongkongensis* HLHK9  
583355 *Coralimargarita akajimensis* DSM 45221  
746697 *Aequorivita sublithicola* DSM 14238

# 295

93059 *Prochlorococcus marinus* str. MIT 9211  
195099 *Campylobacter jejuni* RM1221  
262728 *Haemophilus influenzae* R2866  
307502 *Wolbachia endosymbiont* of *Drosophila ananassae*  
453364 *Streptococcus pneumoniae* CDC0288-04  
479436 *Veillonella parvula* DSM 2008  
525919 *Anaerococcus prevotii* DSM 20548  
572547 *Aminobacterium colombiense* DSM 12261  
700015 *Coriobacterium glomerans* PW2  
747365 *Thermodesulfobium narugense* DSM 14796

# 296

197221 *Thermosynechococcus elongatus* BP-1  
228410 *Nitrosomonas europaea* ATCC 19718  
387093 *Sulfurovum* sp. NBC37-1  
391165 *Granulibacter bethesdensis* CGDNIH1  
471856 *Jonesia denitrificans* DSM 20603  
485915 *Desulfohalobium retbaense* DSM 5692  
518637 *Eubacterium bifforme* DSM 3989  
584708 *Aminomonas paucivorans* DSM 12260  
698737 *Staphylococcus lugdunensis* HKU09-01  
880074 *Barnesiella viscericola* DSM 18177

# 297

31964 *Clavibacter michiganensis* subsp. *sepedonicus*  
32049 *Synechococcus* sp. PCC 7002  
226185 *Enterococcus faecalis* V583  
243230 *Deinococcus radiodurans* R1  
323098 *Nitrobacter winogradskyi* Nb-255  
391597 *Limnobacter* sp. MED105  
411464 *Desulfovibrio piger* ATCC 29098  
537007 *Blautia hansenii* DSM 20583  
583355 *Coralimargarita akajimensis* DSM 45221  
746697 *Aequorivita sublithicola* DSM 14238

# 298

58051 *Moritella* sp. PE36  
204669 *Candidatus Koribacter versatilis* Ellin345  
313624 *Nodularia spumigena* CCY9414  
314271 *Maritimibacter alkaliphilus* HTCC2654  
411467 *Pseudoflavonifractor capillosus* ATCC 29799  
412694 *Bacillus thuringiensis* str. Al Hakam  
526225 *Geodermatophilus obscurus* DSM 43160  
530564 *Pirellula staleyi* DSM 6068  
573370 *Desulfovibrio magneticus* RS-1  
655815 *Zunongwangia profunda* SM-A87

# 299

183190 *Xylella fastidiosa* Temecula1  
190304 *Fusobacterium nucleatum* subsp. *nucleatum* ATCC 25586  
281090 *Leifsonia xyli* subsp. *xyli* str. CTCB07  
311424 *Dehalococcoides* sp. VS  
326298 *Sulfurimonas denitrificans* DSM 1251  
382640 *Bartonella tribocorum* CIP 105476  
416591 *Thermotoga lettingae* TMO  
458233 *Macrococcus caseolyticus* JCSC5402  
561177 *Anaerococcus hydrogenalis* DSM 7454  
865938 *Weeksella virosa* DSM 16922

# 300

273036 *Staphylococcus aureus* RF122  
316278 *Synechococcus* sp. RCC307  
335283 *Nitrosomonas eutropha* C91  
387093 *Sulfurovum* sp. NBC37-1  
391165 *Granulibacter bethesdensis* CGDNIH1  
471856 *Jonesia denitrificans* DSM 20603  
485915 *Desulfohalobium retbaense* DSM 5692  
518637 *Eubacterium bifforme* DSM 3989  
584708 *Aminomonas paucivorans* DSM 12260  
880074 *Barnesiella viscericola* DSM 18177

# 301

228410 *Nitrosomonas europaea* ATCC 19718  
316278 *Synechococcus* sp. RCC307  
387093 *Sulfurovum* sp. NBC37-1  
391165 *Granulibacter bethesdensis* CGDNIH1  
471856 *Jonesia denitrificans* DSM 20603  
485915 *Desulfohalobium retbaense* DSM 5692  
518637 *Eubacterium bifforme* DSM 3989

584708 *Aminomonas paucivorans* DSM 12260  
698737 *Staphylococcus lugdunensis* HKU09-01  
880074 *Barnesiella viscericola* DSM 18177

# 302

316278 *Synechococcus* sp. RCC307  
335283 *Nitrosomonas eutropha* C91  
445975 *Collinsella stercoris* DSM 13279  
471856 *Jonesia denitrificans* DSM 20603  
481448 *Methylacidiphilum inferorum* V4  
485915 *Desulfohalobium retbaense* DSM 5692  
498848 *Thermus aquaticus* Y51MC23  
518637 *Eubacterium bifforme* DSM 3989  
698737 *Staphylococcus lugdunensis* HKU09-01  
880074 *Barnesiella viscericola* DSM 18177

# 303

167879 *Colwellia psychrerythraea* 34H  
177437 *Desulfobacterium autotrophicum* HRM2  
272564 *Desulfitobacterium hafniense* DCB-2  
313624 *Nodularia spumigena* CCY9414  
316056 *Rhodopseudomonas palustris* BisB18  
340100 *Bordetella petrii* DSM 12804  
391037 *Salinispora arenicola* CNS-205  
411467 *Pseudoflavonifractor capillosus* ATCC 29799  
483217 *Bacteroides dorei* DSM 17855  
756272 *Planctomyces brasiliensis* DSM 5305

# 304

177437 *Desulfobacterium autotrophicum* HRM2  
258594 *Rhodopseudomonas palustris* CGA009  
313624 *Nodularia spumigena* CCY9414  
314277 *Marinomonas* sp. MED121  
340100 *Bordetella petrii* DSM 12804  
376686 *Flavobacterium johnsoniae* UW101  
411467 *Pseudoflavonifractor capillosus* ATCC 29799  
412694 *Bacillus thuringiensis* str. Al Hakam  
526225 *Geodermatophilus obscurus* DSM 43160  
756272 *Planctomyces brasiliensis* DSM 5305

# 305

264201 *Candidatus Protochlamydia amoebophila* UWE25

281090 *Leifsonia xyli* subsp. *xyli* str. CTCB07  
311424 *Dehalococcoides* sp. VS  
326298 *Sulfurimonas denitrificans* DSM 1251  
382640 *Bartonella tribocorum* CIP 105476  
405440 *Xylella fastidiosa* M12  
416591 *Thermotoga lettingae* TMO  
458233 *Macrococcus caseolyticus* JCSC5402  
561177 *Anaerococcus hydrogenalis* DSM 7454  
865938 *Weeksella virosa* DSM 16922

# 306

183190 *Xylella fastidiosa* Temecula1  
264201 *Candidatus Protochlamydia amoebophila* UWE25  
281090 *Leifsonia xyli* subsp. *xyli* str. CTCB07  
311424 *Dehalococcoides* sp. VS  
326298 *Sulfurimonas denitrificans* DSM 1251  
382640 *Bartonella tribocorum* CIP 105476  
416591 *Thermotoga lettingae* TMO  
458233 *Macrococcus caseolyticus* JCSC5402  
561177 *Anaerococcus hydrogenalis* DSM 7454  
693978 *Riemerella anatipestifer* ATCC 11845 = DSM 15868

# 307

197221 *Thermosynechococcus elongatus* BP-1  
228410 *Nitrosomonas europaea* ATCC 19718  
342451 *Staphylococcus saprophyticus* subsp. *saprophyticus* ATCC 15305  
387093 *Sulfurovum* sp. NBC37-1  
391165 *Granulibacter bethesdensis* CGDNIH1  
471856 *Jonesia denitrificans* DSM 20603  
481448 *Methylacidiphilum infernorum* V4  
518637 *Eubacterium bifforme* DSM 3989  
584708 *Aminomonas paucivorans* DSM 12260  
880074 *Barnesiella viscericola* DSM 18177

# 308

197221 *Thermosynechococcus elongatus* BP-1  
228410 *Nitrosomonas europaea* ATCC 19718  
273036 *Staphylococcus aureus* RF122  
387093 *Sulfurovum* sp. NBC37-1  
391165 *Granulibacter bethesdensis* CGDNIH1  
471856 *Jonesia denitrificans* DSM 20603  
481448 *Methylacidiphilum infernorum* V4  
518637 *Eubacterium bifforme* DSM 3989

584708 *Aminomonas paucivorans* DSM 12260  
880074 *Barnesiella viscericola* DSM 18177

# 309

190304 *Fusobacterium nucleatum* subsp. *nucleatum* ATCC 25586  
259536 *Psychrobacter arcticus* 273-4  
311424 *Dehalococcoides* sp. VS  
326298 *Sulfurimonas denitrificans* DSM 1251  
351607 *Acidothermus cellulolyticus* 11B  
382640 *Bartonella tribocorum* CIP 105476  
393125 *Listeria monocytogenes* FSL R2-503  
431947 *Porphyromonas gingivalis* ATCC 33277  
521045 *Kosmotoga olearia* TBF 19.5.1  
561177 *Anaerococcus hydrogenalis* DSM 7454

# 310

190304 *Fusobacterium nucleatum* subsp. *nucleatum* ATCC 25586  
259536 *Psychrobacter arcticus* 273-4  
311424 *Dehalococcoides* sp. VS  
326298 *Sulfurimonas denitrificans* DSM 1251  
351607 *Acidothermus cellulolyticus* 11B  
382640 *Bartonella tribocorum* CIP 105476  
431947 *Porphyromonas gingivalis* ATCC 33277  
458233 *Macrococcus caseolyticus* JCSC5402  
521045 *Kosmotoga olearia* TBF 19.5.1  
561177 *Anaerococcus hydrogenalis* DSM 7454

# 311

281090 *Leifsonia xyli* subsp. *xyli* str. CTCB07  
311424 *Dehalococcoides* sp. VS  
326298 *Sulfurimonas denitrificans* DSM 1251  
362948 *Lactobacillus salivarius* UCC118  
382640 *Bartonella tribocorum* CIP 105476  
416591 *Thermotoga lettingae* TMO  
431947 *Porphyromonas gingivalis* ATCC 33277  
557723 *Haemophilus parasuis* SH0165  
561177 *Anaerococcus hydrogenalis* DSM 7454  
591001 *Acidaminococcus fermentans* DSM 20731

# 312

228410 *Nitrosomonas europaea* ATCC 19718  
273036 *Staphylococcus aureus* RF122

316278 *Synechococcus* sp. RCC307  
387093 *Sulfurovum* sp. NBC37-1  
391165 *Granulibacter bethesdensis* CGDNIH1  
471856 *Jonesia denitrificans* DSM 20603  
481448 *Methylacidiphilum inferorum* V4  
518637 *Eubacterium bifforme* DSM 3989  
584708 *Aminomonas paucivorans* DSM 12260  
880074 *Barnesiella viscericola* DSM 18177

# 313

228410 *Nitrosomonas europaea* ATCC 19718  
316278 *Synechococcus* sp. RCC307  
387093 *Sulfurovum* sp. NBC37-1  
391165 *Granulibacter bethesdensis* CGDNIH1  
471856 *Jonesia denitrificans* DSM 20603  
481448 *Methylacidiphilum inferorum* V4  
518637 *Eubacterium bifforme* DSM 3989  
584708 *Aminomonas paucivorans* DSM 12260  
698737 *Staphylococcus lugdunensis* HKU09-01  
880074 *Barnesiella viscericola* DSM 18177

# 314

311424 *Dehalococcoides* sp. VS  
326298 *Sulfurimonas denitrificans* DSM 1251  
349741 *Akkermansia muciniphila* ATCC BAA-835  
351607 *Acidothermus cellulolyticus* 11B  
393125 *Listeria monocytogenes* FSL R2-503  
420336 *Epulopiscium* sp. 'N.t. morphotype B'  
521045 *Kosmotoga olearia* TBF 19.5.1  
537457 *Actinobacillus pleuropneumoniae* serovar 7 str. AP76  
573058 *Peptoniphilus asaccharolyticus* DSM 20463  
865938 *Weeksella virosa* DSM 16922

# 315

333990 *Carnobacterium* sp. AT7  
378753 *Kocuria rhizophila* DC2201  
391165 *Granulibacter bethesdensis* CGDNIH1  
428127 *Eubacterium dolichum* DSM 3991  
525146 *Desulfovibrio desulfuricans* subsp. *desulfuricans* str. ATCC 27774  
583345 *Methylotenera mobilis* JLW8  
584708 *Aminomonas paucivorans* DSM 12260  
670487 *Oceanithermus profundus* DSM 14977  
869211 *Spirochaeta thermophila* DSM 6578

880526 *Rikenella microfus* DSM 15922

# 316

195099 *Campylobacter jejuni* RM1221  
262728 *Haemophilus influenzae* R2866  
264199 *Streptococcus thermophilus* LMG 18311  
403833 *Petrotoga mobilis* SJ95  
456827 *Candidatus Cloacamonas acidaminovorans*  
518635 *Bifidobacterium angulatum* DSM 20098 = JCM 7096  
525919 *Anaerococcus prevotii* DSM 20548  
608538 *Hydrogenobacter thermophilus* TK-6  
622759 *Zymomonas mobilis* subsp. *mobilis* NCIMB 11163  
747365 *Thermodesulfobium narugense* DSM 14796

# 317

264201 *Candidatus Protochlamydia amoebophila* UWE25  
281090 *Leifsonia xyli* subsp. *xyli* str. CTCB07  
311424 *Dehalococcoides* sp. VS  
326298 *Sulfurimonas denitrificans* DSM 1251  
362948 *Lactobacillus salivarius* UCC118  
382640 *Bartonella tribocorum* CIP 105476  
416591 *Thermotoga lettingae* TMO  
431947 *Porphyromonas gingivalis* ATCC 33277  
557723 *Haemophilus parasuis* SH0165  
561177 *Anaerococcus hydrogenalis* DSM 7454

# 318

228410 *Nitrosomonas europaea* ATCC 19718  
333990 *Carnobacterium* sp. AT7  
378753 *Kocuria rhizophila* DC2201  
391165 *Granulibacter bethesdensis* CGDNIH1  
402612 *Flavobacterium psychrophilum* JIP02/86  
428127 *Eubacterium dolichum* DSM 3991  
525146 *Desulfovibrio desulfuricans* subsp. *desulfuricans* str. ATCC 27774  
584708 *Aminomonas paucivorans* DSM 12260  
670487 *Oceanithermus profundus* DSM 14977  
869211 *Spirochaeta thermophila* DSM 6578

# 319

259536 *Psychrobacter arcticus* 273-4  
311424 *Dehalococcoides* sp. VS  
326298 *Sulfurimonas denitrificans* DSM 1251

349741 Akkermansia muciniphila ATCC BAA-835  
351607 Acidothermus cellulolyticus 11B  
382640 Bartonella tribocorum CIP 105476  
393125 Listeria monocytogenes FSL R2-503  
431947 Porphyromonas gingivalis ATCC 33277  
521045 Kosmotoga olearia TBF 19.5.1  
573058 Peptoniphilus asaccharolyticus DSM 20463

# 320

259536 Psychrobacter arcticus 273-4  
311424 Dehalococcoides sp. VS  
326298 Sulfurimonas denitrificans DSM 1251  
349741 Akkermansia muciniphila ATCC BAA-835  
351607 Acidothermus cellulolyticus 11B  
382640 Bartonella tribocorum CIP 105476  
393125 Listeria monocytogenes FSL R2-503  
431947 Porphyromonas gingivalis ATCC 33277  
521045 Kosmotoga olearia TBF 19.5.1  
561177 Anaerococcus hydrogenalis DSM 7454

# 321

311424 Dehalococcoides sp. VS  
326298 Sulfurimonas denitrificans DSM 1251  
349741 Akkermansia muciniphila ATCC BAA-835  
351607 Acidothermus cellulolyticus 11B  
382640 Bartonella tribocorum CIP 105476  
393125 Listeria monocytogenes FSL R2-503  
431947 Porphyromonas gingivalis ATCC 33277  
521045 Kosmotoga olearia TBF 19.5.1  
537457 Actinobacillus pleuropneumoniae serovar 7 str. AP76  
573058 Peptoniphilus asaccharolyticus DSM 20463

# 322

259536 Psychrobacter arcticus 273-4  
311424 Dehalococcoides sp. VS  
326298 Sulfurimonas denitrificans DSM 1251  
349741 Akkermansia muciniphila ATCC BAA-835  
351607 Acidothermus cellulolyticus 11B  
382640 Bartonella tribocorum CIP 105476  
431947 Porphyromonas gingivalis ATCC 33277  
458233 Macrococcus caseolyticus JCSC5402  
521045 Kosmotoga olearia TBF 19.5.1  
561177 Anaerococcus hydrogenalis DSM 7454



# 323

299768 *Streptococcus thermophilus* CNRZ1066  
306264 *Campylobacter upsaliensis* RM3195  
334380 *Orientia tsutsugamushi* str. Ikeda  
340177 *Chlorobium chlorochromatii* CaD3  
351581 *Francisella tularensis* subsp. holarctica FSC200  
484019 *Thermosipho africanus* TCF52B  
525909 *Acidimicrobium ferrooxidans* DSM 10331  
566552 *Bifidobacterium catenulatum* DSM 16992 = JCM 1194  
580340 *Thermovirga lienii* DSM 17291  
693978 *Riemerella anatipestifer* ATCC 11845 = DSM 15868

# 324

195099 *Campylobacter jejuni* RM1221  
262728 *Haemophilus influenzae* R2866  
307502 *Wolbachia endosymbiont* of *Drosophila ananassae*  
314315 *Lactobacillus sakei* subsp. sakei 23K  
391009 *Thermosipho melanesiensis* BI429  
456827 *Candidatus Cloacamonas acidaminovorans*  
518635 *Bifidobacterium angulatum* DSM 20098 = JCM 7096  
525919 *Anaerococcus prevotii* DSM 20548  
700015 *Coriobacterium glomerans* PW2  
747365 *Thermodesulfobium narugense* DSM 14796

# 325

190304 *Fusobacterium nucleatum* subsp. nucleatum ATCC 25586  
311424 *Dehalococcoides* sp. VS  
326298 *Sulfurimonas denitrificans* DSM 1251  
375432 *Haemophilus influenzae* R3021  
382640 *Bartonella tribocorum* CIP 105476  
401473 *Bifidobacterium dentium* Bd1  
431947 *Porphyromonas gingivalis* ATCC 33277  
467705 *Streptococcus gordonii* str. Challis substr. CH1  
521045 *Kosmotoga olearia* TBF 19.5.1  
561177 *Anaerococcus hydrogenalis* DSM 7454

# 326

195099 *Campylobacter jejuni* RM1221  
242619 *Porphyromonas gingivalis* W83  
262728 *Haemophilus influenzae* R2866  
264199 *Streptococcus thermophilus* LMG 18311

403833 *Petrotoga mobilis* SJ95  
479436 *Veillonella parvula* DSM 2008  
518635 *Bifidobacterium angulatum* DSM 20098 = JCM 7096  
608538 *Hydrogenobacter thermophilus* TK-6  
622759 *Zymomonas mobilis* subsp. *mobilis* NCIMB 11163  
747365 *Thermodesulfobium narugense* DSM 14796

# 327

190304 *Fusobacterium nucleatum* subsp. *nucleatum* ATCC 25586  
205913 *Bifidobacterium longum* DJ010A  
272843 *Pasteurella multocida* subsp. *multocida* str. Pm70  
306254 *Campylobacter coli* RM2228  
334380 *Orientia tsutsugamushi* str. Ikeda  
340177 *Chlorobium chlorochromatii* CaD3  
416591 *Thermotoga lettingae* TMO  
561276 *Streptococcus pneumoniae* ATCC 700669  
591001 *Acidaminococcus fermentans* DSM 20731  
693978 *Riemerella anatipestifer* ATCC 11845 = DSM 15868

# 328

190304 *Fusobacterium nucleatum* subsp. *nucleatum* ATCC 25586  
311424 *Dehalococcoides* sp. VS  
326298 *Sulfurimonas denitrificans* DSM 1251  
375432 *Haemophilus influenzae* R3021  
382640 *Bartonella tribocorum* CIP 105476  
401473 *Bifidobacterium dentium* Bd1  
416591 *Thermotoga lettingae* TMO  
431947 *Porphyromonas gingivalis* ATCC 33277  
467705 *Streptococcus gordonii* str. Challis substr. CH1  
561177 *Anaerococcus hydrogenalis* DSM 7454

# 329

205913 *Bifidobacterium longum* DJ010A  
306254 *Campylobacter coli* RM2228  
334380 *Orientia tsutsugamushi* str. Ikeda  
340177 *Chlorobium chlorochromatii* CaD3  
351581 *Francisella tularensis* subsp. *holarctica* FSC200  
484019 *Thermosipho africanus* TCF52B  
525909 *Acidimicrobium ferrooxidans* DSM 10331  
561276 *Streptococcus pneumoniae* ATCC 700669  
591001 *Acidaminococcus fermentans* DSM 20731  
693978 *Riemerella anatipestifer* ATCC 11845 = DSM 15868

# 330

242619 Porphyromonas gingivalis W83  
299768 Streptococcus thermophilus CNRZ1066  
306264 Campylobacter upsaliensis RM3195  
309799 Dictyoglomus thermophilum H-6-12  
334380 Orientia tsutsugamushi str. Ikeda  
374932 Haemophilus influenzae PittHH  
403833 Petrotoga mobilis SJ95  
525909 Acidimicrobium ferrooxidans DSM 10331  
566552 Bifidobacterium catenulatum DSM 16992 = JCM 1194  
608538 Hydrogenobacter thermophilus TK-6

# 331

262728 Haemophilus influenzae R2866  
307502 Wolbachia endosymbiont of Drosophila ananassae  
360111 Campylobacter jejuni subsp. jejuni CF93-6  
390874 Thermotoga petrophila RKU-1  
398513 Bifidobacterium bifidum NCIMB 41171  
453364 Streptococcus pneumoniae CDC0288-04  
456827 Candidatus Cloacamonas acidaminovorans  
525919 Anaerococcus prevotii DSM 20548  
634504 Bartonella grahamii as4aup  
700015 Coriobacterium glomerans PW2

# 332

316278 Synechococcus sp. RCC307  
335283 Nitrosomonas eutropha C91  
445975 Collinsella stercoris DSM 13279  
471856 Jonesia denitrificans DSM 20603  
485915 Desulfohalobium retbaense DSM 5692  
498848 Thermus aquaticus Y51MC23  
518637 Eubacterium bifforme DSM 3989  
698737 Staphylococcus lugdunensis HKU09-01  
880074 Barnesiella viscericola DSM 18177  
906968 Treponema brennaboreense DSM 12168

# 333

316278 Synechococcus sp. RCC307  
335283 Nitrosomonas eutropha C91  
445975 Collinsella stercoris DSM 13279  
471856 Jonesia denitrificans DSM 20603  
481448 Methylacidiphilum inferorum V4

485915 *Desulfohalobium retbaense* DSM 5692  
518637 *Eubacterium bifforme* DSM 3989  
698737 *Staphylococcus lugdunensis* HKU09-01  
880074 *Barnesiella viscericola* DSM 18177  
906968 *Treponema brennaboreense* DSM 12168

# 334

259536 *Psychrobacter arcticus* 273-4  
311424 *Dehalococcoides* sp. VS  
326298 *Sulfurimonas denitrificans* DSM 1251  
349741 *Akkermansia muciniphila* ATCC BAA-835  
382640 *Bartonella tribocorum* CIP 105476  
401473 *Bifidobacterium dentium* Bd1  
431947 *Porphyromonas gingivalis* ATCC 33277  
467705 *Streptococcus gordonii* str. Challis substr. CH1  
521045 *Kosmotoga olearia* TBF 19.5.1  
561177 *Anaerococcus hydrogenalis* DSM 7454

# 335

242619 *Porphyromonas gingivalis* W83  
299768 *Streptococcus thermophilus* CNRZ1066  
306264 *Campylobacter upsaliensis* RM3195  
334380 *Orientia tsutsugamushi* str. Ikeda  
403833 *Petrotoga mobilis* SJ95  
484022 *Francisella philomiragia* subsp. *philomiragia* ATCC 25017  
566552 *Bifidobacterium catenulatum* DSM 16992 = JCM 1194  
572547 *Aminobacterium colombiense* DSM 12261  
608538 *Hydrogenobacter thermophilus* TK-6  
622759 *Zymomonas mobilis* subsp. *mobilis* NCIMB 11163

# 336

311424 *Dehalococcoides* sp. VS  
326298 *Sulfurimonas denitrificans* DSM 1251  
349741 *Akkermansia muciniphila* ATCC BAA-835  
375432 *Haemophilus influenzae* R3021  
382640 *Bartonella tribocorum* CIP 105476  
401473 *Bifidobacterium dentium* Bd1  
431947 *Porphyromonas gingivalis* ATCC 33277  
467705 *Streptococcus gordonii* str. Challis substr. CH1  
521045 *Kosmotoga olearia* TBF 19.5.1  
561177 *Anaerococcus hydrogenalis* DSM 7454

# 337

262724 *Thermus thermophilus* HB27  
349741 *Akkermansia muciniphila* ATCC BAA-835  
351607 *Acidothermus cellulolyticus* 11B  
393125 *Listeria monocytogenes* FSL R2-503  
498738 *Borrelia burgdorferi* 29805  
521045 *Kosmotoga olearia* TBF 19.5.1  
537457 *Actinobacillus pleuropneumoniae* serovar 7 str. AP76  
563040 *Sulfurimonas autotrophica* DSM 16294  
573058 *Peptoniphilus asaccharolyticus* DSM 20463  
865938 *Weeksella virosa* DSM 16922

# 338

206672 *Bifidobacterium longum* NCC2705  
381764 *Fervidobacterium nodosum* Rt17-B1  
453361 *Streptococcus pneumoniae* CDC1087-00  
515635 *Dictyoglomus turgidum* DSM 6724  
521003 *Collinsella intestinalis* DSM 13280  
525903 *Thermanaerovibrio acidaminovorans* DSM 6589  
544406 *Helicobacter pylori* B128  
545422 *Francisella novicida* FTE  
634504 *Bartonella grahamii* as4aup  
879243 *Porphyromonas asaccharolytica* DSM 20707

# 339

242619 *Porphyromonas gingivalis* W83  
299768 *Streptococcus thermophilus* CNRZ1066  
306264 *Campylobacter upsaliensis* RM3195  
334380 *Orientia tsutsugamushi* str. Ikeda  
374932 *Haemophilus influenzae* PittHH  
403833 *Petrotoga mobilis* SJ95  
525909 *Acidimicrobium ferrooxidans* DSM 10331  
566552 *Bifidobacterium catenulatum* DSM 16992 = JCM 1194  
608538 *Hydrogenobacter thermophilus* TK-6  
622759 *Zymomonas mobilis* subsp. *mobilis* NCIMB 11163

# 340

85962 *Helicobacter pylori* 26695  
192222 *Campylobacter jejuni* subsp. *jejuni* NCTC 11168 = ATCC 700819  
243164 *Dehalococcoides ethenogenes* 195  
367928 *Bifidobacterium adolescentis* ATCC 15703  
374930 *Haemophilus influenzae* PittEE  
380749 *Hydrogenobaculum* sp. Y04AAS1

393115 *Francisella tularensis* subsp. *tularensis* FSC198  
405566 *Lactobacillus helveticus* DPC 4571  
561304 *Mycobacterium leprae* Br4923  
868864 *Desulfurobacterium thermolithotrophum* DSM 11699

# 341

306264 *Campylobacter upsaliensis* RM3195  
334380 *Orientia tsutsugamushi* str. Ikeda  
340177 *Chlorobium chlorochromatii* CaD3  
351581 *Francisella tularensis* subsp. *holarctica* FSC200  
365659 *Streptococcus mitis* B6  
374932 *Haemophilus influenzae* PittHH  
484019 *Thermosiphon africanus* TCF52B  
525909 *Acidimicrobium ferrooxidans* DSM 10331  
566552 *Bifidobacterium catenulatum* DSM 16992 = JCM 1194  
693978 *Riemerella anatipestifer* ATCC 11845 = DSM 15868

# 342

59196 *Rickettsiella grylli*  
294934 *Streptococcus pyogenes* M49 591  
314261 *Candidatus Pelagibacter ubique* HTCC1002  
441768 *Acholeplasma laidlawii* PG-8A  
441952 *Francisella tularensis* subsp. *mediasiatica* FSC147  
452659 *Rickettsia rickettsii* str. Iowa  
521095 *Atopobium parvulum* DSM 20469  
569881 *Wolbachia endosymbiont* of *Culex quinquefasciatus* JHB  
633145 *Dehalococcoides* sp. GT  
679897 *Helicobacter mustelae* 12198

# 343

205914 *Haemophilus somnus* 129PT  
218495 *Streptococcus uberis* 0140J  
307502 *Wolbachia endosymbiont* of *Drosophila ananassae*  
360111 *Campylobacter jejuni* subsp. *jejuni* CF93-6  
381764 *Fervidobacterium nodosum* Rt17-B1  
525903 *Thermanaerovibrio acidaminovorans* DSM 6589  
525919 *Anaerococcus prevotii* DSM 20548  
634504 *Bartonella grahamii* as4aup  
700015 *Coriobacterium glomerans* PW2  
879243 *Porphyromonas asaccharolytica* DSM 20707

# 344

119857 *Francisella tularensis* subsp. *holarctica*  
218495 *Streptococcus uberis* 0140J  
307502 *Wolbachia endosymbiont* of *Drosophila ananassae*  
360111 *Campylobacter jejuni* subsp. *jejuni* CF93-6  
381764 *Fervidobacterium nodosum* Rt17-B1  
525903 *Thermanaerovibrio acidaminovorans* DSM 6589  
525919 *Anaerococcus prevotii* DSM 20548  
634504 *Bartonella grahamii* as4aup  
700015 *Coriobacterium glomerans* PW2  
879243 *Porphyromonas asaccharolytica* DSM 20707

# 345

71421 *Haemophilus influenzae* Rd KW20  
192222 *Campylobacter jejuni* subsp. *jejuni* NCTC 11168 = ATCC 700819  
367928 *Bifidobacterium adolescentis* ATCC 15703  
380749 *Hydrogenobaculum* sp. Y04AAS1  
382638 *Helicobacter acinonychis* str. Sheeba  
393115 *Francisella tularensis* subsp. *tularensis* FSC198  
405566 *Lactobacillus helveticus* DPC 4571  
411465 *Parvimonas micra* ATCC 33270  
561304 *Mycobacterium leprae* Br4923  
868864 *Desulfurobacterium thermolithotrophum* DSM 11699

# 346

167539 *Prochlorococcus marinus* subsp. *marinus* str. CCMP1375  
306264 *Campylobacter upsaliensis* RM3195  
334380 *Orientia tsutsugamushi* str. Ikeda  
340177 *Chlorobium chlorochromatii* CaD3  
351581 *Francisella tularensis* subsp. *holarctica* FSC200  
365659 *Streptococcus mitis* B6  
484019 *Thermosipho africanus* TCF52B  
525909 *Acidimicrobium ferrooxidans* DSM 10331  
566552 *Bifidobacterium catenulatum* DSM 16992 = JCM 1194  
693978 *Riemerella anatipestifer* ATCC 11845 = DSM 15868

# 347

262724 *Thermus thermophilus* HB27  
349741 *Akkermansia muciniphila* ATCC BAA-835  
351607 *Acidothermus cellulolyticus* 11B  
420336 *Epulopiscium* sp. 'N.t. morphotype B'  
456298 *Haemophilus parasuis* 29755  
498738 *Borrelia burgdorferi* 29805  
521097 *Capnocytophaga ochracea* DSM 7271

523794 *Leptotrichia buccalis* C-1013-b  
563040 *Sulfurimonas autotrophica* DSM 16294  
637909 *Streptococcus gallolyticus* UCN34

# 348

228399 *Actinobacillus pleuropneumoniae* serovar 1 str. 4074  
262724 *Thermus thermophilus* HB27  
349741 *Akkermansia muciniphila* ATCC BAA-835  
420336 *Epulopiscium* sp. 'N.t. morphotype B'  
498738 *Borrelia burgdorferi* 29805  
521097 *Capnocytophaga ochracea* DSM 7271  
523794 *Leptotrichia buccalis* C-1013-b  
553199 *Propionibacterium acnes* SK137  
563040 *Sulfurimonas autotrophica* DSM 16294  
637909 *Streptococcus gallolyticus* UCN34

# 349

205914 *Haemophilus somnus* 129PT  
206672 *Bifidobacterium longum* NCC2705  
307502 *Wolbachia endosymbiont* of *Drosophila ananassae*  
381764 *Fervidobacterium nodosum* Rt17-B1  
453361 *Streptococcus pneumoniae* CDC1087-00  
525903 *Thermanaerovibrio acidaminovorans* DSM 6589  
525919 *Anaerococcus prevotii* DSM 20548  
544406 *Helicobacter pylori* B128  
700015 *Coriobacterium glomerans* PW2  
879243 *Porphyromonas asaccharolytica* DSM 20707

# 350

59920 *Prochlorococcus marinus* str. NATL2A  
262724 *Thermus thermophilus* HB27  
342613 *Streptococcus agalactiae* 18RS21  
420336 *Epulopiscium* sp. 'N.t. morphotype B'  
518634 *Bifidobacterium breve* DSM 20213 = JCM 1192  
523794 *Leptotrichia buccalis* C-1013-b  
553199 *Propionibacterium acnes* SK137  
563040 *Sulfurimonas autotrophica* DSM 16294  
634176 *Aggregatibacter aphrophilus* NJ8700  
868129 *Prevotella bivia* DSM 20514

# 351

259536 *Psychrobacter arcticus* 273-4



311424 *Dehalococcoides* sp. VS  
326298 *Sulfurimonas denitrificans* DSM 1251  
349741 *Akkermansia muciniphila* ATCC BAA-835  
351607 *Acidothermus cellulolyticus* 11B  
382640 *Bartonella tribocorum* CIP 105476  
393125 *Listeria monocytogenes* FSL R2-503  
431947 *Porphyromonas gingivalis* ATCC 33277  
498738 *Borrelia burgdorferi* 29805  
573058 *Peptoniphilus asaccharolyticus* DSM 20463

# 352

206672 *Bifidobacterium longum* NCC2705  
281310 *Haemophilus influenzae* 86-028NP  
307502 *Wolbachia endosymbiont of Drosophila ananassae*  
381764 *Fervidobacterium nodosum* Rt17-B1  
453361 *Streptococcus pneumoniae* CDC1087-00  
521003 *Collinsella intestinalis* DSM 13280  
525903 *Thermanaerovibrio acidaminovorans* DSM 6589  
544406 *Helicobacter pylori* B128  
634504 *Bartonella grahamii* as4aup  
879243 *Porphyromonas asaccharolytica* DSM 20707

# 353

205914 *Haemophilus somnus* 129PT  
206672 *Bifidobacterium longum* NCC2705  
307502 *Wolbachia endosymbiont of Drosophila ananassae*  
381764 *Fervidobacterium nodosum* Rt17-B1  
453361 *Streptococcus pneumoniae* CDC1087-00  
525903 *Thermanaerovibrio acidaminovorans* DSM 6589  
544406 *Helicobacter pylori* B128  
634504 *Bartonella grahamii* as4aup  
700015 *Coriobacterium glomerans* PW2  
879243 *Porphyromonas asaccharolytica* DSM 20707

# 354

259536 *Psychrobacter arcticus* 273-4  
311424 *Dehalococcoides* sp. VS  
326298 *Sulfurimonas denitrificans* DSM 1251  
349741 *Akkermansia muciniphila* ATCC BAA-835  
351607 *Acidothermus cellulolyticus* 11B  
382640 *Bartonella tribocorum* CIP 105476  
431947 *Porphyromonas gingivalis* ATCC 33277  
458233 *Macrococcus caseolyticus* JCSC5402

498738 *Borrelia burgdorferi* 29805  
561177 *Anaerococcus hydrogenalis* DSM 7454

# 355

167555 *Prochlorococcus marinus* str. NATL1A  
257309 *Corynebacterium diphtheriae* NCTC 13129  
262724 *Thermus thermophilus* HB27  
342614 *Streptococcus agalactiae* 515  
420336 *Epulopiscium* sp. 'N.t. morphotype B'  
523794 *Leptotrichia buccalis* C-1013-b  
553199 *Propionibacterium acnes* SK137  
563040 *Sulfurimonas autotrophica* DSM 16294  
634176 *Aggregatibacter aphrophilus* NJ8700  
868129 *Prevotella bivia* DSM 20514

# 356

243161 *Chlamydia muridarum* Nigg  
254945 *Ehrlichia ruminantium* str. Welgevonden  
269484 *Ehrlichia canis* str. Jake  
272561 *Chlamydia trachomatis* D/UW-3/CX  
315277 *Chlamydia trachomatis* A/HAR-13  
434131 *Neorickettsia risticii* str. Illinois  
436113 *Mycoplasma mycoides* subsp. capri str. GM12  
574556 *Anaplasma centrale* str. Israel  
580049 *Chlamydia trachomatis* B/Jali20/OT  
672161 *Chlamydia trachomatis* B/TZ1A828/OT

# 357

205913 *Bifidobacterium longum* DJ010A  
264201 *Candidatus Protochlamydia amoebophila* UWE25  
360104 *Campylobacter concisus* 13826  
416269 *Actinobacillus pleuropneumoniae* serovar 5b str. L20  
416591 *Thermotoga lettingae* TMO  
498736 *Borrelia burgdorferi* 80a  
561177 *Anaerococcus hydrogenalis* DSM 7454  
561276 *Streptococcus pneumoniae* ATCC 700669  
591001 *Acidaminococcus fermentans* DSM 20731  
693978 *Riemerella anatipestifer* ATCC 11845 = DSM 15868

# 358

167539 *Prochlorococcus marinus* subsp. *marinus* str. CCMP1375  
306264 *Campylobacter upsaliensis* RM3195

334380 *Orientia tsutsugamushi* str. Ikeda  
340177 *Chlorobium chlorochromatii* CaD3  
351581 *Francisella tularensis* subsp. *holarctica* FSC200  
365659 *Streptococcus mitis* B6  
484019 *Thermosiphon africanus* TCF52B  
566552 *Bifidobacterium catenulatum* DSM 16992 = JCM 1194  
645127 *Corynebacterium kroppenstedtii* DSM 44385  
693978 *Riemerella anatipestifer* ATCC 11845 = DSM 15868

# 359

262724 *Thermus thermophilus* HB27  
267747 *Propionibacterium acnes* KPA171202  
367737 *Arcobacter butzleri* RM4018  
445983 *Borrelia burgdorferi* 156a  
500633 *Clostridium hiranonis* DSM 13275  
518634 *Bifidobacterium breve* DSM 20213 = JCM 1192  
523794 *Leptotrichia buccalis* C-1013-b  
634176 *Aggregatibacter aphrophilus* NJ8700  
637909 *Streptococcus gallolyticus* UCN34  
867902 *Ornithobacterium rhinotracheale* DSM 15997

# 360

95663 *Ureaplasma urealyticum* serovar 9  
243164 *Dehalococcoides ethenogenes* 195  
306263 *Campylobacter lari* RM2100  
390333 *Lactobacillus delbrueckii* subsp. *bulgaricus* ATCC 11842  
393011 *Francisella tularensis* subsp. *holarctica* OSU18  
512562 *Helicobacter pylori* Shi470  
553184 *Atopobium rimae* ATCC 49626  
555970 *Bifidobacterium animalis* subsp. *lactis* DSM 10140  
561304 *Mycobacterium leprae* Br4923  
638303 *Thermocrinis albus* DSM 14484

# 361

195099 *Campylobacter jejuni* RM1221  
242619 *Porphyromonas gingivalis* W83  
314315 *Lactobacillus sakei* subsp. *sakei* 23K  
403833 *Petroglossina mobilis* SJ95  
434923 *Coxiella burnetii* CbuG\_Q212  
476211 *Borrelia burgdorferi* 72a  
518635 *Bifidobacterium angulatum* DSM 20098 = JCM 7096  
608538 *Hydrogenobacter thermophilus* TK-6  
622759 *Zymomonas mobilis* subsp. *mobilis* NCIMB 11163

747365 *Thermodesulfobium narugense* DSM 14796

# 362

195099 *Campylobacter jejuni* RM1221  
242619 *Porphyromonas gingivalis* W83  
264199 *Streptococcus thermophilus* LMG 18311  
403833 *Petrotoga mobilis* SJ95  
434923 *Coxiella burnetii* CbuG\_Q212  
476211 *Borrelia burgdorferi* 72a  
518635 *Bifidobacterium angulatum* DSM 20098 = JCM 7096  
608538 *Hydrogenobacter thermophilus* TK-6  
622759 *Zymomonas mobilis* subsp. *mobilis* NCIMB 11163  
747365 *Thermodesulfobium narugense* DSM 14796

# 363

242619 *Porphyromonas gingivalis* W83  
306264 *Campylobacter upsaliensis* RM3195  
314315 *Lactobacillus sakei* subsp. *sakei* 23K  
375177 *Haemophilus influenzae* 3655  
403833 *Petrotoga mobilis* SJ95  
476212 *Borrelia burgdorferi* 94a  
566552 *Bifidobacterium catenulatum* DSM 16992 = JCM 1194  
572547 *Aminobacterium colombiense* DSM 12261  
608538 *Hydrogenobacter thermophilus* TK-6  
622759 *Zymomonas mobilis* subsp. *mobilis* NCIMB 11163

# 364

264201 *Candidatus Protochlamydia amoebophila* UWE25  
306254 *Campylobacter coli* RM2228  
334380 *Orientia tsutsugamushi* str. Ikeda  
351581 *Francisella tularensis* subsp. *holarctica* FSC200  
365659 *Streptococcus mitis* B6  
484019 *Thermosiphon africanus* TCF52B  
498736 *Borrelia burgdorferi* 80a  
566552 *Bifidobacterium catenulatum* DSM 16992 = JCM 1194  
591001 *Acidaminococcus fermentans* DSM 20731  
693978 *Riemerella anatipestifer* ATCC 11845 = DSM 15868

# 365

205913 *Bifidobacterium longum* DJ010A  
264201 *Candidatus Protochlamydia amoebophila* UWE25  
272843 *Pasteurella multocida* subsp. *multocida* str. Pm70

306254 *Campylobacter coli* RM2228  
334380 *Orientia tsutsugamushi* str. Ikeda  
484019 *Thermosiphon africanus* TCF52B  
498736 *Borrelia burgdorferi* 80a  
561276 *Streptococcus pneumoniae* ATCC 700669  
591001 *Acidaminococcus fermentans* DSM 20731  
693978 *Riemerella anatipestifer* ATCC 11845 = DSM 15868

# 366

264201 *Candidatus Protochlamydia amoebophila* UWE25  
306264 *Campylobacter upsaliensis* RM3195  
334380 *Orientia tsutsugamushi* str. Ikeda  
365659 *Streptococcus mitis* B6  
374932 *Haemophilus influenzae* PittHH  
484019 *Thermosiphon africanus* TCF52B  
498736 *Borrelia burgdorferi* 80a  
566552 *Bifidobacterium catenulatum* DSM 16992 = JCM 1194  
591001 *Acidaminococcus fermentans* DSM 20731  
693978 *Riemerella anatipestifer* ATCC 11845 = DSM 15868

# 367

195099 *Campylobacter jejuni* RM1221  
242619 *Porphyromonas gingivalis* W83  
262728 *Haemophilus influenzae* R2866  
264199 *Streptococcus thermophilus* LMG 18311  
403833 *Petrogorgia mobilis* SJ95  
476211 *Borrelia burgdorferi* 72a  
518635 *Bifidobacterium angulatum* DSM 20098 = JCM 7096  
608538 *Hydrogenobacter thermophilus* TK-6  
622759 *Zymomonas mobilis* subsp. *mobilis* NCIMB 11163  
747365 *Thermodesulfobium narugense* DSM 14796

# 368

242619 *Porphyromonas gingivalis* W83  
306264 *Campylobacter upsaliensis* RM3195  
314315 *Lactobacillus sakei* subsp. *sakei* 23K  
375177 *Haemophilus influenzae* 3655  
403833 *Petrogorgia mobilis* SJ95  
476212 *Borrelia burgdorferi* 94a  
518635 *Bifidobacterium angulatum* DSM 20098 = JCM 7096  
608538 *Hydrogenobacter thermophilus* TK-6  
622759 *Zymomonas mobilis* subsp. *mobilis* NCIMB 11163  
747365 *Thermodesulfobium narugense* DSM 14796

# 369

306264 *Campylobacter upsaliensis* RM3195  
334380 *Orientia tsutsugamushi* str. Ikeda  
340177 *Chlorobium chlorochromatii* CaD3  
365659 *Streptococcus mitis* B6  
374933 *Haemophilus influenzae* PittII  
484019 *Thermosipho africanus* TCF52B  
498736 *Borrelia burgdorferi* 80a  
566552 *Bifidobacterium catenulatum* DSM 16992 = JCM 1194  
591001 *Acidaminococcus fermentans* DSM 20731  
693978 *Riemerella anatipestifer* ATCC 11845 = DSM 15868

# 370

299768 *Streptococcus thermophilus* CNRZ1066  
306264 *Campylobacter upsaliensis* RM3195  
334380 *Orientia tsutsugamushi* str. Ikeda  
340177 *Chlorobium chlorochromatii* CaD3  
351581 *Francisella tularensis* subsp. *holarctica* FSC200  
476212 *Borrelia burgdorferi* 94a  
484019 *Thermosipho africanus* TCF52B  
525909 *Acidimicrobium ferrooxidans* DSM 10331  
566552 *Bifidobacterium catenulatum* DSM 16992 = JCM 1194  
693978 *Riemerella anatipestifer* ATCC 11845 = DSM 15868

# 371

242619 *Porphyromonas gingivalis* W83  
299768 *Streptococcus thermophilus* CNRZ1066  
306264 *Campylobacter upsaliensis* RM3195  
334380 *Orientia tsutsugamushi* str. Ikeda  
340177 *Chlorobium chlorochromatii* CaD3  
374932 *Haemophilus influenzae* PittHH  
476212 *Borrelia burgdorferi* 94a  
484019 *Thermosipho africanus* TCF52B  
525909 *Acidimicrobium ferrooxidans* DSM 10331  
566552 *Bifidobacterium catenulatum* DSM 16992 = JCM 1194

# 372

242619 *Porphyromonas gingivalis* W83  
299768 *Streptococcus thermophilus* CNRZ1066  
306264 *Campylobacter upsaliensis* RM3195  
309799 *Dictyoglomus thermophilum* H-6-12

334380 *Orientia tsutsugamushi* str. Ikeda  
374932 *Haemophilus influenzae* PittHH  
403833 *Petrotoga mobilis* SJ95  
476212 *Borrelia burgdorferi* 94a  
525909 *Acidimicrobium ferrooxidans* DSM 10331  
566552 *Bifidobacterium catenulatum* DSM 16992 = JCM 1194

# 373

93059 *Prochlorococcus marinus* str. MIT 9211  
195099 *Campylobacter jejuni* RM1221  
262728 *Haemophilus influenzae* R2866  
264199 *Streptococcus thermophilus* LMG 18311  
456827 *Candidatus Cloacamonas acidaminovorans*  
476211 *Borrelia burgdorferi* 72a  
518635 *Bifidobacterium angulatum* DSM 20098 = JCM 7096  
525919 *Anaerococcus prevotii* DSM 20548  
622759 *Zymomonas mobilis* subsp. *mobilis* NCIMB 11163  
747365 *Thermodesulfobium narugense* DSM 14796

# 374

242619 *Porphyromonas gingivalis* W83  
299768 *Streptococcus thermophilus* CNRZ1066  
306264 *Campylobacter upsaliensis* RM3195  
334380 *Orientia tsutsugamushi* str. Ikeda  
374932 *Haemophilus influenzae* PittHH  
403833 *Petrotoga mobilis* SJ95  
476212 *Borrelia burgdorferi* 94a  
525909 *Acidimicrobium ferrooxidans* DSM 10331  
566552 *Bifidobacterium catenulatum* DSM 16992 = JCM 1194  
608538 *Hydrogenobacter thermophilus* TK-6

# 375

205914 *Haemophilus somnus* 129PT  
218495 *Streptococcus uberis* 0140J  
307502 *Wolbachia endosymbiont* of *Drosophila ananassae*  
360111 *Campylobacter jejuni* subsp. *jejuni* CF93-6  
381764 *Fervidobacterium nodosum* Rt17-B1  
445984 *Borrelia burgdorferi* Bol26  
525903 *Thermanaerovibrio acidaminovorans* DSM 6589  
525919 *Anaerococcus prevotii* DSM 20548  
700015 *Coriobacterium glomerans* PW2  
879243 *Porphyromonas asaccharolytica* DSM 20707

# 376

206672 *Bifidobacterium longum* NCC2705  
381764 *Fervidobacterium nodosum* Rt17-B1  
445984 *Borrelia burgdorferi* Bol26  
453361 *Streptococcus pneumoniae* CDC1087-00  
515635 *Dictyoglomus turgidum* DSM 6724  
525903 *Thermanaerovibrio acidaminovorans* DSM 6589  
544406 *Helicobacter pylori* B128  
545422 *Francisella novicida* FTE  
634504 *Bartonella grahamii* as4aup  
879243 *Porphyromonas asaccharolytica* DSM 20707

# 377

242619 *Porphyromonas gingivalis* W83  
306264 *Campylobacter upsaliensis* RM3195  
314315 *Lactobacillus sakei* subsp. *sakei* 23K  
334380 *Orientia tsutsugamushi* str. Ikeda  
375177 *Haemophilus influenzae* 3655  
403833 *Petrotoga mobilis* SJ95  
476212 *Borrelia burgdorferi* 94a  
566552 *Bifidobacterium catenulatum* DSM 16992 = JCM 1194  
608538 *Hydrogenobacter thermophilus* TK-6  
622759 *Zymomonas mobilis* subsp. *mobilis* NCIMB 11163

# 378

167555 *Prochlorococcus marinus* str. NATL1A  
262724 *Thermus thermophilus* HB27  
342614 *Streptococcus agalactiae* 515  
420336 *Epulopiscium* sp. 'N.t. morphotype B'  
445983 *Borrelia burgdorferi* 156a  
456298 *Haemophilus parasuis* 29755  
523794 *Leptotrichia buccalis* C-1013-b  
553199 *Propionibacterium acnes* SK137  
563040 *Sulfurimonas autotrophica* DSM 16294  
868129 *Prevotella bivia* DSM 20514

# 379

242619 *Porphyromonas gingivalis* W83  
299768 *Streptococcus thermophilus* CNRZ1066  
306264 *Campylobacter upsaliensis* RM3195  
334380 *Orientia tsutsugamushi* str. Ikeda  
375177 *Haemophilus influenzae* 3655



403833 *Petrotoga mobilis* SJ95  
476212 *Borrelia burgdorferi* 94a  
566552 *Bifidobacterium catenulatum* DSM 16992 = JCM 1194  
608538 *Hydrogenobacter thermophilus* TK-6  
622759 *Zymomonas mobilis* subsp. *mobilis* NCIMB 11163

# 380

206672 *Bifidobacterium longum* NCC2705  
233412 *Haemophilus ducreyi* 35000HP  
360109 *Campylobacter jejuni* subsp. *doylei* 269.97  
381764 *Fervidobacterium nodosum* Rt17-B1  
445984 *Borrelia burgdorferi* Bol26  
453361 *Streptococcus pneumoniae* CDC1087-00  
521003 *Collinsella intestinalis* DSM 13280  
525903 *Thermanaerovibrio acidaminovorans* DSM 6589  
634504 *Bartonella grahamii* as4aup  
879243 *Porphyromonas asaccharolytica* DSM 20707

# 381

93059 *Prochlorococcus marinus* str. MIT 9211  
195099 *Campylobacter jejuni* RM1221  
262728 *Haemophilus influenzae* R2866  
314315 *Lactobacillus sakei* subsp. *sakei* 23K  
476211 *Borrelia burgdorferi* 72a  
518635 *Bifidobacterium angulatum* DSM 20098 = JCM 7096  
525919 *Anaerococcus prevotii* DSM 20548  
622759 *Zymomonas mobilis* subsp. *mobilis* NCIMB 11163  
700015 *Coriobacterium glomerans* PW2  
747365 *Thermodesulfobium narugense* DSM 14796

# 382

205914 *Haemophilus somnus* 129PT  
206672 *Bifidobacterium longum* NCC2705  
307502 *Wolbachia endosymbiont* of *Drosophila ananassae*  
381764 *Fervidobacterium nodosum* Rt17-B1  
445984 *Borrelia burgdorferi* Bol26  
453361 *Streptococcus pneumoniae* CDC1087-00  
521003 *Collinsella intestinalis* DSM 13280  
525903 *Thermanaerovibrio acidaminovorans* DSM 6589  
544406 *Helicobacter pylori* B128  
879243 *Porphyromonas asaccharolytica* DSM 20707

# 383

71421 *Haemophilus influenzae* Rd KW20  
192222 *Campylobacter jejuni* subsp. *jejuni* NCTC 11168 = ATCC 700819  
224326 *Borrelia burgdorferi* B31  
367928 *Bifidobacterium adolescentis* ATCC 15703  
380749 *Hydrogenobaculum* sp. Y04AAS1  
382638 *Helicobacter acinonychis* str. Sheeba  
393115 *Francisella tularensis* subsp. *tularensis* FSC198  
405566 *Lactobacillus helveticus* DPC 4571  
561304 *Mycobacterium leprae* Br4923  
868864 *Desulfurobacterium thermolithotrophum* DSM 11699

# 384

205914 *Haemophilus somnus* 129PT  
206672 *Bifidobacterium longum* NCC2705  
307502 *Wolbachia* endosymbiont of *Drosophila ananassae*  
381764 *Fervidobacterium nodosum* Rt17-B1  
445984 *Borrelia burgdorferi* Bol26  
453361 *Streptococcus pneumoniae* CDC1087-00  
525903 *Thermanaerovibrio acidaminovorans* DSM 6589  
544406 *Helicobacter pylori* B128  
700015 *Coriobacterium glomerans* PW2  
879243 *Porphyromonas asaccharolytica* DSM 20707

# 385

93059 *Prochlorococcus marinus* str. MIT 9211  
195099 *Campylobacter jejuni* RM1221  
205914 *Haemophilus somnus* 129PT  
307502 *Wolbachia* endosymbiont of *Drosophila ananassae*  
445987 *Borrelia valaisiana* VS116  
453364 *Streptococcus pneumoniae* CDC0288-04  
518635 *Bifidobacterium angulatum* DSM 20098 = JCM 7096  
525919 *Anaerococcus prevotii* DSM 20548  
700015 *Coriobacterium glomerans* PW2  
747365 *Thermodesulfobium narugense* DSM 14796

# 386

93059 *Prochlorococcus marinus* str. MIT 9211  
195099 *Campylobacter jejuni* RM1221  
262728 *Haemophilus influenzae* R2866  
307502 *Wolbachia* endosymbiont of *Drosophila ananassae*  
445987 *Borrelia valaisiana* VS116  
453364 *Streptococcus pneumoniae* CDC0288-04

518635 *Bifidobacterium angulatum* DSM 20098 = JCM 7096  
525919 *Anaerococcus prevotii* DSM 20548  
700015 *Coriobacterium glomerans* PW2  
747365 *Thermodesulfobium narugense* DSM 14796

# 387

119857 *Francisella tularensis* subsp. *holarctica*  
206672 *Bifidobacterium longum* NCC2705  
307502 *Wolbachia endosymbiont* of *Drosophila ananassae*  
445984 *Borrelia burgdorferi* Bol26  
453361 *Streptococcus pneumoniae* CDC1087-00  
525903 *Thermanaerovibrio acidaminovorans* DSM 6589  
525919 *Anaerococcus prevotii* DSM 20548  
544406 *Helicobacter pylori* B128  
700015 *Coriobacterium glomerans* PW2  
879243 *Porphyromonas asaccharolytica* DSM 20707

# 388

85962 *Helicobacter pylori* 26695  
192222 *Campylobacter jejuni* subsp. *jejuni* NCTC 11168 = ATCC 700819  
224326 *Borrelia burgdorferi* B31  
243164 *Dehalococcoides ethenogenes* 195  
367928 *Bifidobacterium adolescentis* ATCC 15703  
374930 *Haemophilus influenzae* PittEE  
380749 *Hydrogenobaculum* sp. Y04AAS1  
390333 *Lactobacillus delbrueckii* subsp. *bulgaricus* ATCC 11842  
393115 *Francisella tularensis* subsp. *tularensis* FSC198  
561304 *Mycobacterium leprae* Br4923

# 389

71421 *Haemophilus influenzae* Rd KW20  
192222 *Campylobacter jejuni* subsp. *jejuni* NCTC 11168 = ATCC 700819  
224326 *Borrelia burgdorferi* B31  
367928 *Bifidobacterium adolescentis* ATCC 15703  
380749 *Hydrogenobaculum* sp. Y04AAS1  
382638 *Helicobacter acinonychis* str. Sheeba  
393115 *Francisella tularensis* subsp. *tularensis* FSC198  
405566 *Lactobacillus helveticus* DPC 4571  
411465 *Parvimonas micra* ATCC 33270  
561304 *Mycobacterium leprae* Br4923

# 390

224326 *Borrelia burgdorferi* B31  
 272631 *Mycobacterium leprae* TN  
 360107 *Campylobacter hominis* ATCC BAA-381  
 367928 *Bifidobacterium adolescentis* ATCC 15703  
 374930 *Haemophilus influenzae* PittEE  
 380749 *Hydrogenobaculum* sp. Y04AAS1  
 382638 *Helicobacter acinonychis* str. Sheeba  
 393115 *Francisella tularensis* subsp. *tularensis* FSC198  
 405566 *Lactobacillus helveticus* DPC 4571  
 411465 *Parvimonas micra* ATCC 33270

# 391

2110 *Mycoplasma agalactiae*  
 95662 *Ureaplasma urealyticum* serovar 8  
 203267 *Tropheryma whipplei* str. Twist  
 257363 *Rickettsia typhi* str. Wilmington  
 272947 *Rickettsia prowazekii* str. Madrid E  
 292805 *Wolbachia endosymbiont* strain TRS of *Brugia malayi*  
 314723 *Borrelia hermsii* DAH  
 314724 *Borrelia turicatae* 91E135  
 332415 *Ehrlichia chaffeensis* str. Sapulpa  
 340047 *Mycoplasma capricolum* subsp. *capricolum* ATCC 27343

# 392

2110 *Mycoplasma agalactiae*  
 95662 *Ureaplasma urealyticum* serovar 8  
 203267 *Tropheryma whipplei* str. Twist  
 218496 *Tropheryma whipplei* TW08/27  
 272635 *Mycoplasma pulmonis* UAB CTIP  
 292805 *Wolbachia endosymbiont* strain TRS of *Brugia malayi*  
 314723 *Borrelia hermsii* DAH  
 314724 *Borrelia turicatae* 91E135  
 332415 *Ehrlichia chaffeensis* str. Sapulpa  
 340047 *Mycoplasma capricolum* subsp. *capricolum* ATCC 27343

## 8 Branch lengths and AICs

# group,mean branch length,starness,AIC\_A,AIC\_B,AIC\_C,AIC\_D  
 1,0.002145,0.424372759856631,-0.762497,-14.8684,-12.5064,-16.3677  
 2,0.004837,0.327665317139001,-6.23579,-15.3834,-23.206,-17.3506  
 3,0.006014,0.317697841726619,2.36828,-9.96101,-13.2039,-16.3255  
 4,0.017595,0.321339434276206,2.35116,-8.59394,-13.0881,-11.8394  
 5,0.01837,0.316998341625207,-0.121898,-3.86915,-11.0026,-8.98409

6,0.029227,0.329421720733427,-1.48357,-2.64225,-10.3076,-9.62952  
7,0.03201,0.312285480795424,-4.0044,-4.92424,-13.998,-10.9644  
8,0.033017,0.301856335754641,4.14718,4.23086,-3.2514,-1.02741  
9,0.042381,0.316513386470468,-5.51885,-9.45743,-26.7544,-20.3119  
10,0.064715,0.337087912087912,-1.82122,-13.5813,-18.7926,-19.0539  
11,0.073075,0.311365475777547,-4.19177,-19.6564,-23.0474,-21.319  
12,0.075029,0.307422823447797,-5.3567,-8.02841,-16.9606,-13.5739  
13,0.082322,0.357802050824788,0.626494,-2.90461,-10.1097,-8.47701  
14,0.086183,0.471554074522872,-3.12968,-22.1831,-22.1623,-26.8778  
15,0.088503,0.468407237273835,-5.73247,-27.5162,-32.3327,-37.8199  
16,0.103068,0.325540609569215,-7.16866,-13.9601,-19.6422,-18.2808  
17,0.105677,0.431879769506307,-3.24437,-12.0005,-12.4944,-14.2826  
18,0.113241,0.372454318602592,-3.19197,-13.2729,-16.8214,-16.7067  
19,0.116173,0.43168968725399,-3.60825,-24.2087,-26.3,-32.5752  
20,0.117907,0.44814898932546,-3.40176,-30.7033,-21.6536,-30.2999  
21,0.120271,0.409625706720103,-4.99294,-28.6933,-31.9322,-35.879  
22,0.12332,0.348850531393683,-2.85211,-5.68786,-11.0313,-10.2121  
23,0.194852,0.472927766076075,-0.324677,-27.4037,-17.4661,-25.6619  
24,0.205083,0.500912732829472,1.64161,-25.0898,-12.0537,-21.3383  
25,0.208674,0.47945632798574,1.67376,-24.7633,-12.2466,-21.8748  
26,0.221582,0.373906866614049,-1.87234,-17.8956,-36.3456,-30.5124  
27,0.2228,0.319724875811998,-1.58687,-8.86154,-17.9672,-15.8738  
28,0.225967,0.348910133843212,-2.49891,-19.9724,-30.5571,-23.5343  
29,0.230216,0.357927649806064,-1.57117,-23.892,-18.9601,-16.8893  
30,0.231072,0.349977072984333,-4.0261,-17.7893,-31.6392,-23.5825  
31,0.235919,0.386644219977553,-4.04563,-15.1827,-21.3642,-19.9645  
32,0.239643,0.391980325064157,-2.07429,-21.0193,-32.636,-31.0367  
33,0.242351,0.366521950671807,-5.42216,-30.8388,-42.4472,-31.917  
34,0.243655,0.400779609127479,-1.69765,-20.2016,-30.9362,-37.9028  
35,0.247558,0.397345953971789,-4.4074,-29.4464,-31.4488,-27.5012  
36,0.251682,0.384570616967472,-1.61092,-30.1169,-20.715,-21.9478  
37,0.252493,0.320103054290195,-3.23224,-12.5347,-15.1001,-13.8102  
38,0.257694,0.351815937309908,-1.15056,-25.3399,-25.9143,-34.6503  
39,0.258855,0.39158466236851,-5.54821,-23.5661,-31.8466,-30.9166  
40,0.263652,0.391997368238798,-2.53805,-30.3022,-20.0843,-19.8603  
41,0.266798,0.316604817488699,-1.50328,-18.548,-24.8062,-31.4136  
42,0.267011,0.317323392483638,-1.49398,-17.2762,-25.1607,-30.6253  
43,0.272281,0.412952576714139,-3.29601,-22.8561,-25.6332,-30.2085  
44,0.275698,0.449935029949609,-1.63439,-23.8379,-20.9191,-27.3266  
45,0.277294,0.454993186067886,-1.9955,-23.8835,-23.04,-29.9094  
46,0.281912,0.451389725224226,-4.68853,-21.702,-24.701,-23.0203  
47,0.284381,0.448207777390423,-5.15066,-19.3962,-22.8511,-21.2977  
48,0.286759,0.454302285044211,-4.29937,-29.1394,-39.0687,-33.8016  
49,0.288383,0.459449180743511,-5.01569,-29.7679,-38.9686,-35.3473  
50,0.291033,0.427771257555308,-2.69905,-26.9567,-26.6523,-34.7971  
51,0.29605,0.433821164799826,-3.47793,-30.4853,-24.0601,-30.751

52,0.299991,0.385837514303318,-4.64238,-29.8482,-36.2016,-32.4367  
53,0.301726,0.406320191158901,-4.67014,-29.1023,-28.5667,-25.8688  
54,0.305145,0.361151248164464,-2.79309,-22.996,-27.3594,-29.3326  
55,0.308255,0.468209466149885,-0.99522,-25.2109,-21.5211,-30.8073  
56,0.311911,0.463221772710555,-3.97304,-30.1941,-24.8844,-27.5127  
57,0.314003,0.468189662489037,-3.62058,-22.6755,-29.8252,-28.3334  
58,0.315613,0.472744504484115,-4.01441,-22.5357,-29.4998,-29.465  
59,0.318684,0.452440795205534,-3.05914,-35.2488,-24.7531,-34.5551  
60,0.32307,0.435448552918211,-4.35693,-25.9134,-33.0313,-34.5846  
61,0.32524,0.428333471680363,-4.57506,-28.397,-36.3405,-34.5038  
62,0.329892,0.367278487927455,-2.87726,-12.9657,-18.3559,-16.8224  
63,0.330093,0.361686668299453,-2.10941,-12.5741,-18.3054,-17.0641  
64,0.335815,0.418769115200944,-4.41093,-16.0899,-22.7262,-22.7751  
65,0.336086,0.419496163545635,-5.28559,-17.2913,-25.3409,-24.8227  
66,0.342117,0.334691683242836,-3.62024,-12.1628,-11.7348,-10.0387  
67,0.41237,0.336322346223722,-2.49564,-48.0461,-21.8116,-21.3408  
68,0.415985,0.343892026202846,-3.82188,-19.1265,-21.3867,-20.376  
69,0.422157,0.380510497148174,-2.56829,-13.1789,-21.9973,-21.1507  
70,0.423623,0.401925488451114,-4.80434,-13.7125,-21.3309,-20.7613  
71,0.427982,0.310004908515428,-6.50255,-8.2119,-18.8621,-14.45  
72,0.430397,0.313860632013676,-5.09864,-7.11227,-15.7347,-12.832  
73,0.432716,0.319649295035629,-3.7159,-8.11517,-16.4504,-15.7806  
74,0.439461,0.363558504426127,-5.63666,-16.2937,-23.5343,-21.2874  
75,0.443265,0.385343849968687,-6.03891,-12.8946,-24.5262,-20.4913  
76,0.448519,0.515674074626031,-2.53815,-25.3955,-25.654,-36.121  
77,0.452367,0.508783057211074,-1.57869,-24.4289,-22.7592,-34.8809  
78,0.455772,0.491954198765125,-3.28282,-34.043,-26.1898,-34.765  
79,0.458924,0.516153717254092,1.36707,-16.9511,-18.0069,-23.6051  
80,0.45912,0.548112979202741,-2.21978,-15.7428,-26.4615,-33.955  
81,0.463709,0.547143177235044,-2.67956,-18.9587,-26.6207,-33.5869  
82,0.465507,0.550500410784973,-2.71127,-20.2261,-27.6231,-36.8095  
83,0.469893,0.477121064301552,-1.76521,-23.0845,-23.9987,-36.2525  
84,0.472357,0.445703343919298,-4.12218,-36.2348,-26.3026,-33.5177  
85,0.475958,0.401962410692405,-2.38859,-13.8854,-21.7406,-24.9367  
86,0.479348,0.488607594936709,-3.51973,-31.7696,-30.8399,-41.449  
87,0.482396,0.435508647450111,-3.85998,-28.8356,-36.6035,-57.2887  
88,0.485433,0.36974506101104,-0.538657,-27.2119,-20.4823,-30.2381  
89,0.487084,0.486745516130823,-1.6446,-16.1308,-24.967,-25.7616  
90,0.490678,0.434127798684761,-0.190331,-18.2628,-21.5183,-26.747  
91,0.49456,0.530380037844625,-0.128022,-25.8425,-18.3858,-27.0961  
92,0.497389,0.49583709126921,-2.0266,-31.2039,-22.4374,-30.8141  
93,0.499458,0.561903251946588,-2.19696,-18.4708,-26.2159,-37.4474  
94,0.502267,0.528003157323511,2.68724,-20.9556,-11.818,-18.9081  
95,0.505516,0.568193643998024,-1.37744,-23.652,-23.1557,-35.873  
96,0.509988,0.562042487421487,0.266002,-24.4425,-19.2481,-29.7311  
97,0.510114,0.535023819473464,0.40255,-22.2233,-16.9689,-26.037

98,0.514924,0.550027580442959,0.669782,-21.2501,-15.2282,-23.6042  
99,0.517282,0.464550848406339,-2.46287,-29.7995,-26.7896,-43.3622  
100,0.524996,0.482781196805028,-3.12907,-20.4355,-27.838,-41.1893  
101,0.526255,0.451847911483567,-3.45777,-29.7514,-30.5984,-47.9788  
102,0.53083,0.475835260467381,-1.81437,-14.0236,-8.90176,-13.0638  
103,0.532673,0.517846455956611,-2.11052,-28.2157,-17.8429,-26.0812  
104,0.536456,0.450029841369562,-1.15713,-19.4128,-29.9309,-36.9149  
105,0.537463,0.437708617366367,-1.87213,-25.51,-23.0272,-38.1091  
106,0.542906,0.471784099242239,-1.92146,-22.9505,-21.0617,-30.7907  
107,0.545553,0.489511716114718,-1.34265,-17.7687,-25.1101,-35.1371  
108,0.548904,0.509584900403956,-3.21962,-27.5759,-29.7564,-38.32  
109,0.551292,0.515022986378969,0.489726,-18.9489,-21.46,-34.9678  
110,0.554525,0.586539976825029,0.172997,-16.9375,-19.6652,-30.5526  
111,0.556736,0.582273288705226,0.341597,-21.8535,-19.0569,-30.5874  
112,0.558101,0.568313806910871,0.781744,-17.3982,-18.8399,-29.2647  
113,0.5634,0.533548592609753,-0.672716,-21.559,-22.4866,-31.2262  
114,0.564568,0.562680126259931,0.585174,-19.3098,-20.2176,-30.7537  
115,0.567324,0.552124978272206,-0.138731,-20.0232,-20.1943,-33.2131  
116,0.57261,0.57658608927777,0.598475,-20.3894,-17.7279,-28.4556  
117,0.57399,0.574860764634217,-0.467955,-19.1994,-20.6559,-32.299  
118,0.577203,0.579703429101019,0.222747,-24.3306,-20.1837,-33.0284  
119,0.581917,0.590556232475521,1.38799,-15.3704,-14.9836,-24.9223  
120,0.582722,0.588541225598271,1.63651,-14.7351,-14.6182,-24.283  
121,0.587411,0.552612397141311,-1.47356,-24.3653,-24.2389,-40.3402  
122,0.589999,0.576642229803295,-1.15325,-31.6126,-25.3452,-34.36  
123,0.592317,0.56776131531976,-1.44003,-24.4328,-24.5532,-36.7915  
124,0.595186,0.578675369608513,-1.64004,-20.9884,-22.7225,-34.2343  
125,0.599763,0.559424934217296,-0.600708,-19.1116,-23.2679,-37.7845  
126,0.601832,0.564752848951151,-1.87865,-22.7962,-28.6458,-33.2324  
127,0.604638,0.525260820677778,-1.81169,-21.35,-27.1939,-43.4136  
128,0.606864,0.483247706166548,-5.75989,-22.5699,-35.0001,-32.4183  
129,0.611619,0.533239743043203,-0.498424,-18.2718,-27.8239,-35.9247  
130,0.612603,0.367303014353386,-3.02554,-10.8868,-16.518,-15.7263  
131,0.617317,0.370962832311566,-2.97358,-11.1847,-21.3076,-16.4865  
132,0.623621,0.514265625217549,-4.23207,-26.8799,-31.5195,-41.4509  
133,0.626124,0.470943648702159,-4.18978,-22.0964,-22.0423,-26.4466  
134,0.627074,0.464308811641067,-5.47848,-25.479,-40.4357,-42.2939  
135,0.63243,0.414130768158372,-1.44439,-12.573,-23.7222,-28.597  
136,0.635144,0.379265300432176,-3.9968,-12.7559,-29.1716,-26.7925  
137,0.641167,0.655817114012523,1.11011,-14.9857,-18.3103,-31.4093  
138,0.642429,0.433610236110724,-4.49928,-13.3709,-35.1017,-29.04  
139,0.647683,0.327243389830508,-8.06729,-21.7593,-18.141,-14.859  
140,0.650449,0.651061381674729,-1.46068,-18.7235,-23.3944,-32.8982  
141,0.653767,0.65823040435824,-0.841771,-23.1035,-20.933,-31.5441  
142,0.654259,0.661442508372567,1.1486,-11.8525,-17.1569,-28.3298  
143,0.658699,0.644015638942375,-1.23331,-24.2962,-21.3743,-31.8955

144,0.661261,0.681279425326409,0.759466,-16.0054,-19.7114,-32.9609  
145,0.663515,0.490119322033898,-5.39004,-18.7501,-22.5528,-22.4403  
146,0.667848,0.567180750376159,-3.85239,-20.5998,-32.2786,-40.9471  
147,0.669528,0.658177207202835,0.809149,-20.439,-18.6678,-34.5387  
148,0.672752,0.669653691210018,0.743172,-19.5614,-19.6678,-39.3971  
149,0.677427,0.619553374348377,-1.41129,-26.6725,-20.9406,-36.8275  
150,0.678746,0.592036770782625,-1.68079,-26.9578,-20.7354,-31.8158  
151,0.682841,0.626763676345196,0.880691,-17.7859,-17.2857,-28.3222  
152,0.684339,0.660186623307285,-0.220896,-20.1531,-20.4409,-33.5193  
153,0.688173,0.514091394457118,-3.28928,-17.427,-20.6657,-24.0151  
154,0.692675,0.669240460763139,-0.610913,-20.7009,-23.0231,-40.1731  
155,0.695962,0.59290703526841,-4.56626,-26.0297,-24.5823,-26.3632  
156,0.698778,0.600549746443477,-3.0887,-22.3134,-24.1359,-30.9089  
157,0.700868,0.677560634935666,-0.978554,-14.7741,-22.7675,-31.2279  
158,0.702278,0.570191644524846,-3.00641,-22.7702,-28.1792,-61.4059  
159,0.705006,0.451185607402398,-8.01358,-19.6353,-29.429,-25.938  
160,0.709118,0.683572288121025,2.14743,-13.5672,-16.2947,-23.4401  
161,0.712617,0.572636757012766,-4.43625,-26.3739,-30.9229,-45.8575  
162,0.71542,0.698789296856252,0.0344707,-20.3932,-21.8495,-47.3307  
163,0.719401,0.659130892579025,2.00632,-19.0186,-17.1837,-27.5713  
164,0.720195,0.489979497418392,-5.91763,-21.129,-29.431,-27.1091  
165,0.72351,0.654190052047003,-0.0325746,-18.5379,-18.8556,-34.7475  
166,0.727069,0.38296930514299,-2.34731,-20.6035,-27.3992,-45.707  
167,0.731524,0.380490345414632,-8.26944,-19.3948,-21.7617,-22.9663  
168,0.73225,0.671890325696196,0.782076,-17.9574,-17.4925,-32.1072  
169,0.736537,0.301020978708177,-8.33222,-14.4811,-19.5228,-14.8481  
170,0.738772,0.678358961984776,1.57976,-15.2563,-17.3876,-27.5327  
171,0.741128,0.601281362105471,-1.41334,-20.1094,-24.9235,-84.8543  
172,0.744263,0.648367031255143,2.39413,-13.3943,-16.3835,-29.2024  
173,0.747548,0.470588608666215,2.99,-23.6032,-18.3967,-28.7694  
174,0.751067,0.374244109947644,-7.75899,-22.4402,-23.5263,-25.4193  
175,0.755489,0.678029278617203,0.755442,-15.1548,-17.6007,-28.8836  
176,0.75733,0.6534255592246,2.32777,-11.4568,-15.7111,-26.6702  
177,0.760993,0.553418976885018,-2.44895,-16.5965,-24.1463,-30.5898  
178,0.763151,0.481270955739376,-7.63898,-25.2558,-44.3818,-36.083  
179,0.765184,0.722740404915883,3.8251,-12.3042,-15.3274,-22.6792  
180,0.769006,0.603616172506739,2.42049,-16.6953,-18.2407,-29.9731  
181,0.772785,0.507677653683913,3.23799,-12.6743,-14.984,-25.6462  
182,0.775809,0.517868469807509,3.98446,-11.1837,-13.7074,-23.9777  
183,0.779923,0.719303351167424,2.92686,-14.0706,-15.0281,-25.6808  
184,0.781161,0.674403549014357,-0.0475032,-20.2477,-19.5504,-32.6749  
185,0.783568,0.735904039190102,2.88769,-14.1606,-14.3279,-24.6562  
186,0.788447,0.704927376987261,1.11847,-17.8254,-18.2234,-33.126  
187,0.791909,0.666374269005848,3.48713,-12.0918,-16.7142,-30.0839  
188,0.794076,0.691498789109588,2.31534,-17.6059,-16.2189,-28.8275  
189,0.796504,0.501580754596356,-3.10746,-18.5751,-29.5685,-32.2839



190,0.800833,0.696718529901396,3.62069,-9.28081,-13.7071,-24.2641  
191,0.803496,0.658048405685747,1.69826,-16.8603,-19.6107,-33.9005  
192,0.804357,0.673568958893584,2.76992,-13.2404,-15.7725,-26.0186  
193,0.809009,0.757790520665225,3.15638,-14.9194,-14.3782,-25.5649  
194,0.810036,0.674048010323933,1.74427,-15.9294,-16.1895,-30.364  
195,0.813629,0.662515709133265,1.32998,-18.1927,-18.9118,-33.9396  
196,0.817664,0.621599185375552,1.12189,-23.7043,-20.9922,-44.0105  
197,0.819755,0.745224425887265,4.38287,-9.69605,-12.8388,-22.4968  
198,0.823651,0.599774749175975,-0.577134,-21.1517,-23.3724,-39.8485  
199,0.827598,0.661174897851375,-1.08236,-28.6564,-23.5579,-42.2936  
200,0.828111,0.661727955841608,-1.79342,-28.2309,-26.8029,-37.4069  
201,0.831451,0.703063277340072,3.61595,-11.2452,-12.9812,-22.9655  
202,0.835552,0.751071478694577,3.77971,-11.1378,-13.4025,-22.8187  
203,0.839584,0.713981712222593,4.90189,-10.4009,-12.5406,-22.399  
204,0.840062,0.776049060542798,4.89883,-7.32108,-11.9522,-21.4915  
205,0.845467,0.749547356645675,3.78666,-12.3324,-14.2106,-25.3338  
206,0.847777,0.625401735925908,2.29753,-19.3733,-14.9561,-26.7065  
207,0.849479,0.766055323590814,4.37699,-9.02327,-12.3811,-21.89  
208,0.854043,0.719771129321631,4.72575,-9.97294,-13.715,-24.2311  
209,0.855254,0.601226398786086,-0.990767,-20.4993,-24.7639,-43.5243  
210,0.85986,0.766780223991824,3.20747,-14.2103,-14.2538,-24.0309  
211,0.863295,0.71042327931841,0.329317,-17.4425,-24.7216,-35.612  
212,0.866891,0.761693766665998,3.12749,-10.2674,-14.6665,-8.6062  
213,0.868756,0.714303900351551,3.50795,-10.5324,-14.9817,-25.6071  
214,0.872153,0.67430462516747,3.05794,-27.7097,-13.9393,-22.2788  
215,0.875707,0.535751403251169,-1.0308,-17.3752,-28.4806,-40.5607  
216,0.878422,0.693580945873395,0.654484,-18.0125,-17.9471,-31.9866  
217,0.880665,0.749184876864377,3.60324,-11.1012,-14.1916,-24.303  
218,0.883859,0.630127971083282,0.114001,-20.0703,-21.1481,-36.3223  
219,0.887878,0.746409764260052,4.2787,-5.91397,-13.1657,-22.1439  
220,0.889369,0.805805283888152,5.12141,-8.22644,-11.6135,-21.1147  
221,0.89347,0.782913968362171,1.60791,-11.2313,-17.7415,-26.2175  
222,0.896119,0.769616867587486,3.37168,-10.5534,-13.9985,-24.3713  
223,0.89849,0.719726460772777,2.86274,-11.9457,-16.0158,-26.4619  
224,0.900408,0.754436686984865,4.0513,-7.45395,-12.8308,-21.2779  
225,0.903931,0.819761618280731,4.75716,-9.6242,-12.0852,-22.4548  
226,0.907934,0.774966129016308,3.65763,-11.8533,-13.5104,-24.0264  
227,0.909373,0.776389204798307,3.66627,-11.4715,-13.4422,-24.1479  
228,0.914529,0.782794886026527,5.064,-8.20715,-10.8654,-19.7904  
229,0.917231,0.76861915169256,3.90084,-8.85165,-13.6806,-24.4562  
230,0.92083,0.812464090354571,4.0507,-8.88596,-12.9472,-23.6302  
231,0.921487,0.788369149220226,3.9248,-9.65542,-13.2341,-23.8532  
232,0.925436,0.792010416460384,4.80469,-12.2468,-11.7545,-21.534  
233,0.927584,0.731919820121514,2.27204,-17.777,-18.3597,-31.4537  
234,0.930655,0.696585526188589,-0.51197,-17.8078,-24.9781,-44.5858  
235,0.933912,0.693224039636849,2.68802,-14.2285,-16.9719,-26.9225

236,0.937997,0.785410181551014,5.04673,-12.5713,-11.6371,-21.6447  
237,0.941285,0.767879530697405,5.30854,-6.53808,-11.8891,-21.5633  
238,0.943458,0.746647887851167,4.35865,-13.3658,-13.7614,-24.6059  
239,0.947957,0.724202061052417,2.99257,-11.0309,-15.2045,-25.0348  
240,0.949234,0.752290434314263,2.23472,-15.1308,-16.8973,-29.301  
241,0.952407,0.778285398851069,5.94171,-8.4599,-10.4516,-19.5433  
242,0.95687,0.72507582691721,1.84656,-18.7599,-19.3908,-8.44345  
243,0.957652,0.536374821549328,0.842264,-16.2351,-22.5491,-33.3401  
244,0.960087,0.701337215670525,2.1335,-15.2038,-18.9342,-32.1403  
245,0.96585,0.797156521487595,3.89414,-11.4618,-14.114,-24.8718  
246,0.968829,0.7235369842043,4.24751,-11.6391,-13.5504,-23.3699  
247,0.970652,0.776952329340534,4.16251,-12.3248,-14.3954,-25.1865  
248,0.972675,0.703171957918257,1.90852,-19.3433,-20.37,-32.2304  
249,0.976936,0.685728910549756,3.05974,-10.1774,-16.5379,-27.9345  
250,0.97994,0.759279848617914,5.78066,-9.66956,-12.1683,-21.454  
251,0.981857,0.722575847192262,3.37031,-14.2077,-14.936,-25.7297  
252,0.986302,0.724340359235877,1.34216,-16.2806,-21.8236,-35.5629  
253,0.989641,0.812313596282401,5.09159,-9.76423,-11.7469,-21.8299  
254,0.990901,0.692514284786702,2.21004,-15.3391,-16.1378,-28.4559  
255,0.994172,0.694629309311366,2.70753,-13.0381,-14.835,-26.5665  
256,0.997113,0.814557826923613,5.856,-9.06282,-11.6914,-21.2979  
257,1.001962,0.813142671784614,5.42961,-10.6049,-11.2518,-21.0628  
258,1.003013,0.814089672199095,5.37492,-10.7015,-11.3442,-21.0752  
259,1.006007,0.789745150985687,6.10377,-7.76904,-11.7077,-20.9651  
260,1.010419,0.783924568927481,6.34738,-6.50724,-11.0913,-19.3711  
261,1.012484,0.791410689360169,6.21853,-9.65727,-11.6569,-21.5442  
262,1.016558,0.810815481548155,6.19707,-10.4957,-11.4025,-20.47  
263,1.019451,0.816969396939694,6.24628,-8.95721,-11.3722,-20.3817  
264,1.022018,0.800077200439589,5.42685,-8.47105,-10.7752,-19.7424  
265,1.024472,0.793850462737457,6.11221,-8.62422,-11.3885,-20.4376  
266,1.026974,0.800339583900038,6.21205,-7.45349,-10.7425,-19.7143  
267,1.030048,0.784123956658765,5.33365,-8.61438,-10.6947,-19.4076  
268,1.032131,0.795015882080017,5.47197,-9.40772,-11.2026,-20.7166  
269,1.03652,0.76559532823338,2.62926,-12.2929,-15.6597,-27.3237  
270,1.040969,0.723429167337872,2.58256,-15.6651,-15.697,-26.3386  
271,1.04332,0.779698167750712,5.93717,-8.68144,-13.4271,-22.9266  
272,1.044812,0.802526965901183,6.11841,-9.51978,-12.1818,-21.9264  
273,1.047285,0.804678148921364,6.54198,-11.0104,-11.4391,-21.1683  
274,1.05019,0.78552073918728,5.31805,-6.91451,-9.97103,-17.8662  
275,1.053875,0.792712547054746,5.50127,-7.04579,-10.4677,-18.6735  
276,1.057996,0.789803041422744,6.41042,-6.97799,-11.6216,-20.9593  
277,1.059259,0.790880852007987,6.25672,-8.43295,-11.6914,-20.5877  
278,1.062766,0.776835829944174,5.17298,-9.69218,-10.9587,-19.6774  
279,1.066344,0.787221465470713,5.30302,-7.42158,-11.7663,-21.2414  
280,1.069524,0.798540508080729,2.05488,-13.1895,-17.0862,-28.2394  
281,1.072878,0.801321887823725,4.44785,-10.5642,-12.5191,-22.5074

282,1.074584,0.78137666498061,6.43473,-6.8008,-11.7241,-20.0934  
283,1.077097,0.799742945907988,5.21614,-7.81075,-11.8501,-21.908  
284,1.082282,0.784919856607195,4.91486,-8.58541,-12.5959,-22.2542  
285,1.084838,0.799049415251454,4.62026,-10.2926,-13.6512,-24.9332  
286,1.088163,0.794856055439075,5.06099,-8.80079,-11.3855,-20.7375  
287,1.090346,0.7831084923153,5.1937,-7.60133,-11.3757,-20.3646  
288,1.092007,0.797352742101261,4.74894,-7.74885,-12.8339,-22.4194  
289,1.097836,0.774469055536666,4.43138,-9.82634,-12.9232,-22.9084  
290,1.098203,0.791992725127802,5.77309,-11.4527,-11.2924,-21.2163  
291,1.101611,0.738043321573537,6.70065,-4.03677,-10.4416,-18.4713  
292,1.106296,0.789157514008326,3.97549,-11.5349,-14.6252,-26.1528  
293,1.108733,0.793008245499641,5.27329,-9.50064,-12.1411,-22.4643  
294,1.111227,0.762014616890808,5.88321,-8.76096,-10.8509,-19.8215  
295,1.113705,0.736146132220387,5.7212,-10.5777,-10.468,-19.3232  
296,1.1184,0.803362989906934,6.39315,-9.1669,-10.3732,-19.6284  
297,1.119391,0.78813710903518,5.80828,-7.23043,-11.2533,-20.1124  
298,1.122204,0.765459471414354,6.73226,-7.69313,-12.4227,-21.4018  
299,1.126315,0.766413145758969,4.38916,-10.2739,-12.6456,-21.9272  
300,1.130835,0.813550268711496,6.37355,-9.50071,-11.1301,-21.0324  
301,1.131886,0.814411292436754,6.30099,-9.1559,-10.9432,-20.6732  
302,1.135341,0.787405458730681,4.53439,-10.3594,-14.2106,-25.6932  
303,1.139727,0.733375667147142,5.38467,-9.38741,-12.8486,-21.5047  
304,1.140997,0.762625314550648,4.35018,-9.25334,-15.4428,-26.6583  
305,1.145981,0.758012518025806,4.72335,-11.5548,-13.8033,-23.9045  
306,1.146879,0.758690514839674,4.7965,-11.8256,-13.6125,-24.292  
307,1.151087,0.796412915726946,6.70932,-8.91357,-9.6587,-18.4641  
308,1.152574,0.797593786728503,6.59072,-9.36304,-10.2299,-19.5118  
309,1.155337,0.760414480587618,3.0283,-12.5551,-17.3538,-29.3891  
310,1.159158,0.763278369060111,3.98204,-11.3969,-15.1434,-27.2339  
311,1.162782,0.768810301488628,4.85799,-11.4515,-12.0703,-22.3306  
312,1.16606,0.808303421111147,6.49802,-9.83928,-10.9068,-20.6973  
313,1.168159,0.809970299545758,6.52929,-9.30436,-10.7296,-20.3449  
314,1.171008,0.733999797016137,2.20467,-12.9037,-19.0048,-30.1623  
315,1.173418,0.722929207848107,3.48369,-11.189,-14.3233,-24.7935  
316,1.178646,0.735103164475288,4.71206,-13.274,-13.6683,-25.4082  
317,1.180375,0.759411704477306,5.70713,-11.5757,-11.6407,-21.8182  
318,1.182092,0.71949082152845,3.94611,-9.30456,-13.1096,-23.1232  
319,1.186536,0.760879224941725,3.63257,-12.8069,-16.8736,-28.716  
320,1.19079,0.763978001165501,3.61506,-12.031,-16.9976,-28.4207  
321,1.191589,0.76089080918067,3.70996,-11.8303,-16.0706,-27.0399  
322,1.194611,0.766761363636364,4.78696,-10.0866,-13.9762,-24.6585  
323,1.199592,0.740704682096684,3.6924,-16.2268,-13.9538,-23.9647  
324,1.202421,0.747772066045785,5.79929,-13.4365,-10.1167,-20.1127  
325,1.203487,0.756991537497151,4.65111,-12.1664,-13.8572,-24.9857  
326,1.208749,0.752585922601552,4.63578,-10.6584,-14.1968,-24.841  
327,1.210148,0.745453579699573,2.8145,-12.1092,-14.0888,-23.351

328,1.212856,0.763665374971507,5.23007,-11.4028,-12.0552,-22.0365  
329,1.217301,0.738803390958859,2.36122,-13.9157,-16.2019,-28.0267  
330,1.218289,0.752224820995537,3.26804,-17.3107,-15.3989,-27.7545  
331,1.221656,0.740397270896919,4.3158,-11.7782,-11.8979,-22.3307  
332,1.224923,0.728745612414558,4.44925,-11.3375,-14.297,-25.9441  
333,1.229502,0.745425457232588,5.3176,-10.9262,-12.9551,-24.1149  
334,1.231753,0.755492082859599,5.5655,-10.9837,-12.5182,-23.0924  
335,1.233482,0.760424588540844,4.22347,-9.21317,-12.0778,-20.5625  
336,1.23894,0.760474612462217,5.42953,-10.4727,-12.7855,-23.7648  
337,1.240563,0.702066143512848,2.84025,-13.1202,-19.9818,-30.7282  
338,1.243493,0.733212537650602,5.93746,-9.43059,-11.8018,-21.4358  
339,1.247062,0.757424918569112,2.81877,-17.9913,-15.4931,-27.9434  
340,1.250483,0.607283529613915,-1.31058,-23.0771,-23.7311,-33.5573  
341,1.251664,0.732086985069514,1.14525,-19.1756,-19.7578,-32.0738  
342,1.254646,0.655778598501909,-1.75547,-17.1068,-26.7524,-50.2573  
343,1.257909,0.710379464285714,4.44571,-12.2612,-11.3587,-21.393  
344,1.260629,0.712208207831325,4.71879,-12.7013,-11.2454,-21.0413  
345,1.265144,0.6070912142961,1.09102,-21.2307,-19.4168,-31.4442  
346,1.266296,0.734652203353825,4.18358,-15.891,-14.5122,-25.8746  
347,1.27047,0.688618160357474,4.15718,-13.8395,-16.596,-28.2354  
348,1.273,0.690258961172038,4.02103,-15.2804,-17.5143,-30.5497  
349,1.275696,0.753798676850258,5.65643,-8.54156,-10.5362,-20.0269  
350,1.280791,0.706141497831575,2.11006,-14.1383,-22.3088,-42.2014  
351,1.281985,0.728134041805251,3.81888,-13.8209,-17.5519,-28.8627  
352,1.284234,0.746132072934595,4.883,-12.0579,-11.9348,-22.2381  
353,1.287601,0.748395815404475,5.03021,-11.4379,-10.6426,-20.269  
354,1.29006,0.733592926097185,4.64175,-12.8041,-16.2874,-28.787  
355,1.294379,0.709591851262239,2.14626,-14.9324,-22.21,-41.2996  
1,1.296361,0.314703134029238,-2.57488,-5.24412,-10.0653,-8.15944  
357,1.301329,0.69873990867228,5.08951,-9.70121,-13.5161,-24.7222  
358,1.303118,0.73467743006227,3.2508,-17.7307,-17.9947,-31.3173  
359,1.306092,0.657906803536155,1.29819,-16.3519,-23.0017,-37.5021  
360,1.309728,0.642653560517622,-1.15652,-28.8932,-26.4249,-37.7076  
361,1.311576,0.692712182513654,4.12858,-11.0495,-15.0336,-27.0139  
362,1.316656,0.695979609065524,3.89736,-11.3509,-16.155,-29.1301  
363,1.319156,0.701265222307422,5.20096,-13.6524,-13.2525,-24.5957  
364,1.322962,0.713617255206312,5.18239,-11.0155,-12.274,-22.3732  
365,1.324167,0.709427564016108,5.00907,-8.40456,-10.8553,-19.2989  
366,1.327776,0.716730694606131,5.3274,-11.1478,-11.8602,-22.1365  
367,1.331875,0.705862718358335,3.76368,-13.7081,-16.3164,-29.2414  
368,1.33256,0.706339660871655,4.05952,-13.3753,-15.4466,-28.274  
369,1.337276,0.703701979045402,3.60494,-15.0575,-14.974,-26.5914  
370,1.340623,0.70219838061942,4.04419,-17.8533,-15.2385,-27.6986  
371,1.343694,0.704194013750439,3.89597,-20.1173,-14.6848,-26.0009  
372,1.346678,0.704637198965468,3.53251,-14.7076,-14.67,-25.4522  
373,1.34962,0.68231640973606,5.27276,-8.44844,-13.5634,-25.2559

374,1.352218,0.711208297051064,4.23256,-16.3727,-13.931,-25.2854  
375,1.354412,0.665690394511149,5.00292,-11.8623,-12.575,-23.4515  
376,1.358406,0.682324797843666,4.634,-12.9718,-14.8169,-26.3406  
377,1.361135,0.711366206152606,4.69601,-13.8884,-12.1778,-21.9494  
378,1.362882,0.671296389419692,4.80755,-13.5537,-16.7127,-28.8571  
379,1.366092,0.714587421857739,4.23222,-12.7441,-13.2001,-23.5268  
380,1.371785,0.692782406272972,5.40952,-11.0238,-13.2248,-24.5526  
381,1.375071,0.681460042298806,6.11903,-9.52506,-10.3758,-20.5018  
382,1.378634,0.696978069100711,5.55438,-11.4812,-12.8505,-24.7037  
383,1.380574,0.568338178002388,-1.08029,-20.1607,-26.8781,-40.6213  
384,1.384104,0.700328963489341,5.91303,-11.1269,-10.9266,-21.1053  
385,1.390186,0.690699152801379,5.74537,-11.7504,-12.1544,-23.3284  
386,1.39242,0.692064695167423,5.84985,-12.0147,-12.0336,-23.553  
387,1.400811,0.706585395736339,5.33508,-9.99101,-11.6278,-22.3882  
388,1.404389,0.602389425211842,-0.542587,-26.0527,-24.101,-32.3855  
389,1.420477,0.597890458213222,0.730277,-18.9446,-20.2178,-31.4748  
390,1.423142,0.599497641993028,0.590804,-17.9241,-22.0902,-33.0763  
391,1.442787,0.412356232596578,-3.57882,-31.7072,-19.6381,-26.1436  
392,1.481787,0.402245534985814,-2.09573,-23.5323,-18.4921,-23.0552
